# Supplementary material for: Structural analysis of M1AP variants associated with severely impaired spermatogenesis causing male infertility
Source: PeerJ journal article supplement (doi:10.7717/peerj.12947), 2022-03-21

# Wild-type

## Minimization and Equilibration

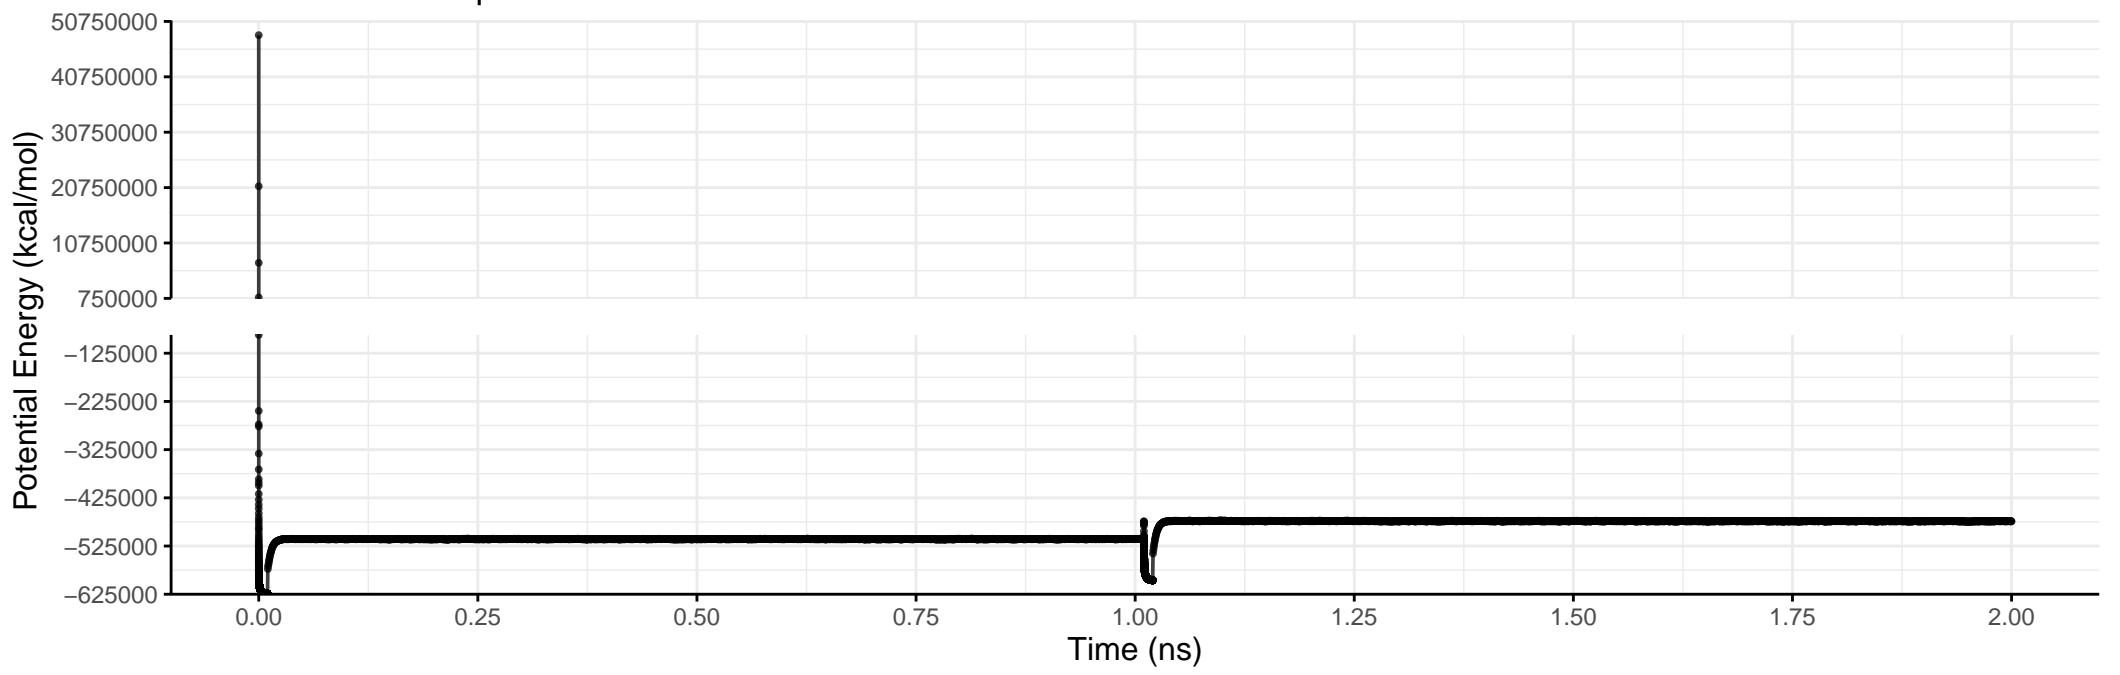

## Repeat 1

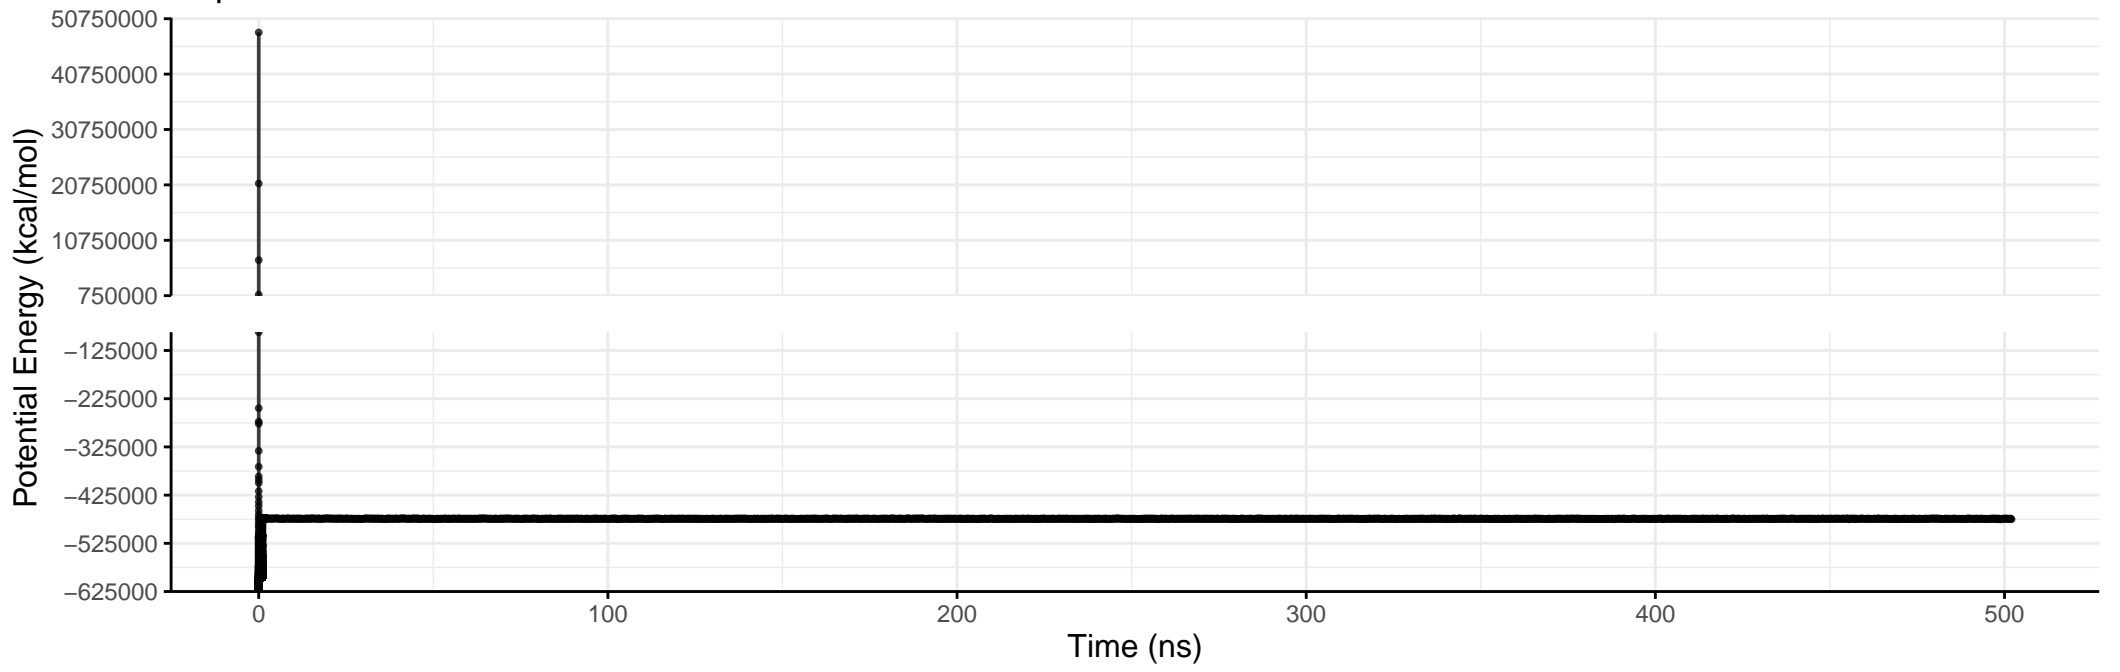

## Repeat 2

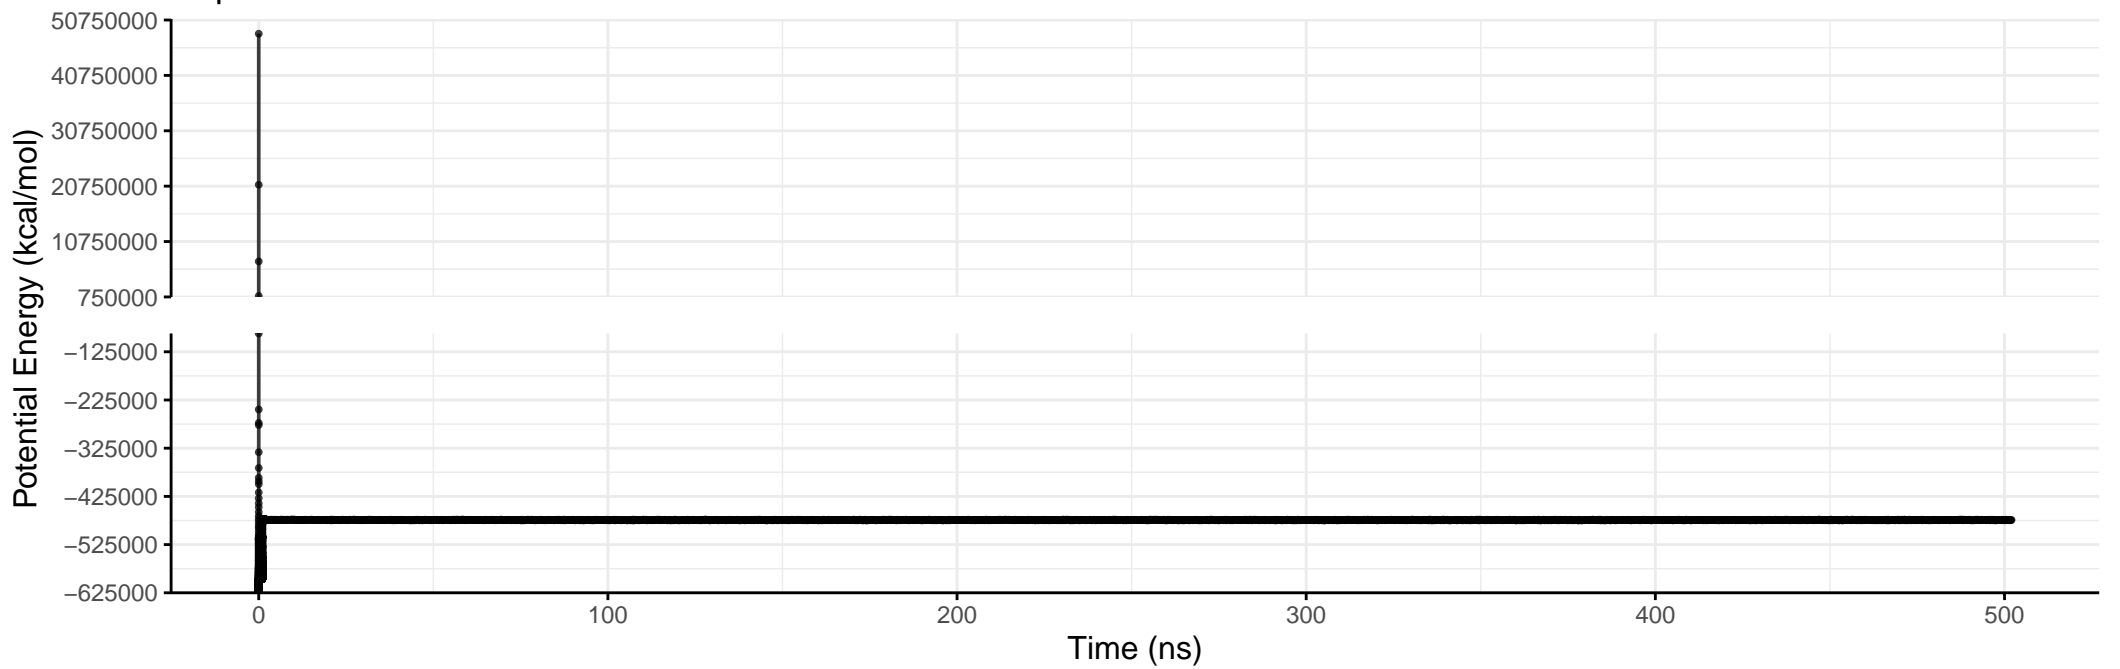

# p.Ser50Pro

## Minimization and Equilibration

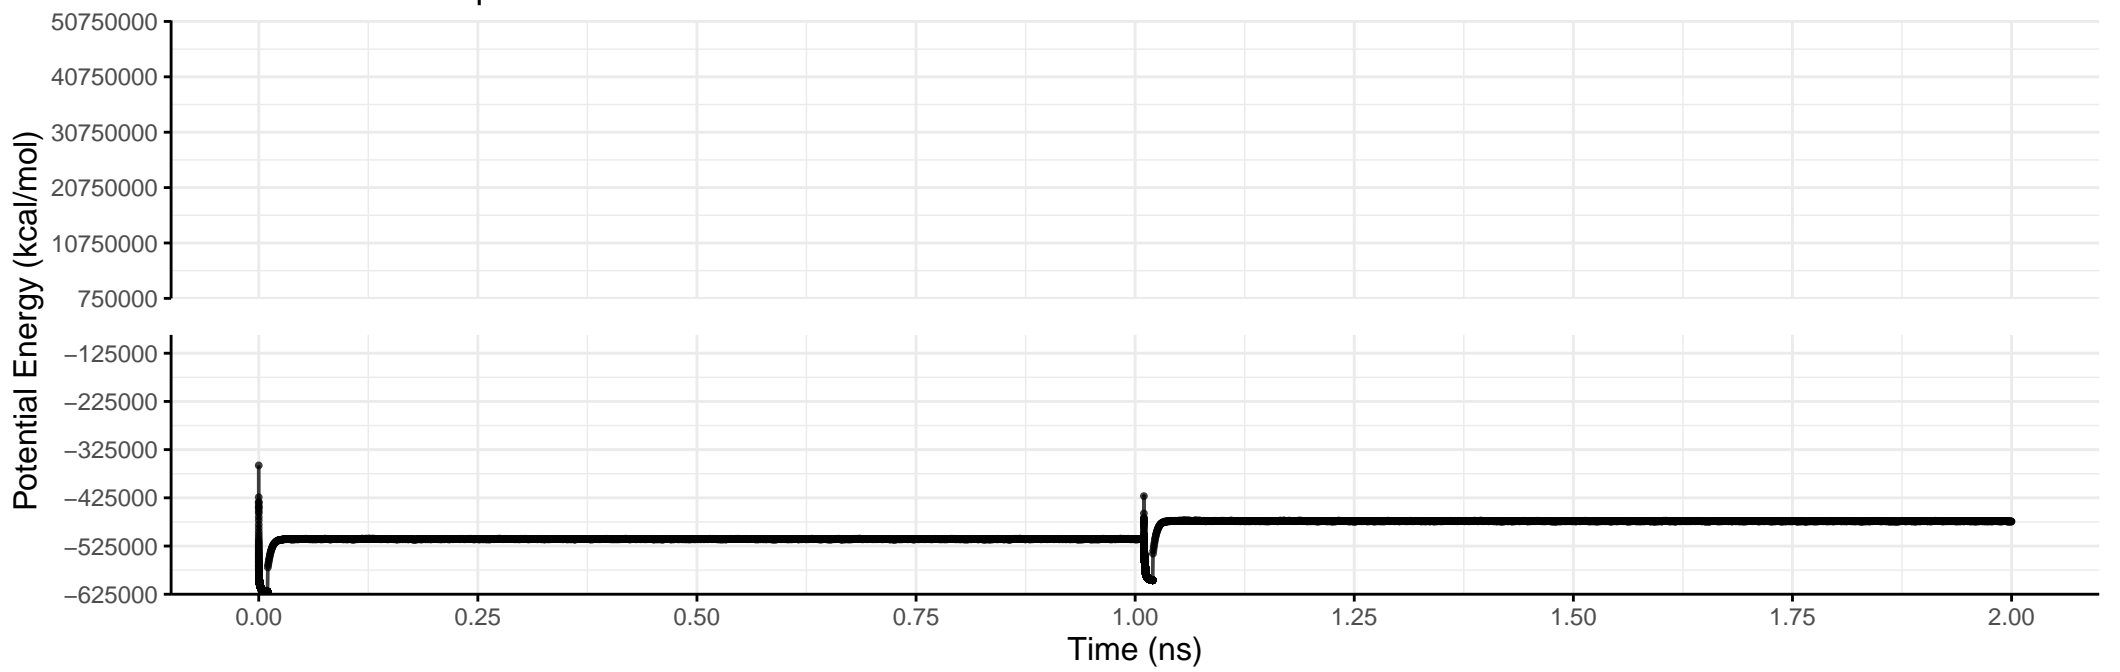

## Repeat 1

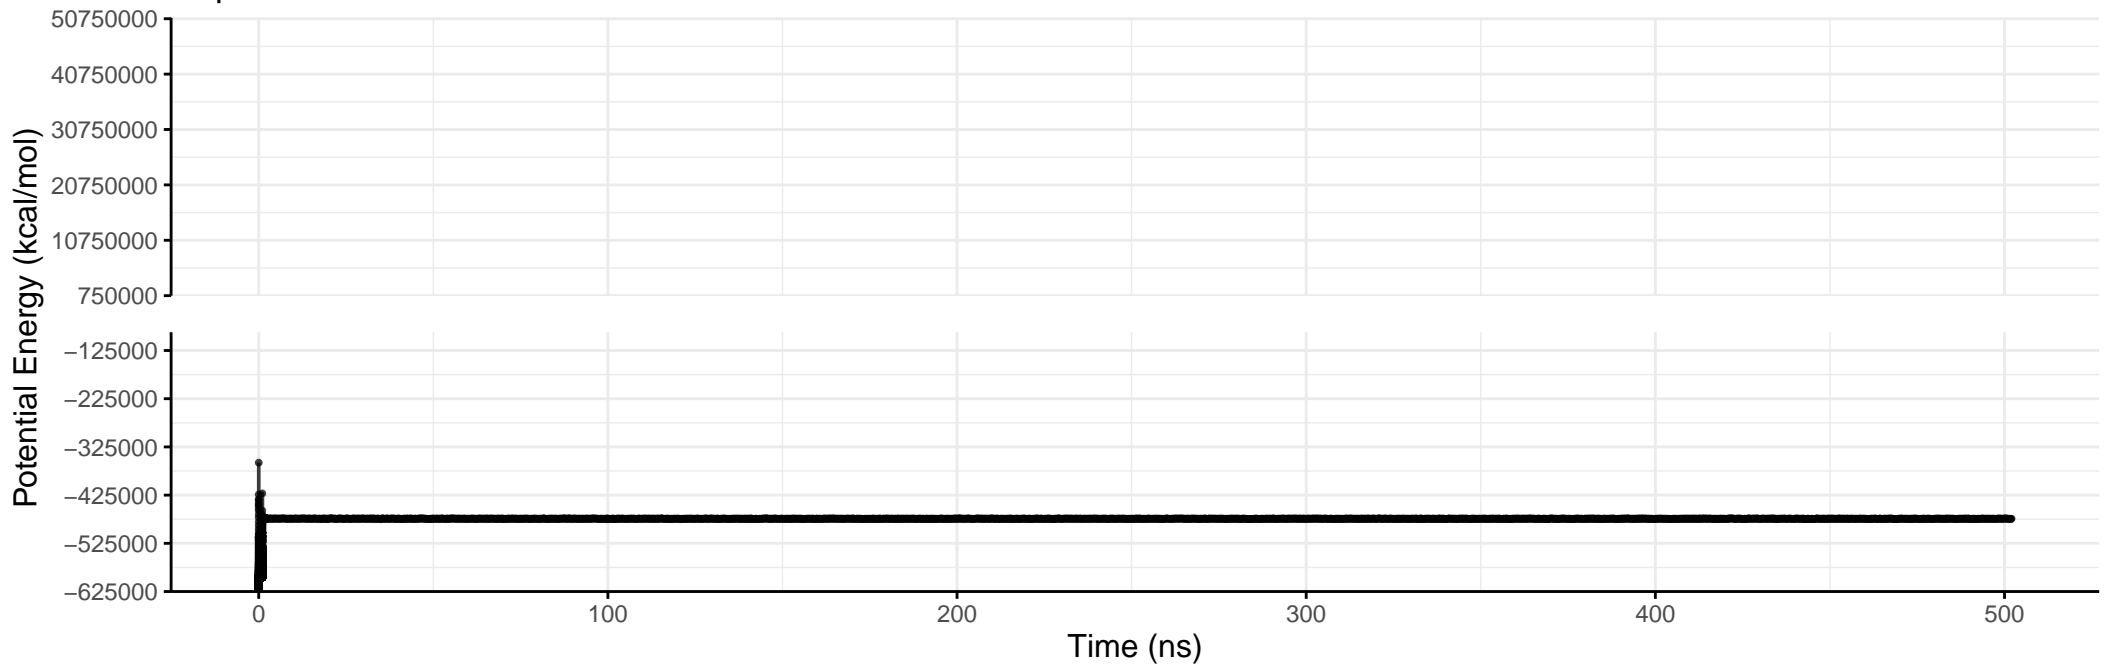

## Repeat 2

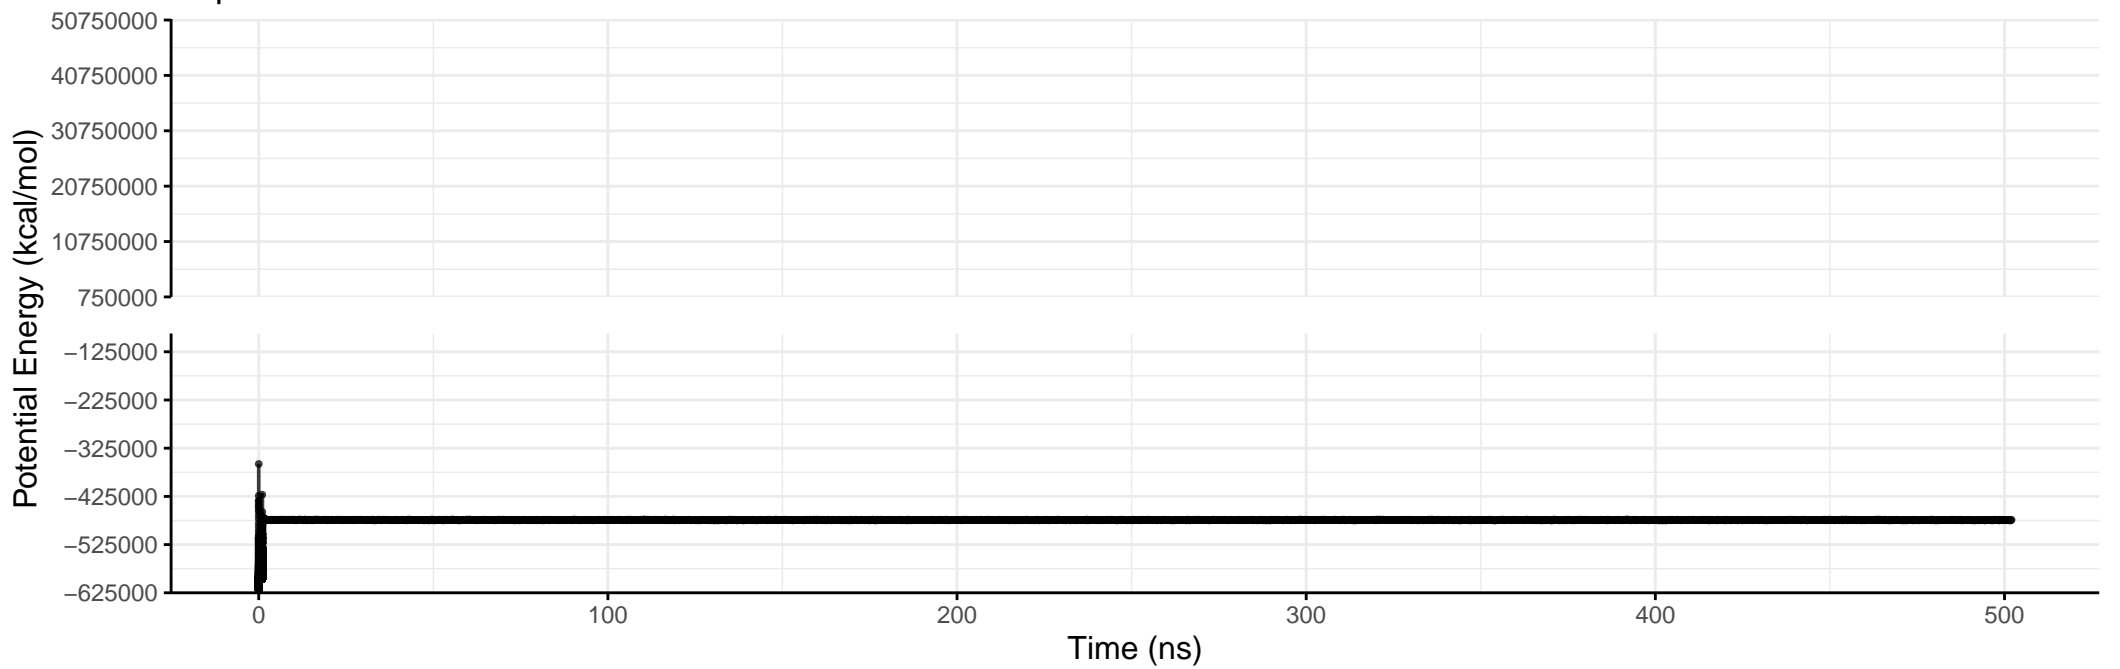

# p.Arg266Gln

## Minimization and Equilibration

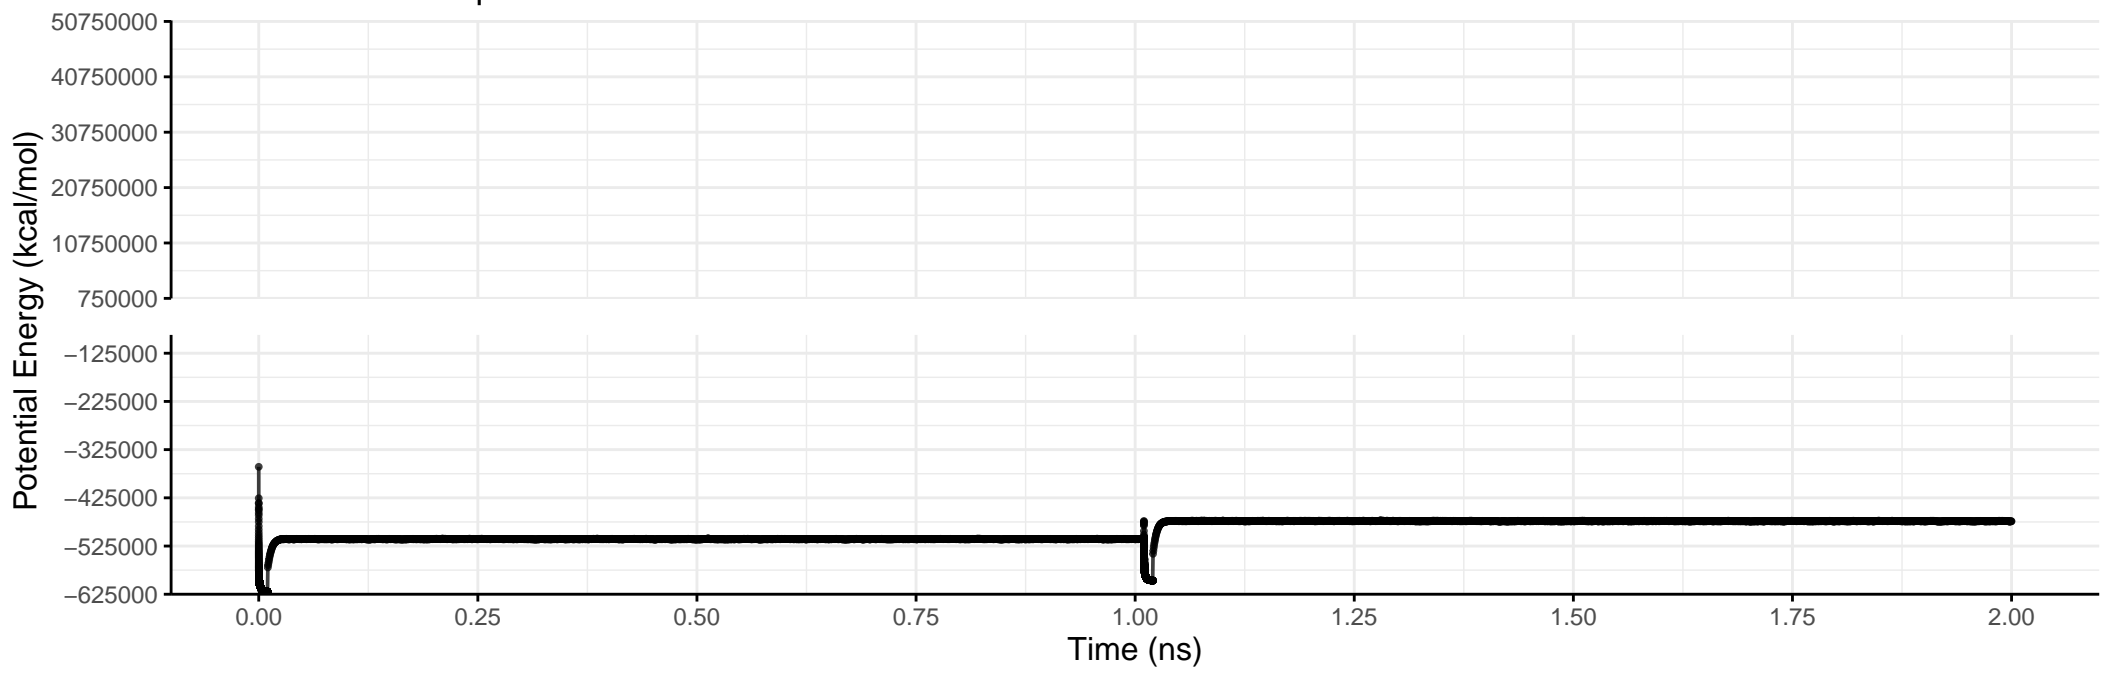

## Repeat 1

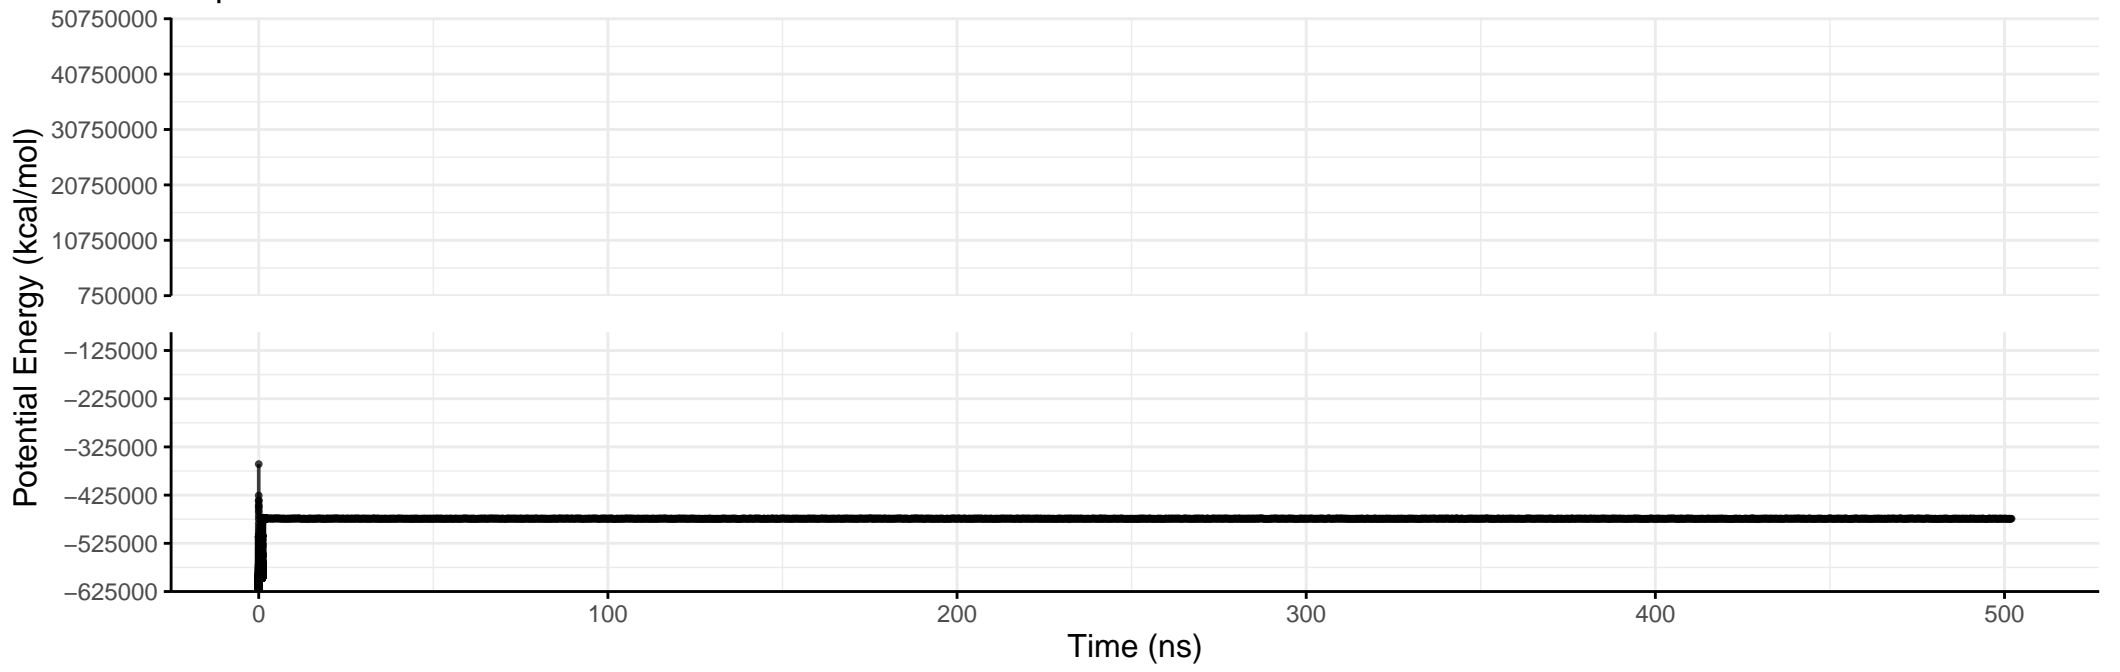

## Repeat 2

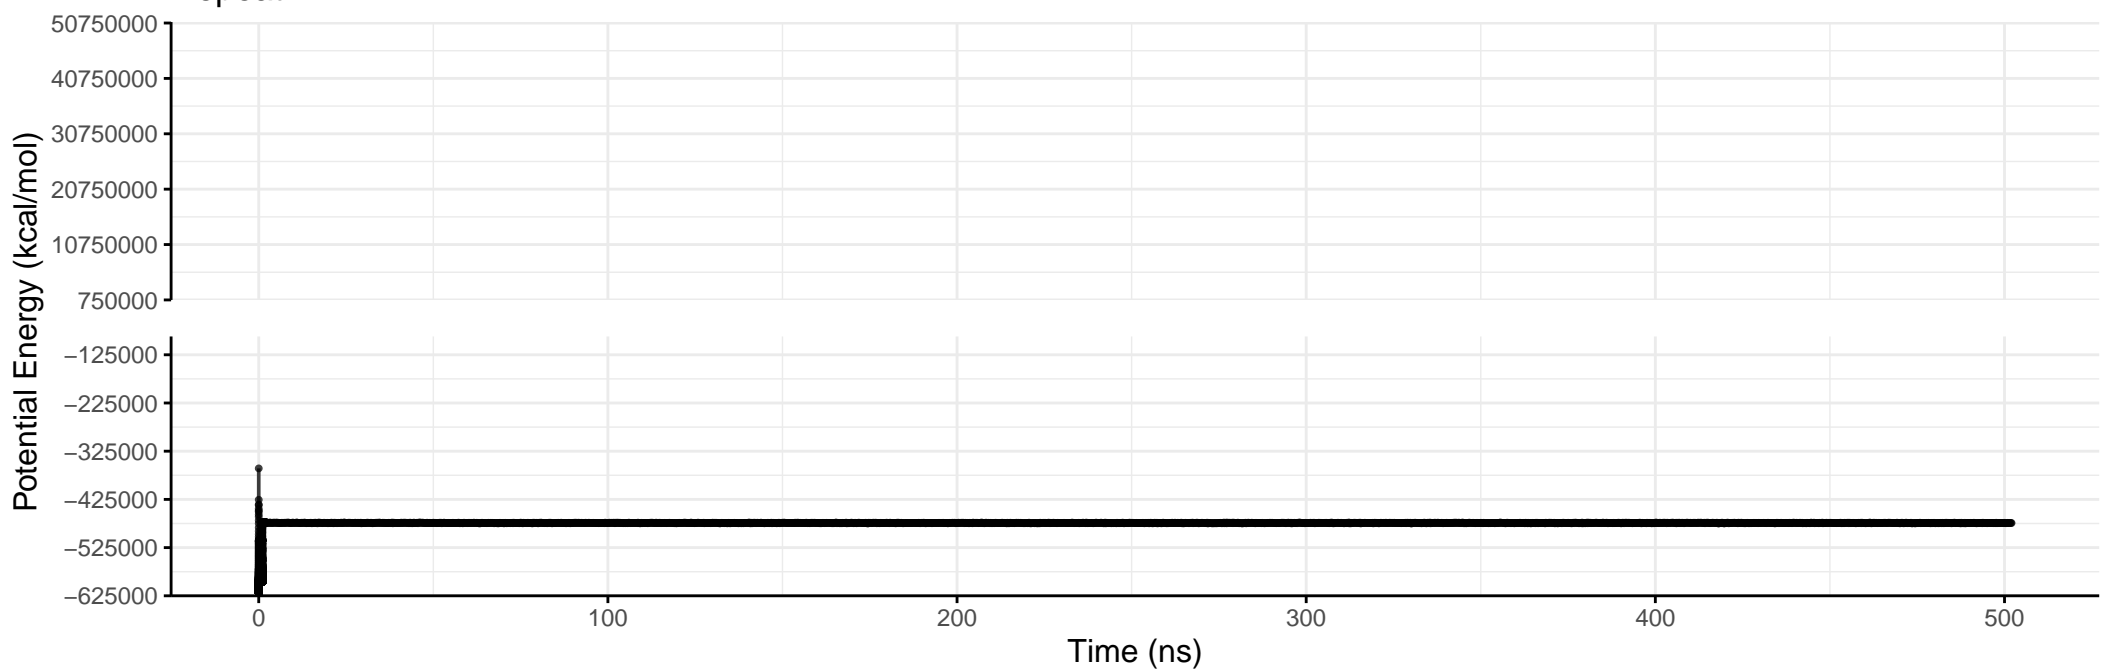

# p.Gly317Arg

## Minimization and Equilibration

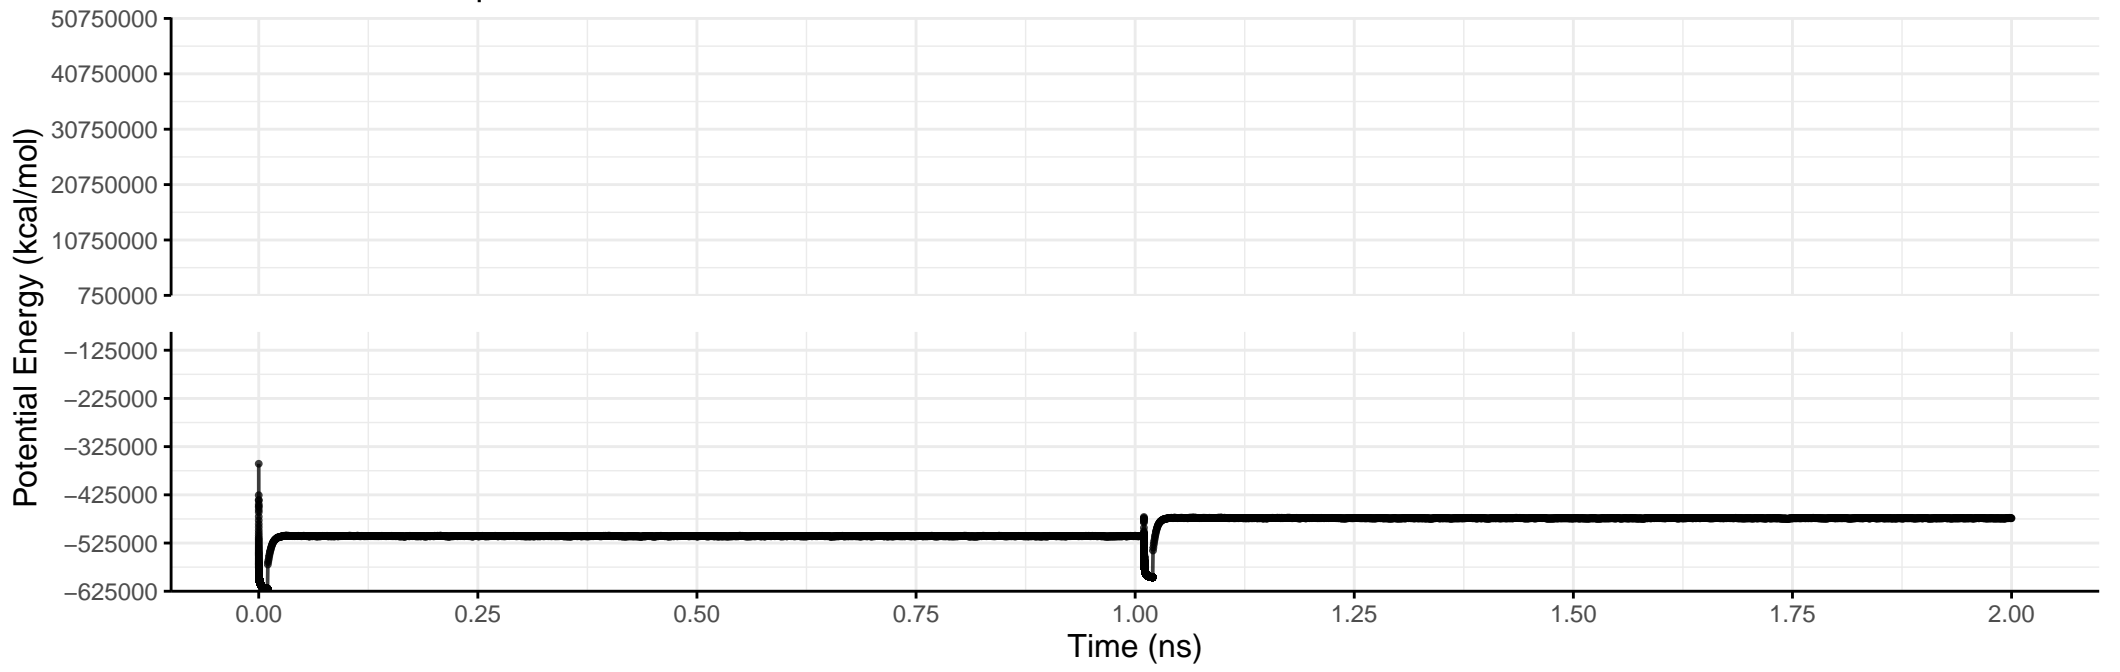

## Repeat 1

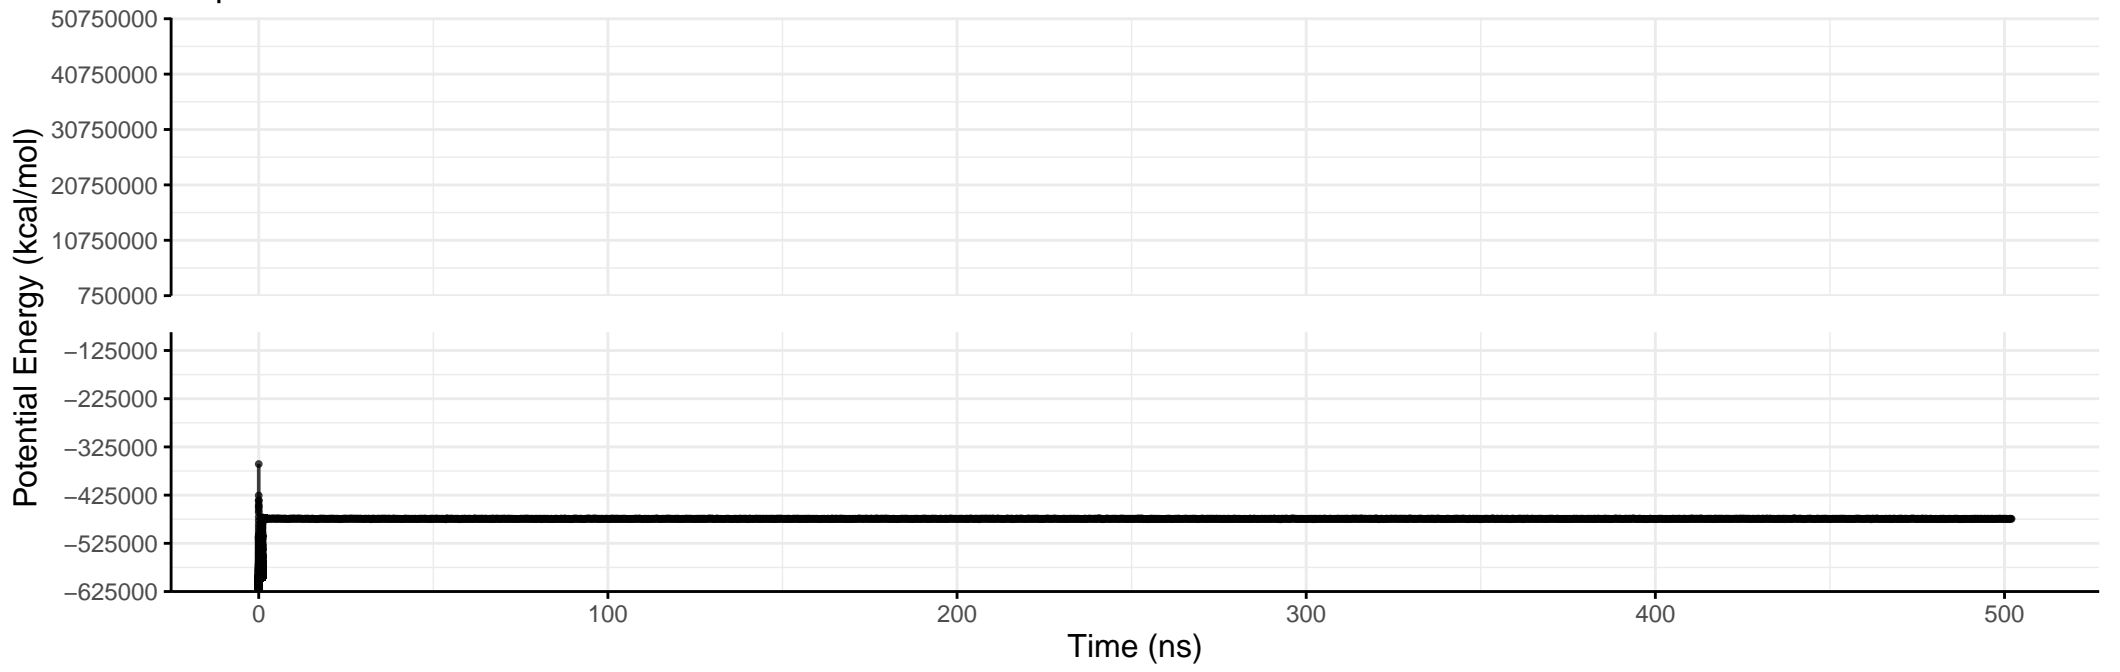

## Repeat 2

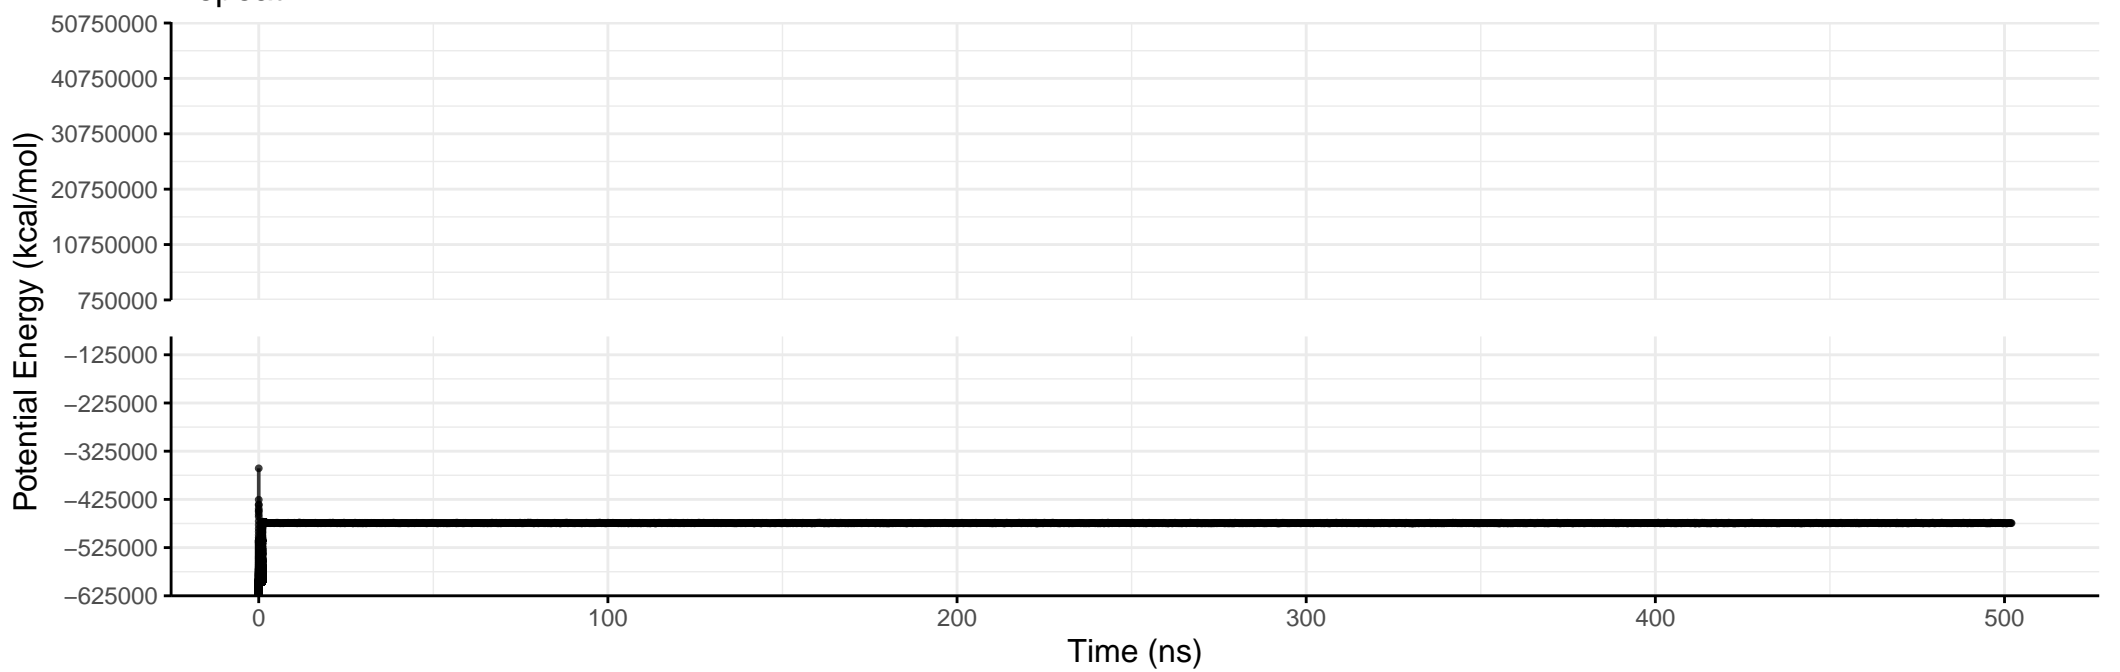

# p.Pro389Leu

## Minimization and Equilibration

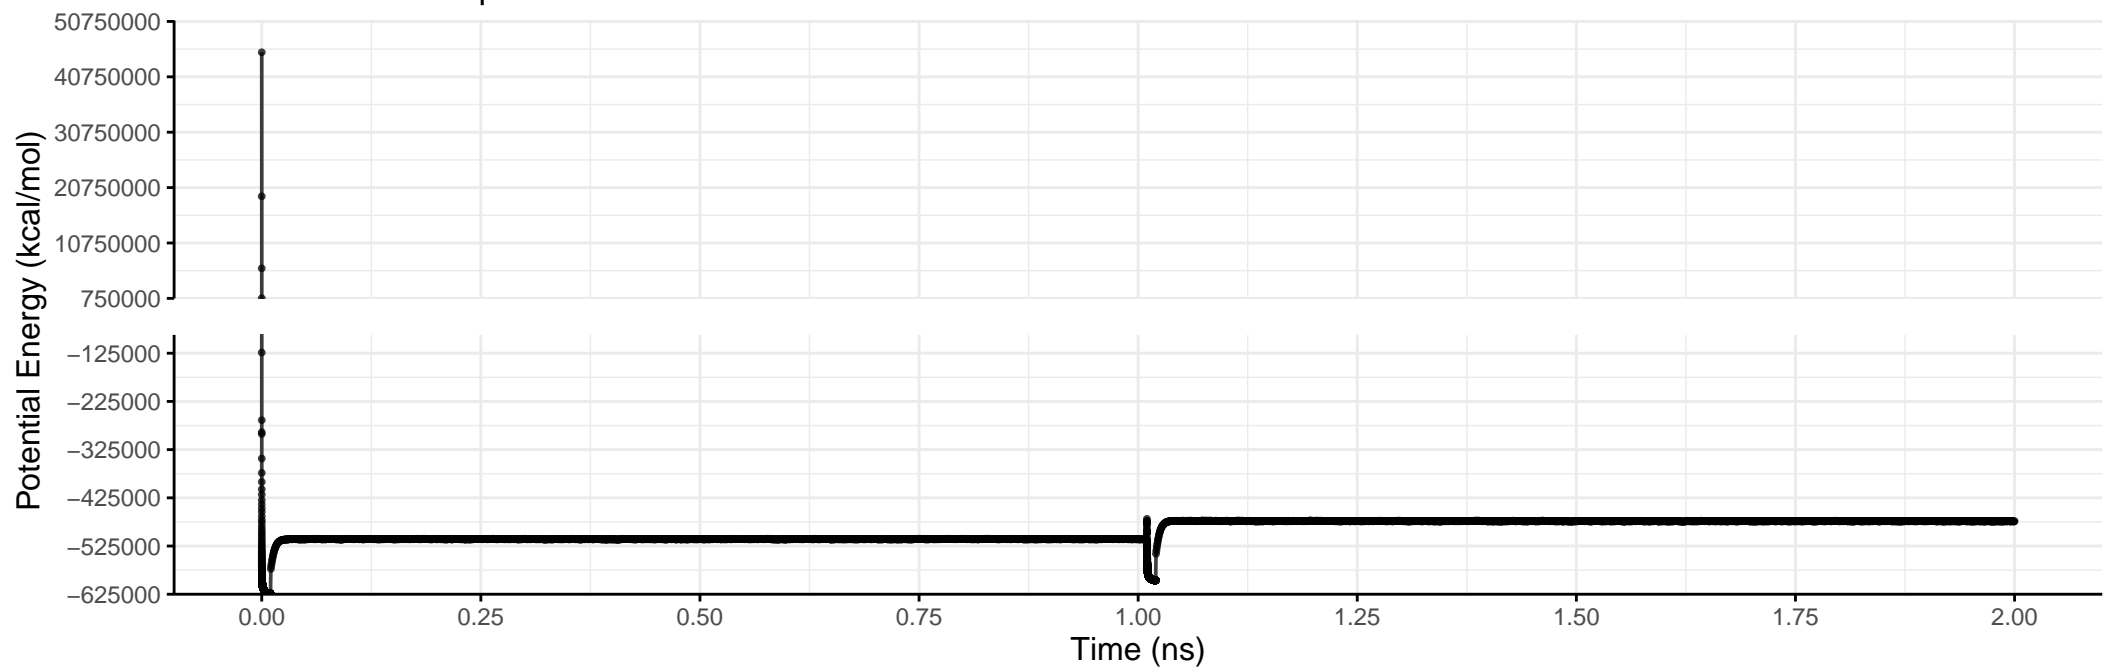

## Repeat 1

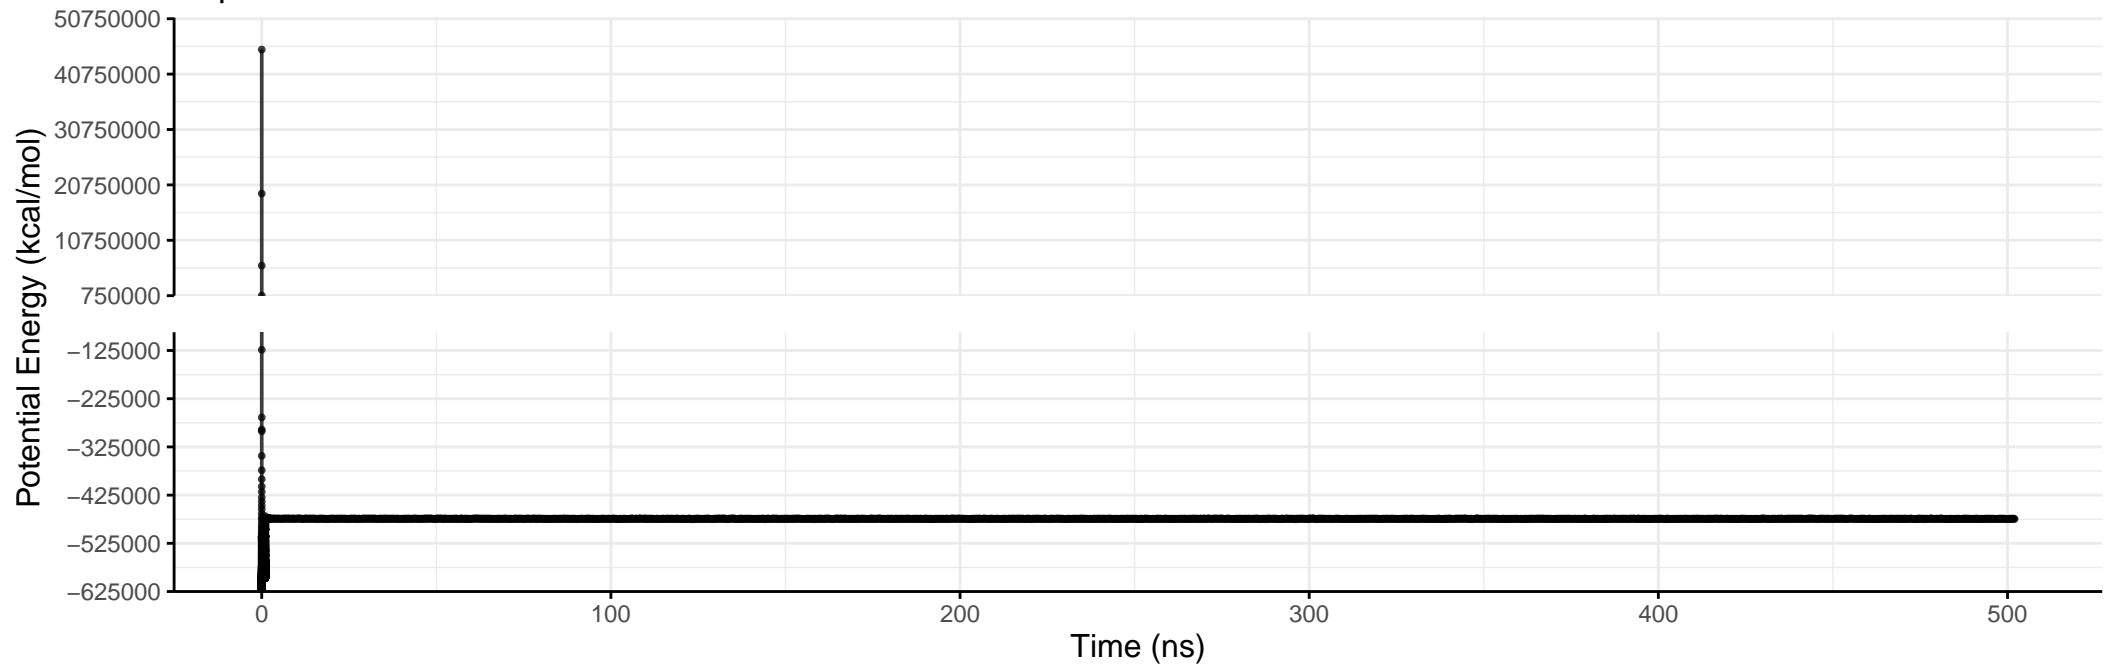

## Repeat 2

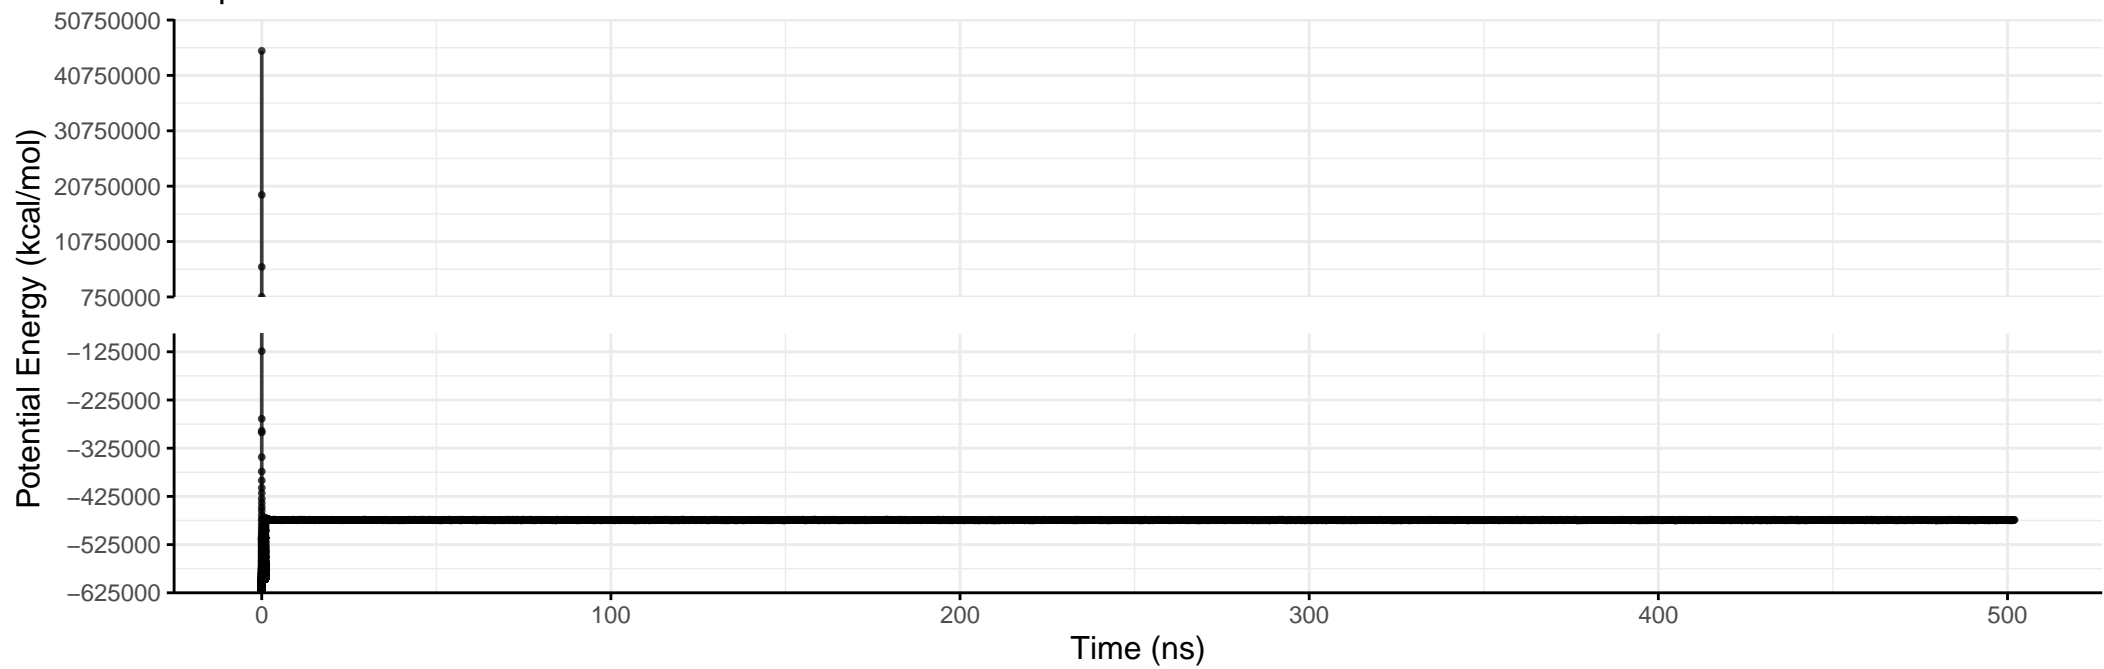

# p.Leu430Pro

## Minimization and Equilibration

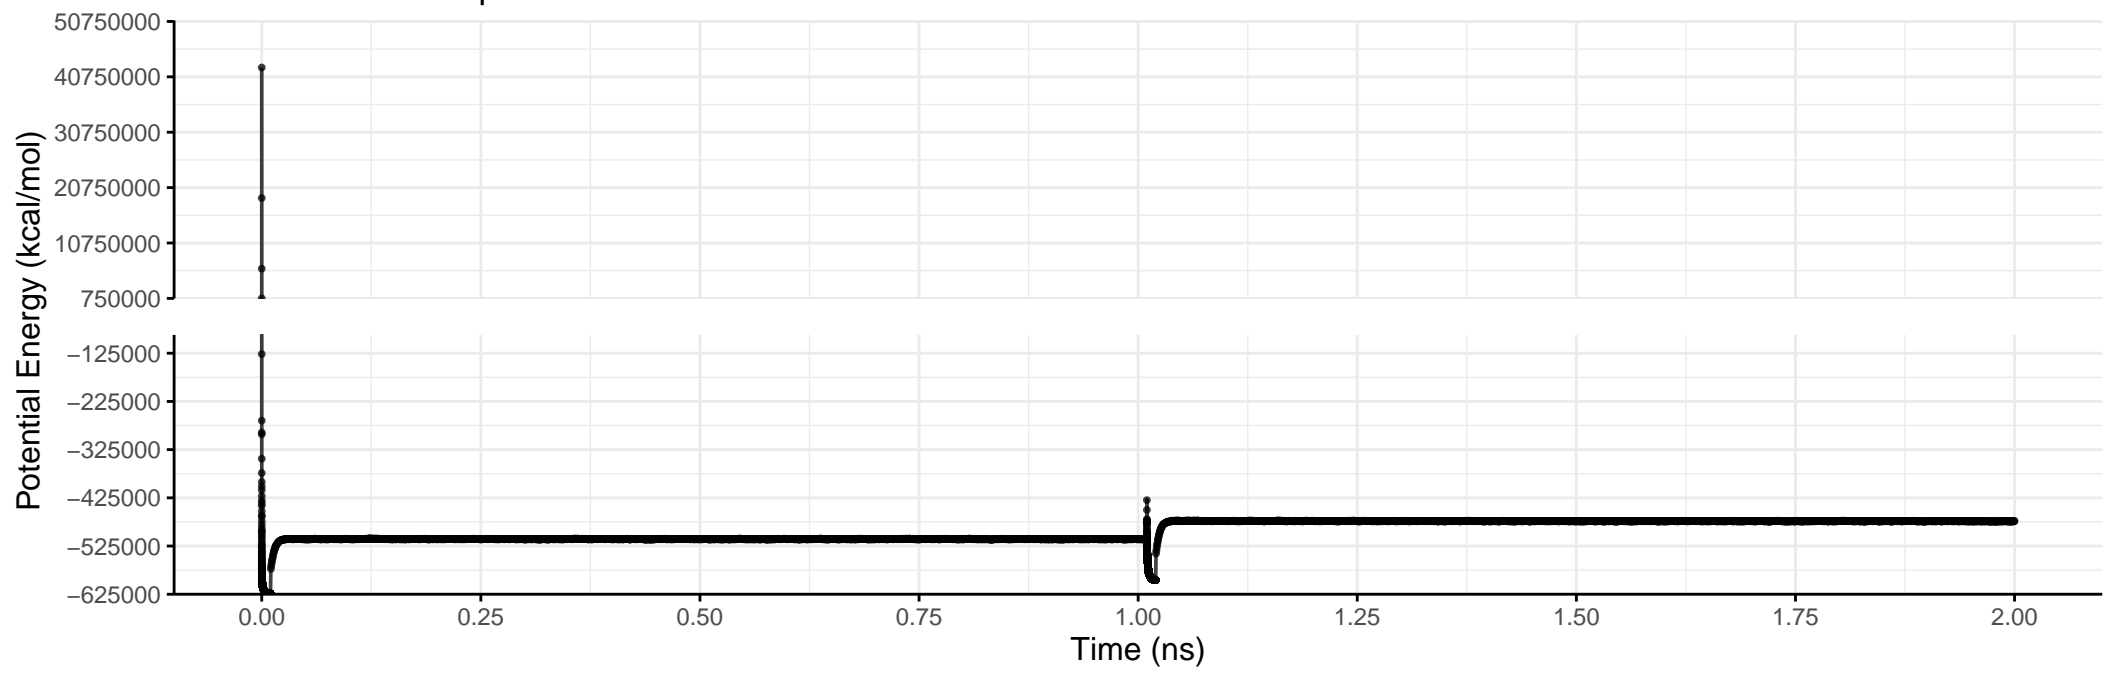

## Repeat 1

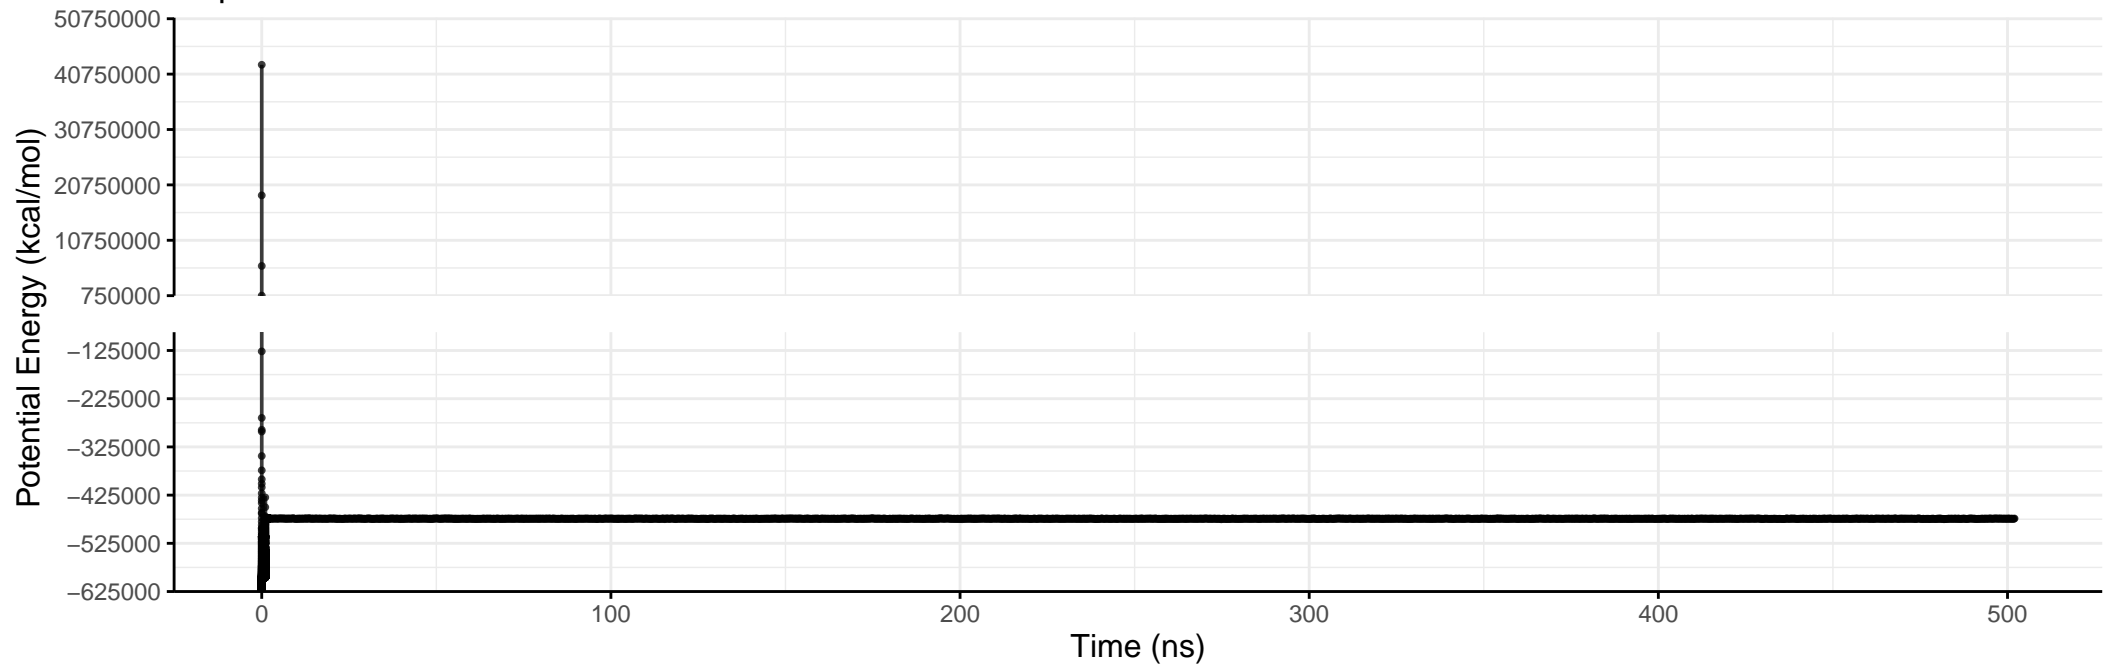

## Repeat 2

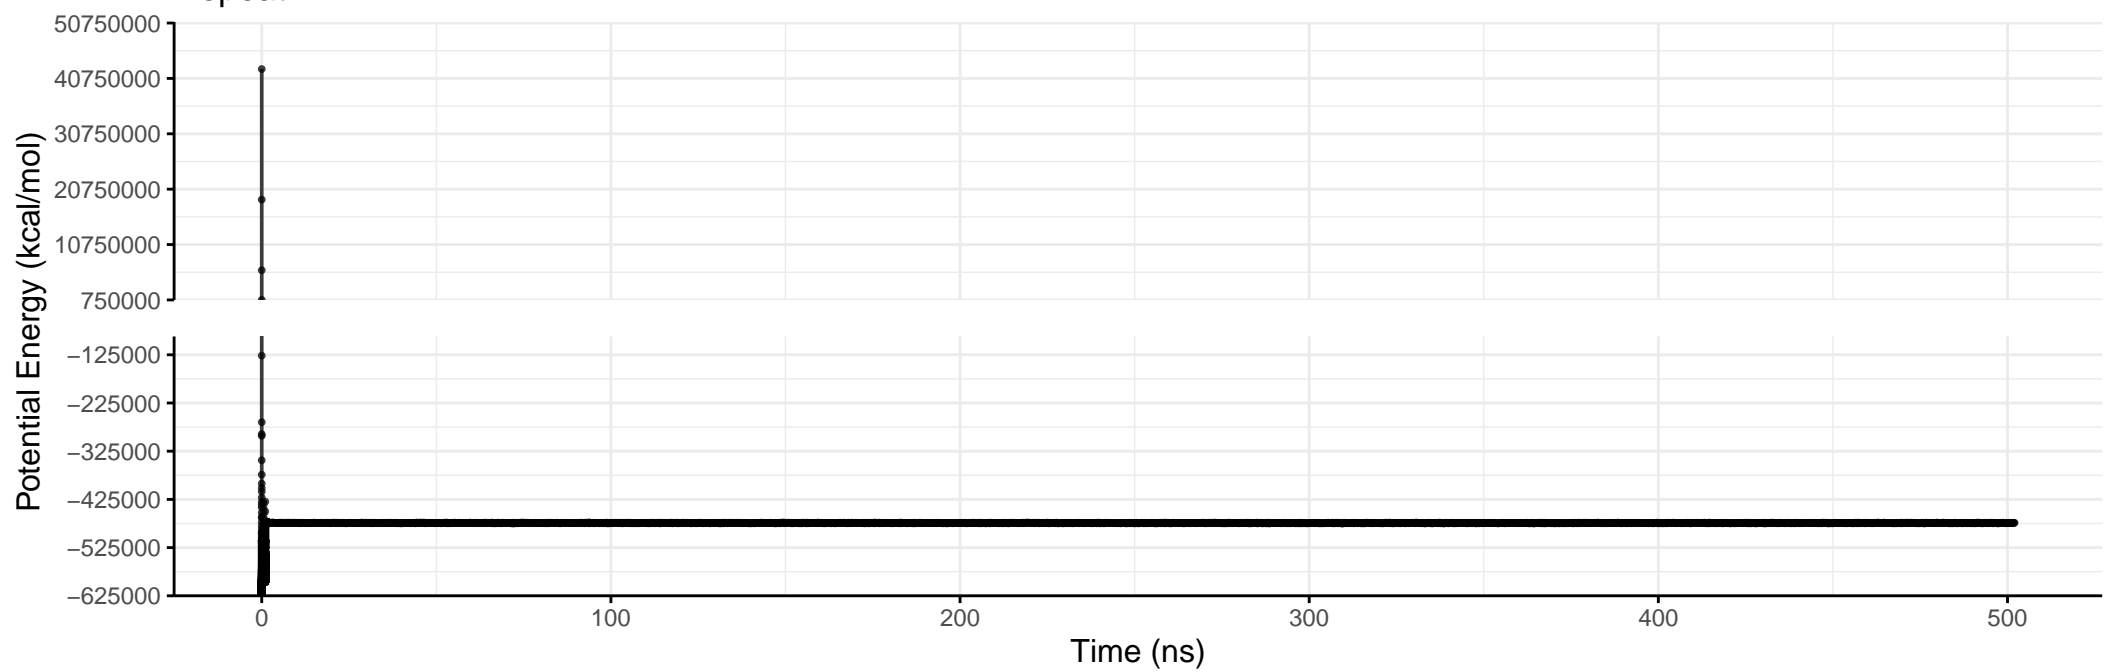

Supplement: Figure_S3_Potential_Energy_500ns.pdf [file Figure_S3_Potential_Energy_500ns.pdf]
