# Supplementary material for: Structural analysis of M1AP variants associated with severely impaired spermatogenesis causing male infertility
Source: PeerJ journal article supplement (doi:10.7717/peerj.12947), 2022-03-21

# p.Ser50Pro

Repeat 1

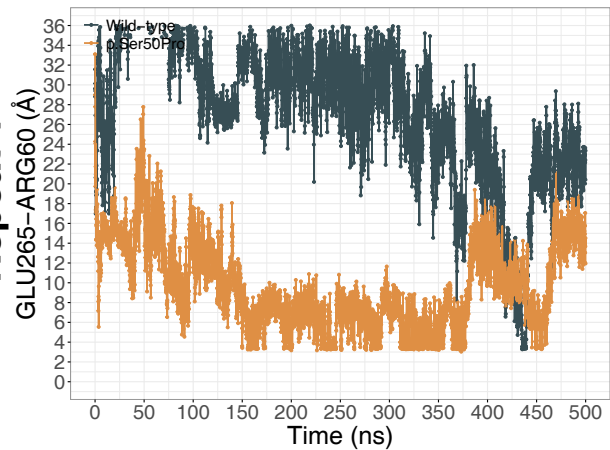

Repeat 2

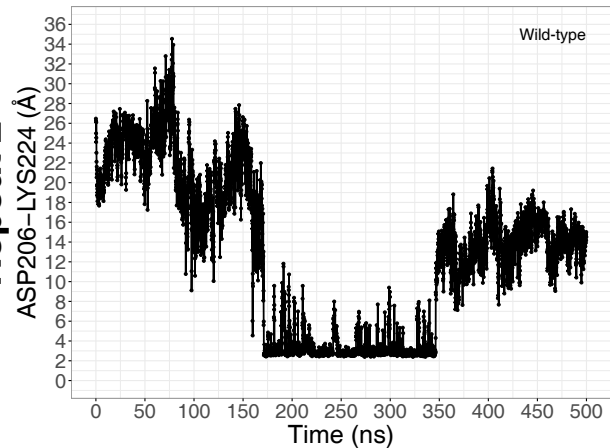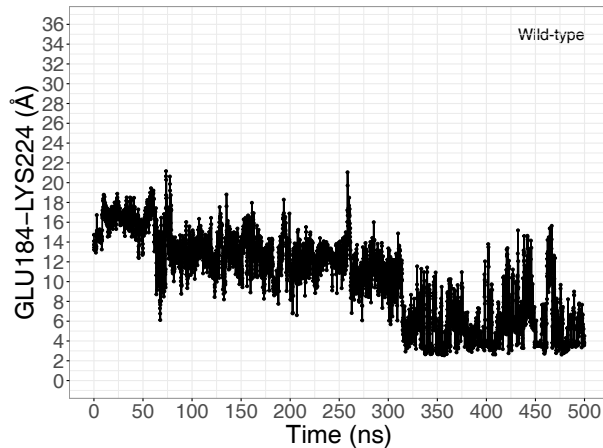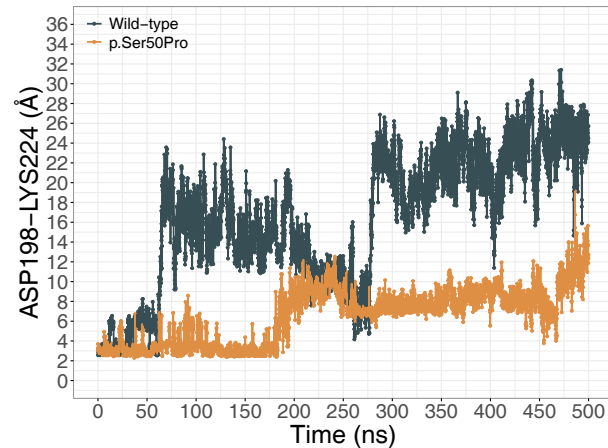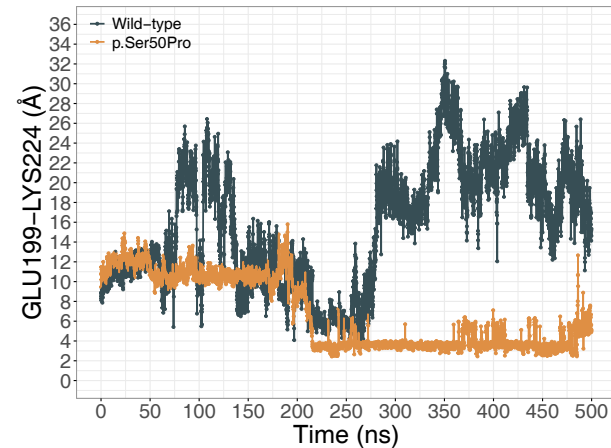

# p.Arg266Gln

Repeat 1

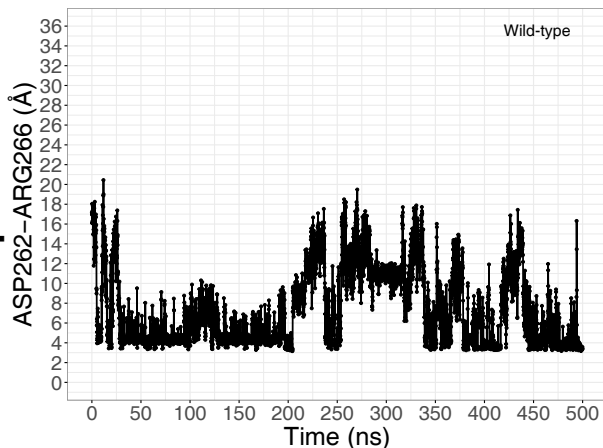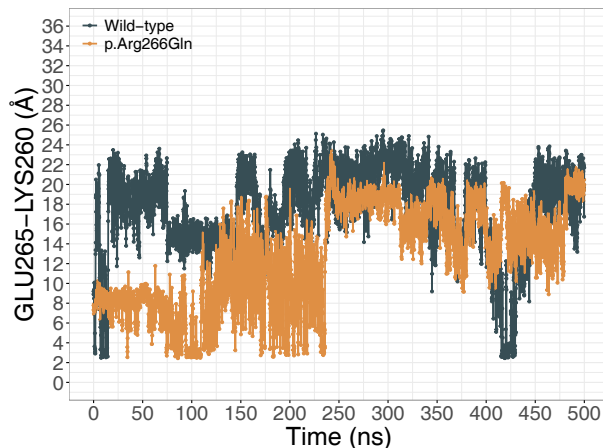

Repeat 2

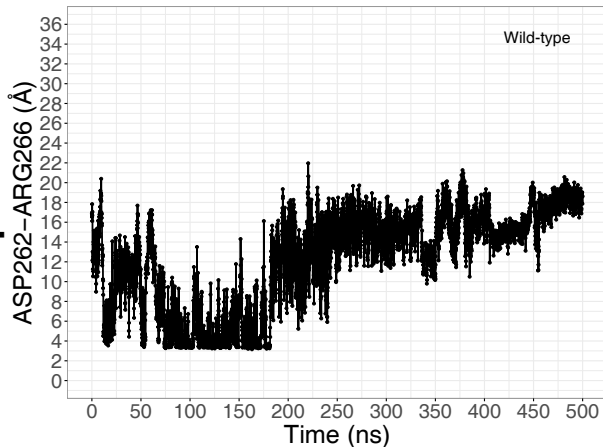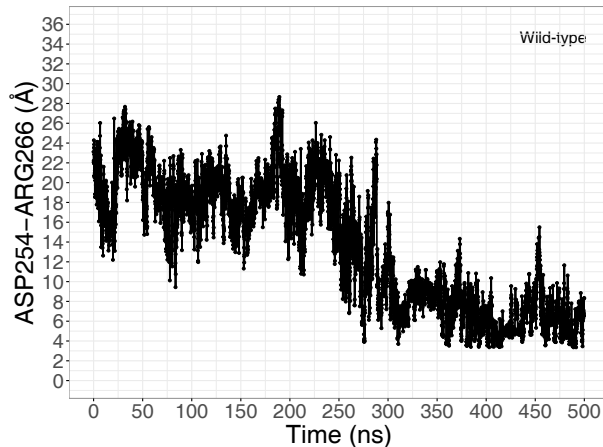

# p.Gly317Arg

Repeat 1

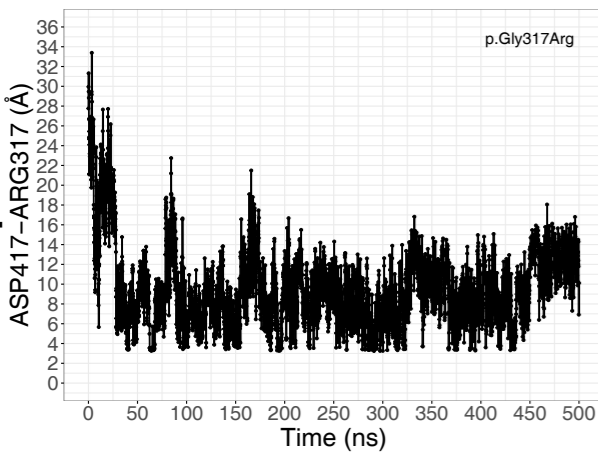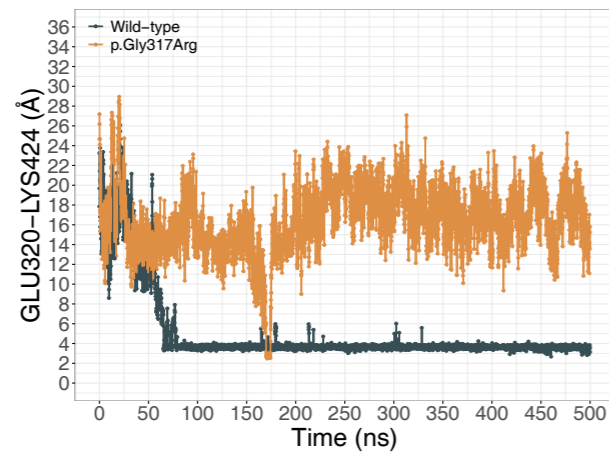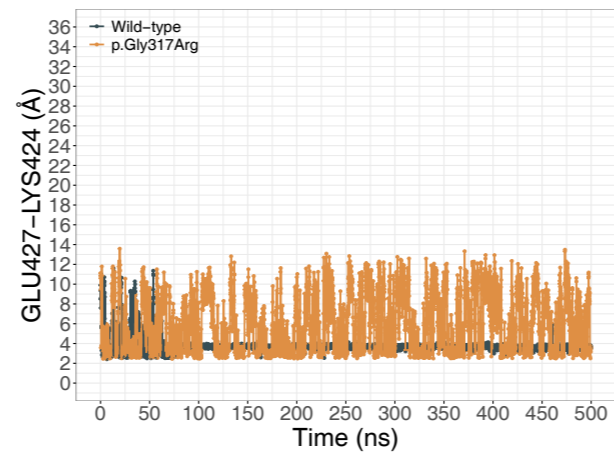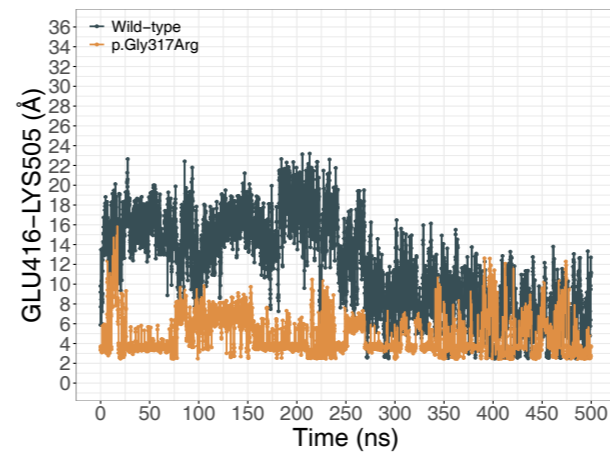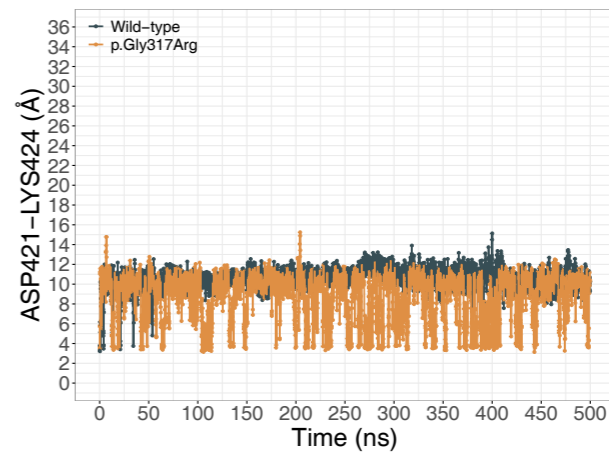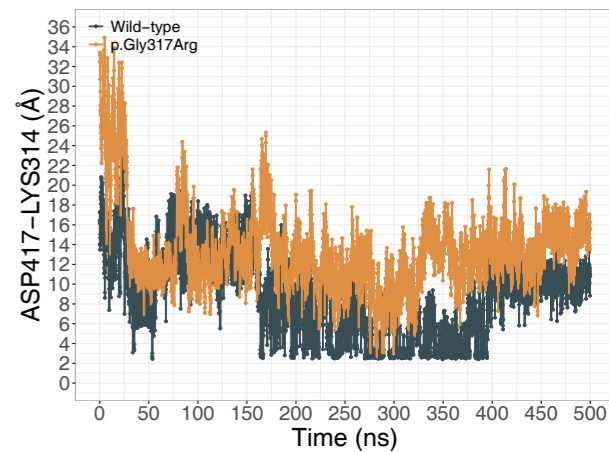

Repeat 2

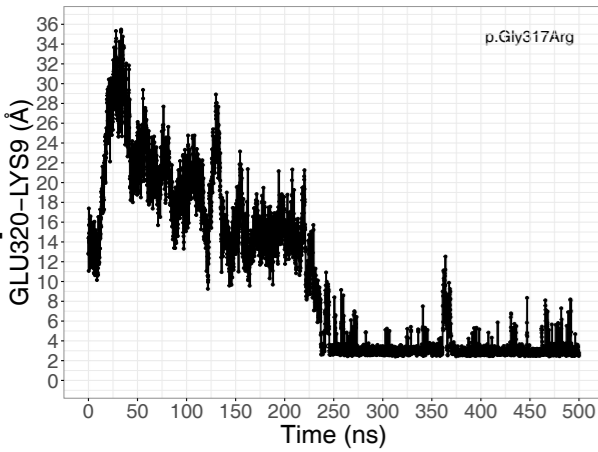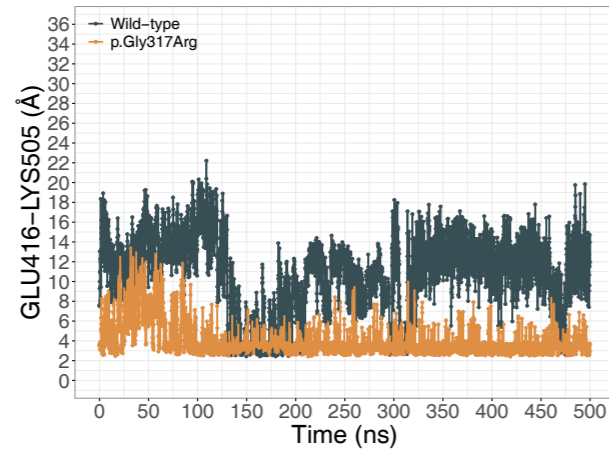

# p.Pro389Leu

Repeat 1

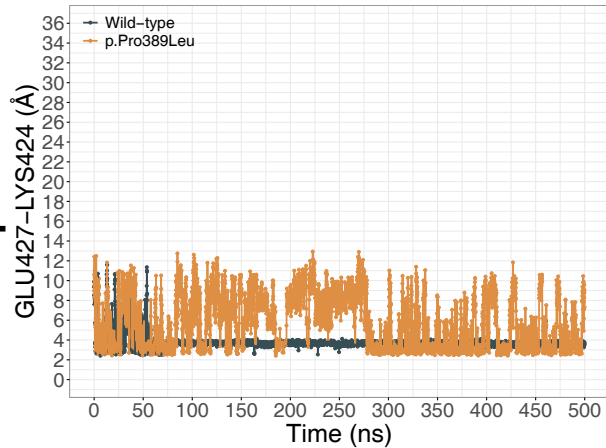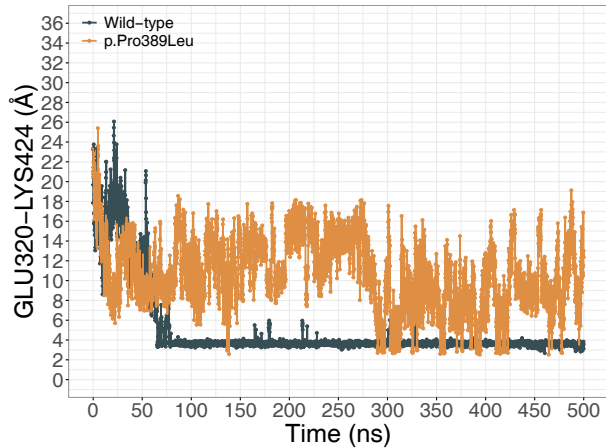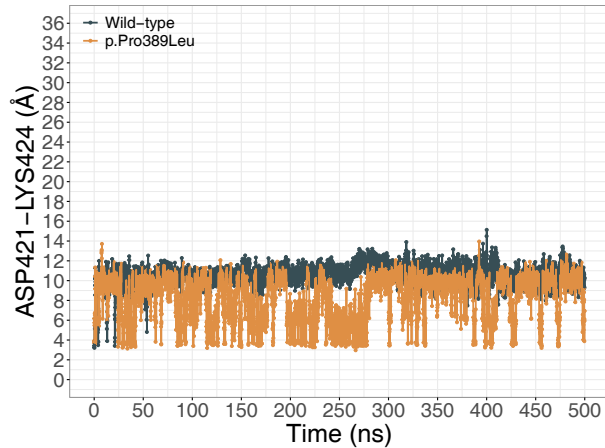



# p.Leu430Pro

Repeat 1

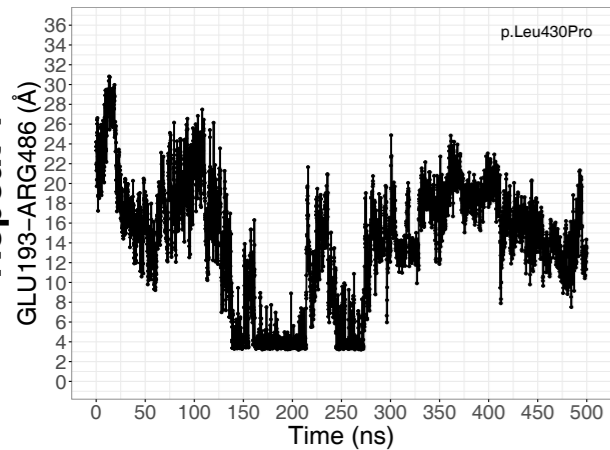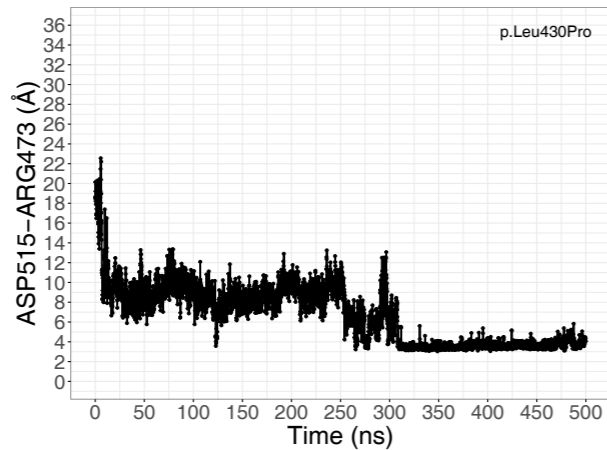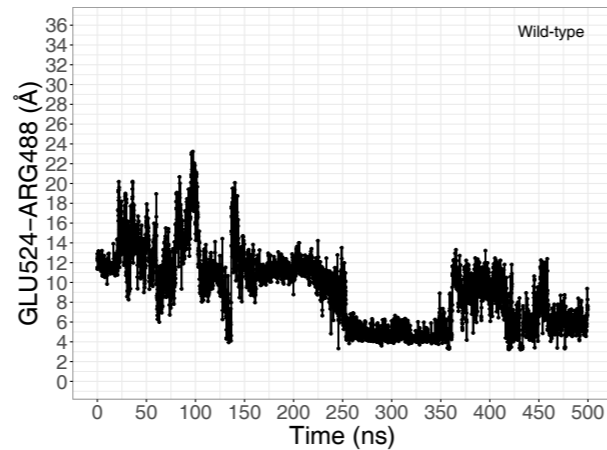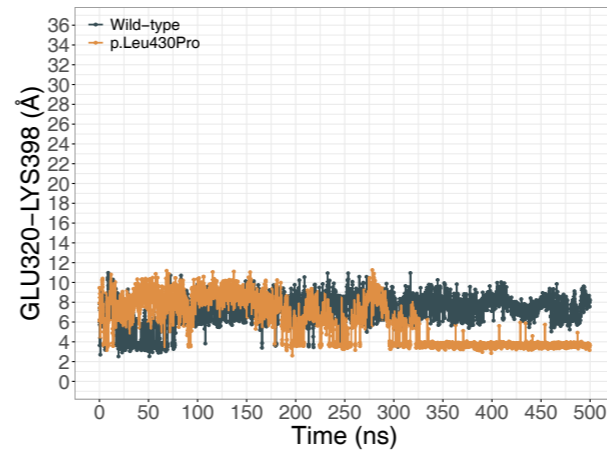

Repeat 2

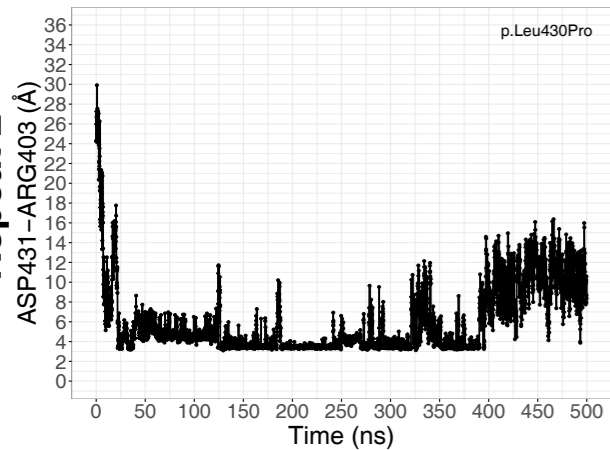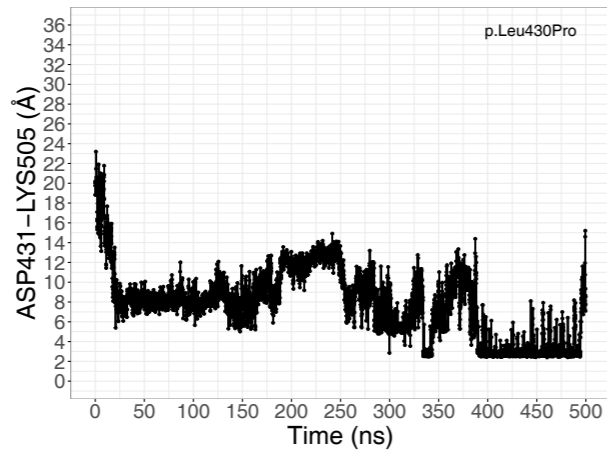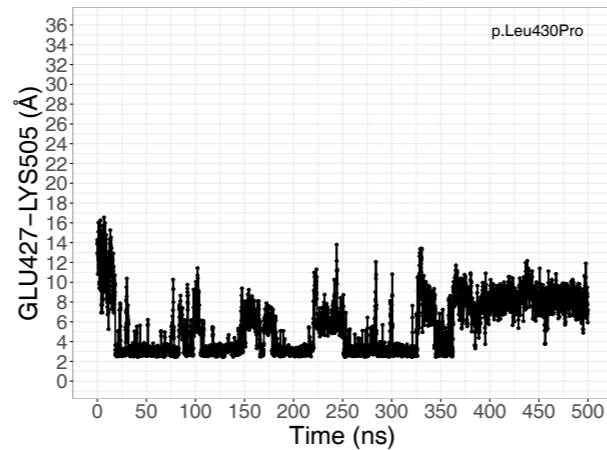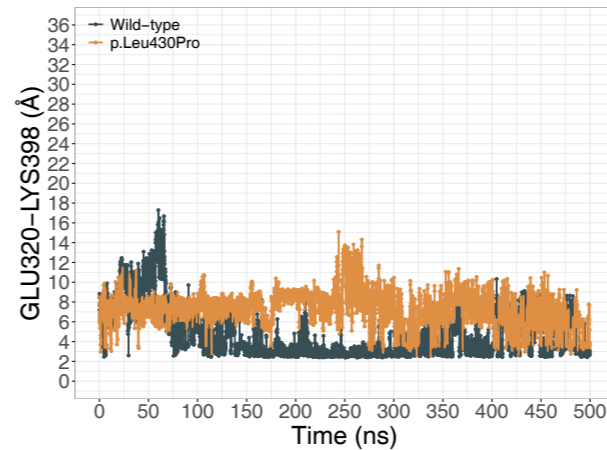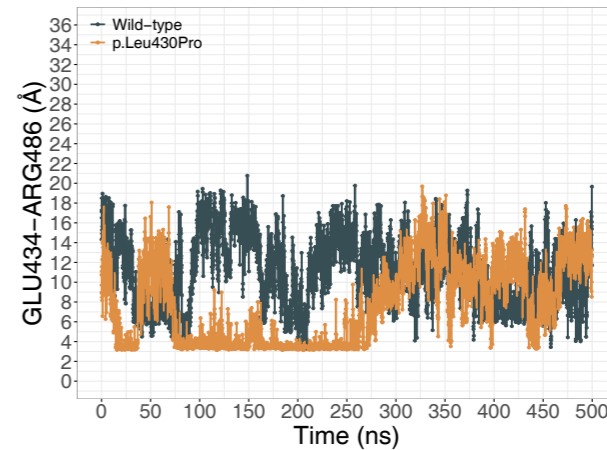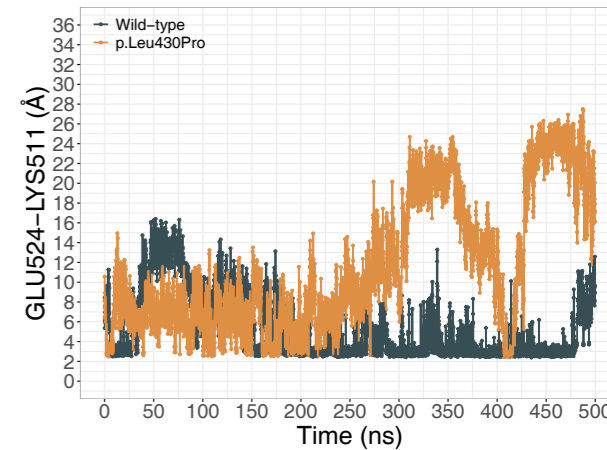

Supplement: Figure_S8_changedSaltbridges.pdf [file Figure_S8_changedSaltbridges.pdf]
