# Supplementary material for: Structural analysis of M1AP variants associated with severely impaired spermatogenesis causing male infertility
Source: PeerJ journal article supplement (doi:10.7717/peerj.12947), 2022-03-21
Supplement: Figure_S1_model_vs_Alphafold2.pdf [file Figure_S1_model_vs_Alphafold2.pdf]

**A**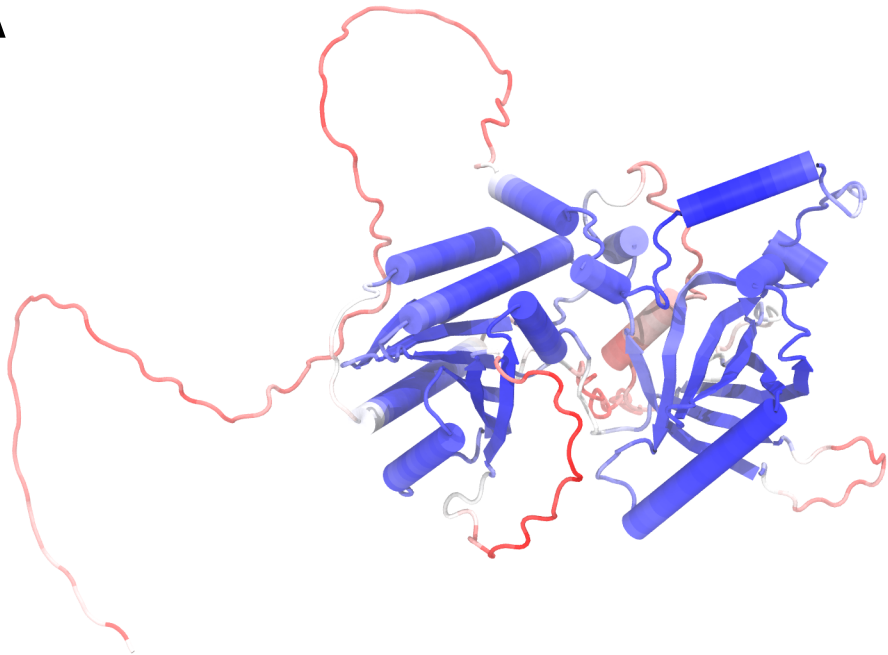**B**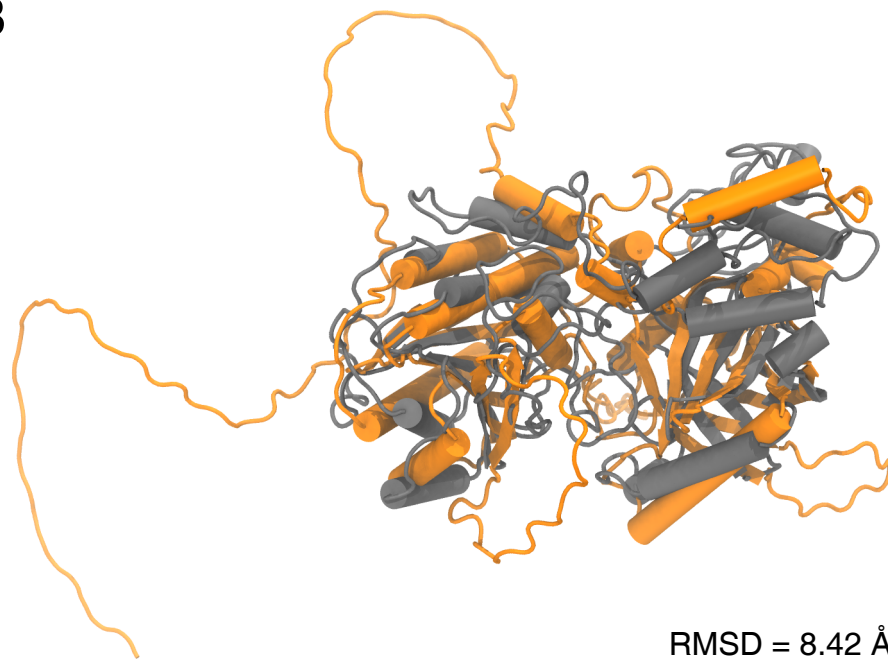

RMSD = 8.42 Å
