# Supplementary material for: Structural analysis of M1AP variants associated with severely impaired spermatogenesis causing male infertility
Source: PeerJ journal article supplement (doi:10.7717/peerj.12947), 2022-03-21
Supplement: Figure_S2_modelComparisons_alignedStructuresFromMultimodelGeneratingTools.pdf [file Figure_S2_modelComparisons_alignedStructuresFromMultimodelGeneratingTools.pdf]

# GalaxyWeb Models

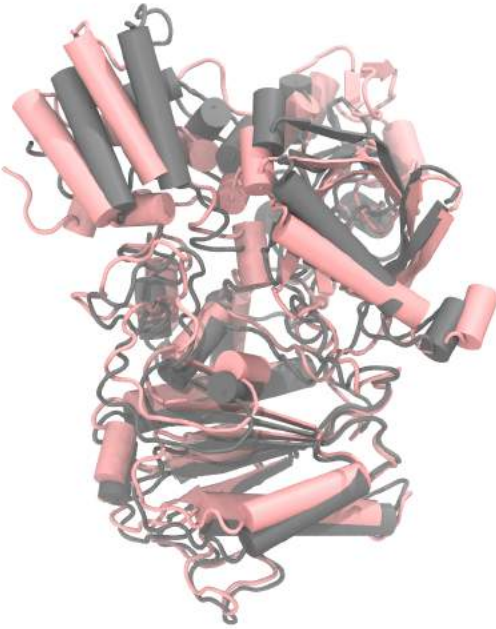

**Model 1 vs Model 2**

RMSD = 3.01 Å

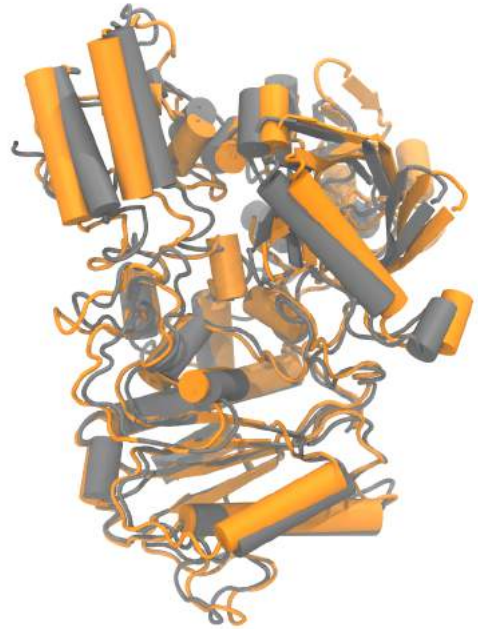

**Model 1 vs Model 3**

RMSD = 2.05 Å

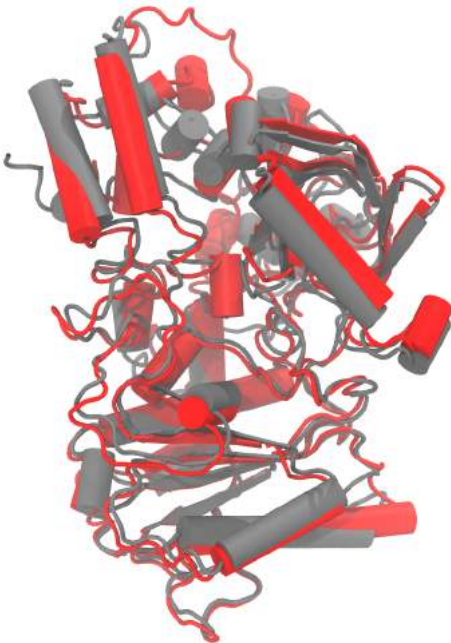

**Model 1 vs Model 4**

RMSD = 1.76 Å

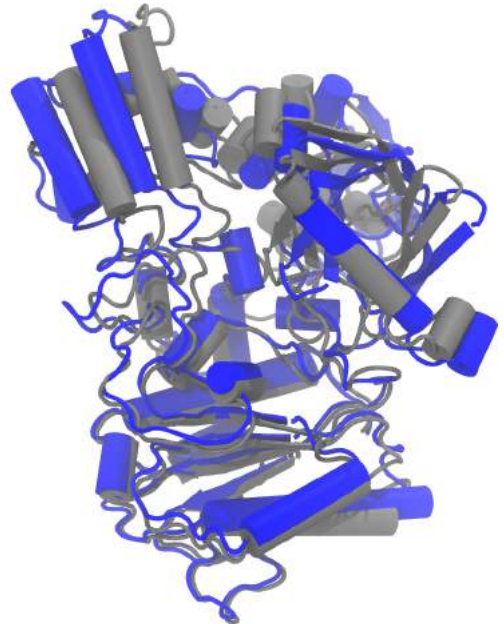

**Model 1 vs Model 5**

RMSD = 3.28 Å

# I-TASSER Models

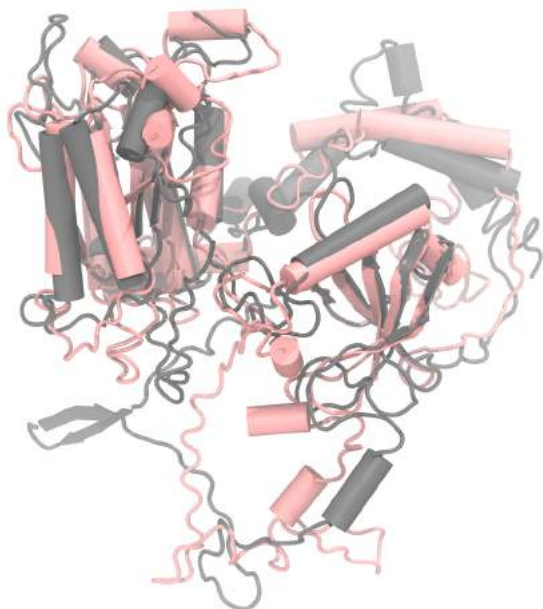

**Model 1 vs Model 2**

RMSD = 5.43 Å

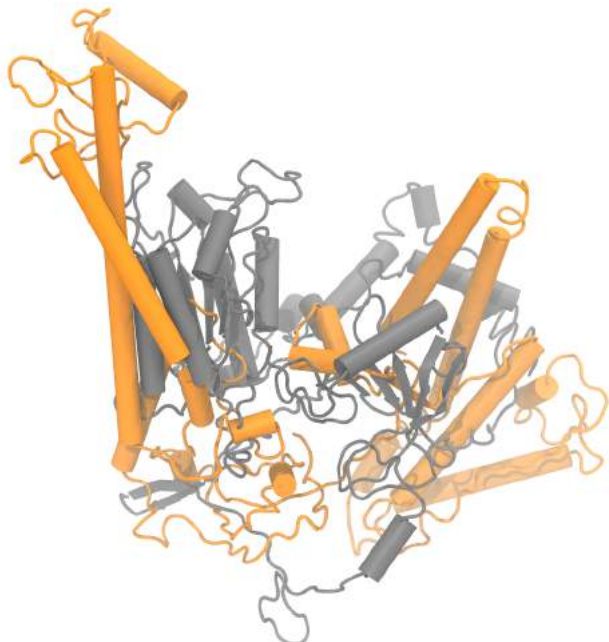

**Model 1 vs Model 3**

RMSD = 34.33 Å

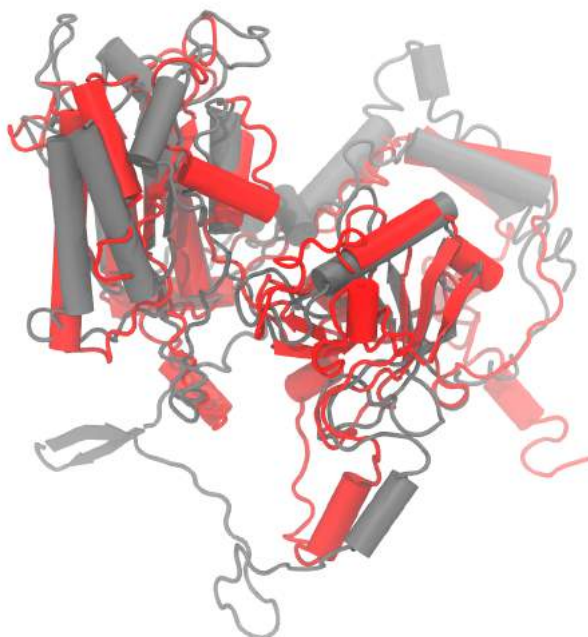

**Model 1 vs Model 4**

RMSD = 5.66 Å

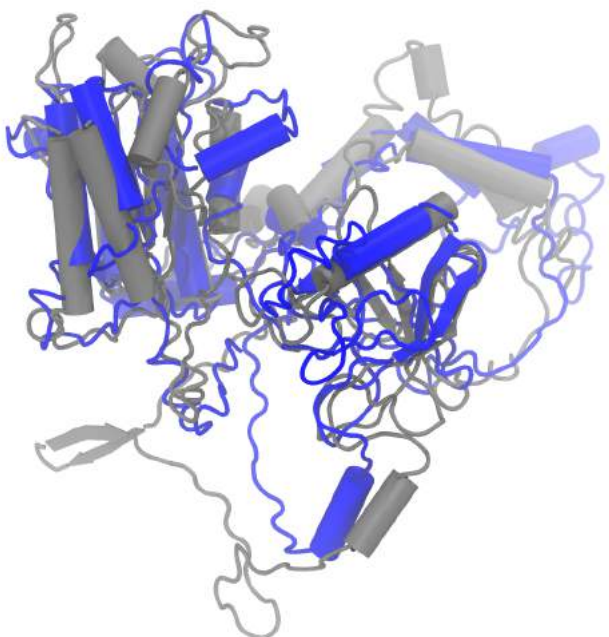

**Model 1 vs Model 5**

RMSD = 7.18 Å

# PRIMO Models

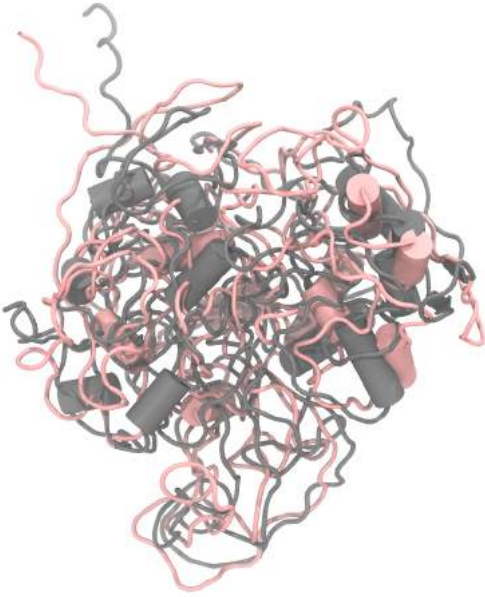

**Model 1 vs Model 2**

RMSD = 6.79 Å

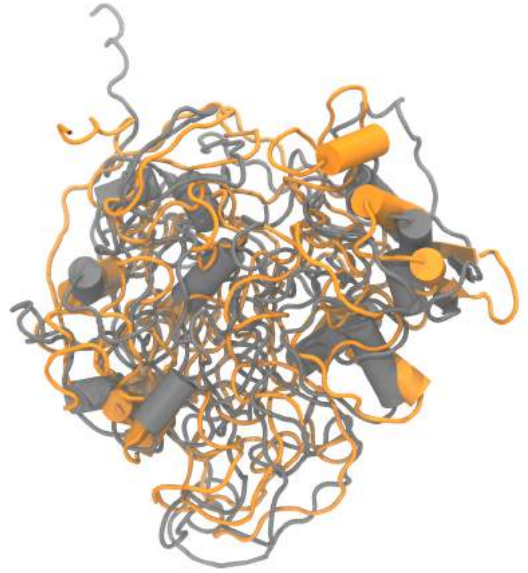

**Model 1 vs Model 3**

RMSD = 6.44 Å

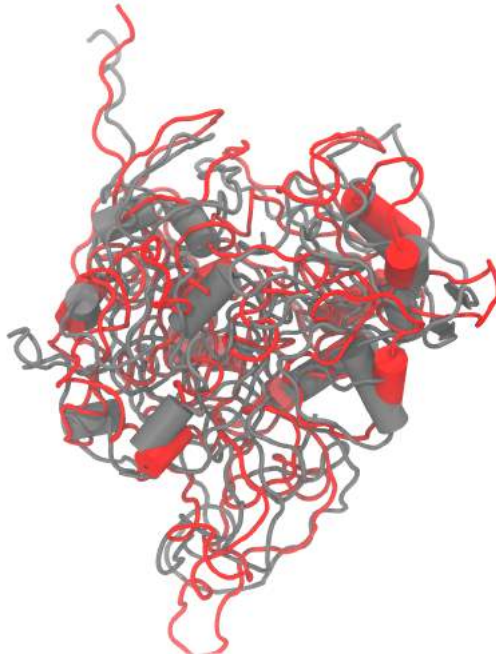

**Model 1 vs Model 4**

RMSD = 7.13 Å

# Robetta Models

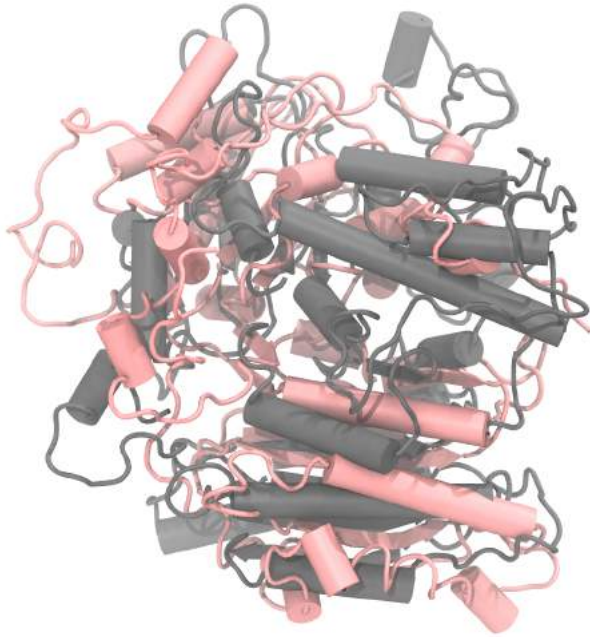

**Model 1 vs Model 2**

RMSD = 17.91 Å

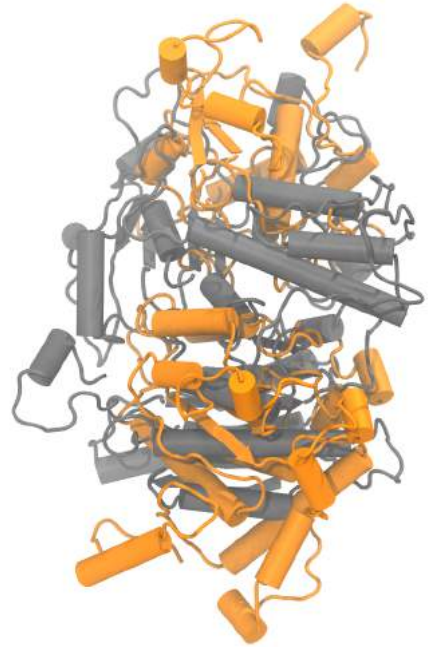

**Model 1 vs Model 3**

RMSD = 26.94 Å

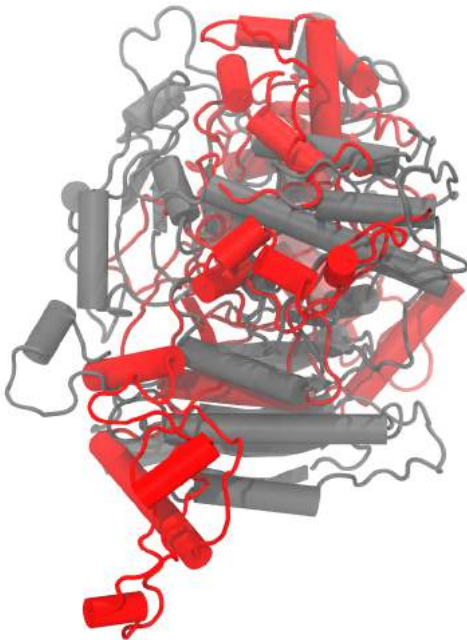

**Model 1 vs Model 4**

RMSD = 31.50 Å

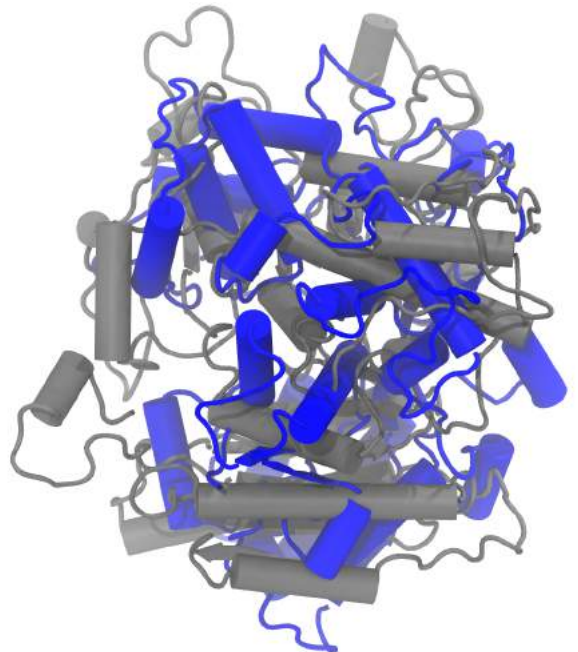

**Model 1 vs Model 5**

RMSD = 22.95 Å

# Robetta-domain Models

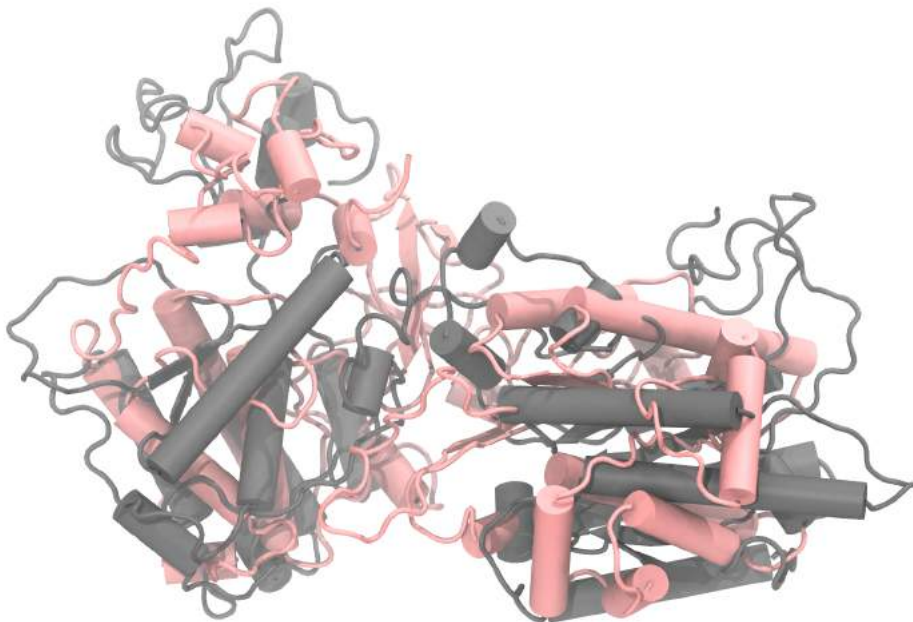

**Model 1 vs Model 2**

RMSD = 22.40 Å

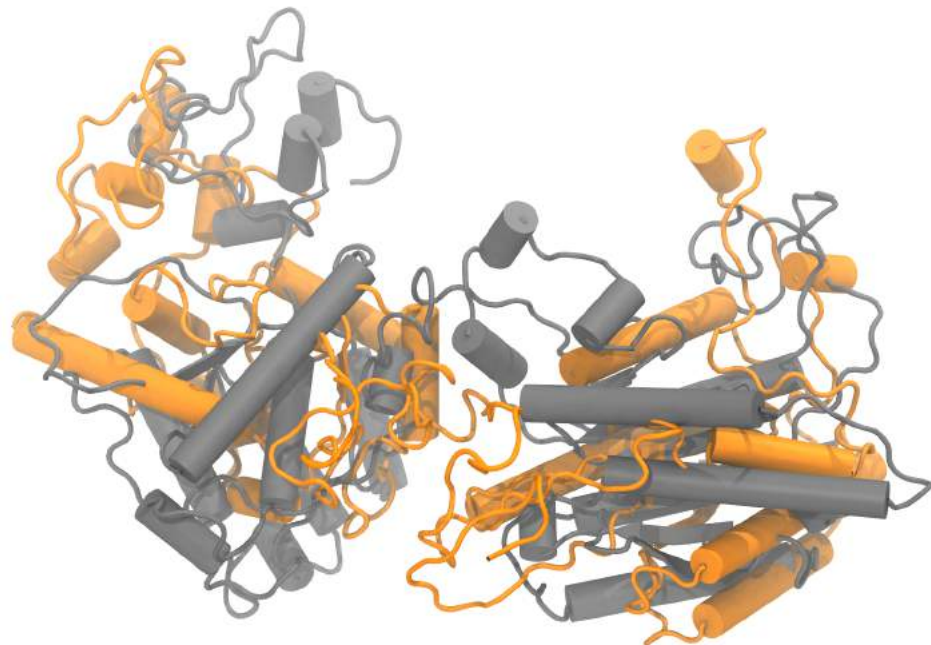

**Model 1 vs Model 3**

RMSD = 24.88 Å

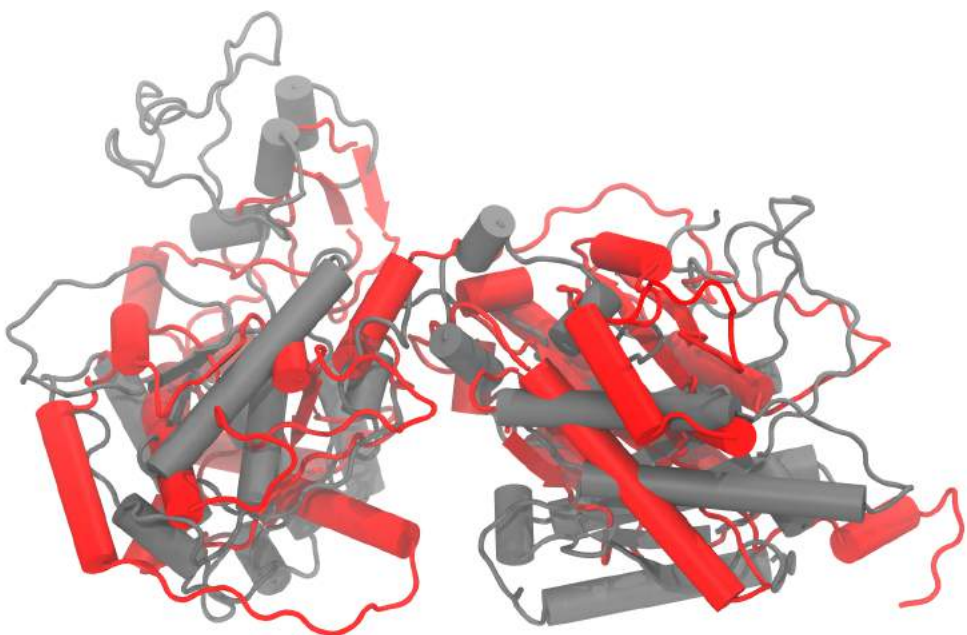

**Model 1 vs Model 4**

RMSD = 20.35 Å

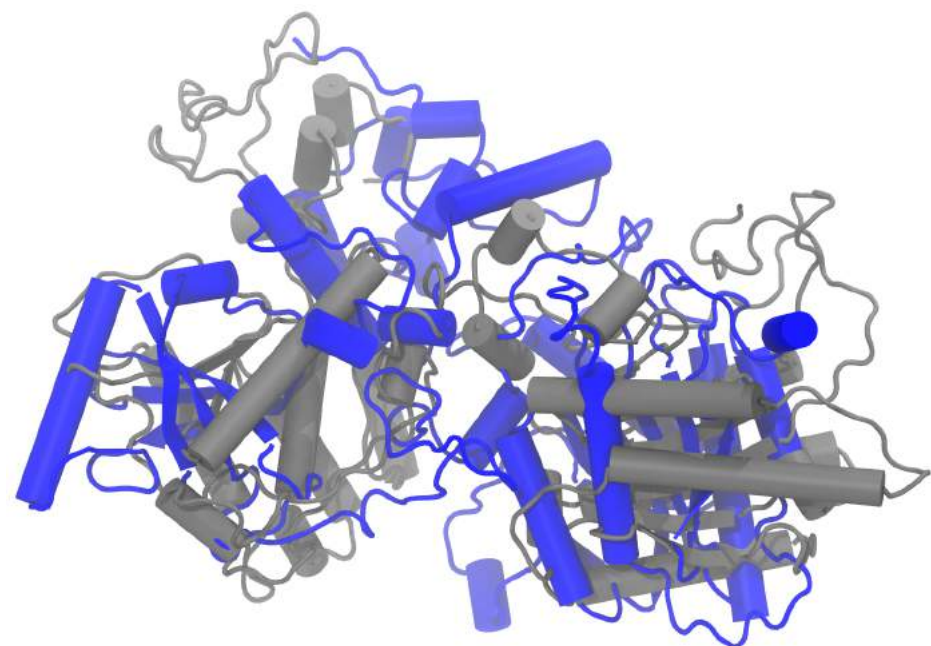

**Model 1 vs Model 5**

RMSD = 25.38 Å
