# Supplementary material for: Structural analysis of M1AP variants associated with severely impaired spermatogenesis causing male infertility
Source: PeerJ journal article supplement (doi:10.7717/peerj.12947), 2022-03-21
Supplement: Figure_S4_EvolutionaryConservation.pdf [file Figure_S4_EvolutionaryConservation.pdf]

1 10 20 30 40 50 60  
Human|Q8TC57|Homo\_sapiens MHPGR<sup>T</sup>TKG<sup>P</sup>ST<sup>H</sup>TQ<sup>I</sup>DQ<sup>P</sup>PRLLI<sup>V</sup>H<sup>I</sup>AL<sup>P</sup>SWA<sup>D</sup>I<sup>T</sup>C<sup>N</sup>LCEALQ<sup>N</sup>FF<sup>S</sup>IAC<sup>S</sup>LMG<sup>P</sup>SR  
Chimpanzee|H2R3U8|Pan\_troglodytes MHPGR<sup>T</sup>TKG<sup>P</sup>ST<sup>H</sup>TQ<sup>I</sup>DQ<sup>P</sup>PRLLI<sup>V</sup>H<sup>I</sup>AL<sup>P</sup>SWA<sup>D</sup>I<sup>T</sup>C<sup>N</sup>LCEALQ<sup>N</sup>FF<sup>S</sup>IAC<sup>S</sup>LMG<sup>P</sup>SR  
Cat|A0A337RXR8|Felis\_catus MYHGR<sup>S</sup>TKG<sup>P</sup>ST<sup>H</sup>TQ<sup>I</sup>YQ<sup>P</sup>PRLLI<sup>V</sup>H<sup>I</sup>AL<sup>P</sup>SWA<sup>D</sup>I<sup>T</sup>C<sup>N</sup>LCEALQ<sup>N</sup>FF<sup>S</sup>IAC<sup>S</sup>LMG<sup>P</sup>SR  
Wild\_boar|A0A5G2QVF2|Sus\_scrofa MYHVP<sup>T</sup>TKG<sup>P</sup>ST<sup>H</sup>TQ<sup>I</sup>YQ<sup>P</sup>PRLLI<sup>V</sup>H<sup>I</sup>AL<sup>P</sup>SWA<sup>D</sup>I<sup>T</sup>C<sup>N</sup>LCEALQ<sup>N</sup>FF<sup>S</sup>IAC<sup>S</sup>LMG<sup>P</sup>SR  
Bovine|E1BF42|Bos\_taurus MHHGQ<sup>M</sup>AS<sup>K</sup>R<sup>P</sup>SN<sup>T</sup>Q<sup>M</sup>YQ<sup>P</sup>PRLLI<sup>V</sup>H<sup>I</sup>AL<sup>P</sup>SWA<sup>D</sup>I<sup>T</sup>C<sup>N</sup>LCEALQ<sup>N</sup>FF<sup>S</sup>IAC<sup>S</sup>LMG<sup>P</sup>SR  
Mouse|Q9Z0E1|Mus\_musculus MNR<sup>R</sup>K<sup>T</sup>SR<sup>G</sup>TS<sup>A</sup>AM<sup>K</sup>IS<sup>H</sup>Q<sup>P</sup>PRLLI<sup>V</sup>N<sup>I</sup>AV<sup>P</sup>SW<sup>D</sup>I<sup>T</sup>C<sup>N</sup>LCEALQ<sup>N</sup>FF<sup>S</sup>IAC<sup>S</sup>LMG<sup>P</sup>SR

☆  
p.Ser50Pro

70 80 90 100 110 120  
Human|Q8TC57|Homo\_sapiens MS<sup>L</sup>FS<sup>L</sup>Y<sup>M</sup>V<sup>Q</sup>D<sup>H</sup>EC<sup>I</sup>LP<sup>F</sup>V<sup>Q</sup>V<sup>K</sup>GN<sup>F</sup>AR<sup>L</sup>Q<sup>T</sup>C<sup>I</sup>SEL<sup>R</sup>ML<sup>Q</sup>REG<sup>C</sup>FR<sup>S</sup>QGA<sup>S</sup>IR<sup>L</sup>LA<sup>V</sup>ED<sup>G</sup>L  
Chimpanzee|H2R3U8|Pan\_troglodytes MS<sup>L</sup>FS<sup>L</sup>Y<sup>M</sup>V<sup>Q</sup>D<sup>H</sup>EC<sup>I</sup>LP<sup>F</sup>V<sup>Q</sup>V<sup>K</sup>GN<sup>F</sup>AR<sup>L</sup>Q<sup>T</sup>C<sup>I</sup>SEL<sup>R</sup>ML<sup>Q</sup>REG<sup>C</sup>FR<sup>S</sup>QGA<sup>S</sup>IR<sup>L</sup>LA<sup>V</sup>ED<sup>G</sup>L  
Cat|A0A337RXR8|Felis\_catus MS<sup>L</sup>FS<sup>L</sup>Y<sup>M</sup>V<sup>Q</sup>N<sup>H</sup>EC<sup>I</sup>LP<sup>F</sup>V<sup>Q</sup>V<sup>K</sup>GN<sup>F</sup>AR<sup>L</sup>Q<sup>T</sup>C<sup>I</sup>SEL<sup>R</sup>TL<sup>Q</sup>EG<sup>C</sup>FR<sup>P</sup>H<sup>S</sup>T<sup>S</sup>I<sup>Q</sup>L<sup>A</sup>V<sup>E</sup>D<sup>G</sup>L  
Wild\_boar|A0A5G2QVF2|Sus\_scrofa MS<sup>L</sup>FS<sup>L</sup>Y<sup>M</sup>V<sup>Q</sup>N<sup>H</sup>EC<sup>I</sup>LP<sup>F</sup>V<sup>Q</sup>V<sup>K</sup>GN<sup>F</sup>AR<sup>L</sup>Q<sup>T</sup>C<sup>I</sup>SEL<sup>R</sup>L<sup>Q</sup>REG<sup>C</sup>FR<sup>P</sup>Q<sup>G</sup>T<sup>S</sup>I<sup>Q</sup>L<sup>A</sup>V<sup>E</sup>D<sup>G</sup>L  
Bovine|E1BF42|Bos\_taurus I<sup>P</sup>LF<sup>S</sup>LI<sup>V</sup>IV<sup>Q</sup>N<sup>H</sup>EC<sup>I</sup>LP<sup>F</sup>V<sup>Q</sup>V<sup>K</sup>GN<sup>F</sup>AR<sup>L</sup>Q<sup>T</sup>C<sup>I</sup>SEL<sup>R</sup>ML<sup>Q</sup>REG<sup>C</sup>FR<sup>P</sup>Q<sup>G</sup>T<sup>S</sup>I<sup>Q</sup>L<sup>A</sup>V<sup>E</sup>D<sup>G</sup>L  
Mouse|Q9Z0E1|Mus\_musculus MS<sup>L</sup>FS<sup>L</sup>Y<sup>M</sup>TV<sup>Q</sup>N<sup>H</sup>EC<sup>I</sup>LV<sup>P</sup>F<sup>V</sup>Q<sup>V</sup>R<sup>G</sup>N<sup>F</sup>IR<sup>L</sup>Q<sup>T</sup>C<sup>I</sup>SEL<sup>R</sup>ML<sup>Q</sup>VE<sup>C</sup>HR<sup>P</sup>PH<sup>A</sup>L<sup>I</sup>PL<sup>A</sup>IE<sup>D</sup>GL

130 140 150 160 170 180  
Human|Q8TC57|Homo\_sapiens Q<sup>O</sup>FK<sup>Q</sup>Y<sup>S</sup>RH<sup>V</sup>T<sup>T</sup>RA<sup>A</sup>LT<sup>Y</sup>TS<sup>L</sup>E<sup>I</sup>T<sup>I</sup>LT<sup>S</sup>Q<sup>P</sup>GKE<sup>V</sup>V<sup>K</sup>Q<sup>L</sup>E<sup>E</sup>GL<sup>K</sup>D<sup>T</sup>DL<sup>A</sup>R<sup>V</sup>RR<sup>F</sup>OV<sup>E</sup>VE<sup>T</sup>K  
Chimpanzee|H2R3U8|Pan\_troglodytes Q<sup>O</sup>FK<sup>Q</sup>Y<sup>S</sup>RH<sup>V</sup>T<sup>T</sup>RA<sup>A</sup>LT<sup>Y</sup>TS<sup>L</sup>E<sup>I</sup>T<sup>I</sup>LT<sup>S</sup>Q<sup>P</sup>GKE<sup>V</sup>V<sup>K</sup>Q<sup>L</sup>E<sup>E</sup>GL<sup>K</sup>D<sup>T</sup>DL<sup>A</sup>R<sup>V</sup>RR<sup>F</sup>OV<sup>E</sup>VE<sup>T</sup>K  
Cat|A0A337RXR8|Felis\_catus Q<sup>O</sup>FK<sup>Q</sup>Y<sup>S</sup>TR<sup>H</sup>V<sup>T</sup>GA<sup>A</sup>LS<sup>Y</sup>TS<sup>L</sup>E<sup>I</sup>T<sup>I</sup>VL<sup>T</sup>S<sup>Q</sup>P<sup>G</sup>KE<sup>V</sup>V<sup>K</sup>Q<sup>L</sup>E<sup>E</sup>GL<sup>K</sup>D<sup>T</sup>DL<sup>V</sup>K<sup>V</sup>RR<sup>L</sup>OV<sup>E</sup>VE<sup>T</sup>K  
Wild\_boar|A0A5G2QVF2|Sus\_scrofa Q<sup>O</sup>FK<sup>Q</sup>Y<sup>S</sup>RH<sup>V</sup>T<sup>T</sup>GA<sup>A</sup>LT<sup>Y</sup>TS<sup>L</sup>E<sup>I</sup>T<sup>I</sup>VL<sup>T</sup>S<sup>Q</sup>P<sup>G</sup>KE<sup>V</sup>V<sup>K</sup>Q<sup>L</sup>E<sup>E</sup>GL<sup>K</sup>D<sup>T</sup>DL<sup>V</sup>R<sup>R</sup>RR<sup>L</sup>OV<sup>E</sup>VE<sup>T</sup>K  
Bovine|E1BF42|Bos\_taurus Q<sup>O</sup>FK<sup>Q</sup>Y<sup>S</sup>RH<sup>M</sup>ST<sup>G</sup>A<sup>A</sup>LT<sup>Y</sup>TS<sup>L</sup>E<sup>I</sup>T<sup>I</sup>VL<sup>T</sup>S<sup>Q</sup>P<sup>G</sup>KE<sup>V</sup>V<sup>K</sup>Q<sup>L</sup>E<sup>E</sup>GL<sup>K</sup>D<sup>T</sup>DL<sup>V</sup>R<sup>I</sup>R<sup>K</sup>L<sup>Q</sup>VE<sup>I</sup>T<sup>K</sup>  
Mouse|Q9Z0E1|Mus\_musculus Q<sup>O</sup>FK<sup>Q</sup>Y<sup>S</sup>SH<sup>M</sup>AS<sup>S</sup>A<sup>A</sup>Q<sup>P</sup>W<sup>T</sup>SL<sup>E</sup>I<sup>T</sup>VL<sup>T</sup>SR<sup>P</sup>GKE<sup>V</sup>V<sup>K</sup>Q<sup>L</sup>E<sup>E</sup>GL<sup>K</sup>D<sup>I</sup>N<sup>L</sup>LS<sup>V</sup>RR<sup>L</sup>Q<sup>V</sup>A<sup>V</sup>E<sup>T</sup>K

190 200 210 220 230 240  
Human|Q8TC57|Homo\_sapiens G<sup>I</sup>LE<sup>H</sup>V<sup>D</sup>S<sup>A</sup>SP<sup>V</sup>ED<sup>T</sup>SN<sup>D</sup>ESS<sup>I</sup>L<sup>G</sup>TD<sup>I</sup>DL<sup>Q</sup>T<sup>I</sup>DN<sup>I</sup>VS<sup>M</sup>E<sup>I</sup>FF<sup>K</sup>AW<sup>L</sup>H<sup>N</sup>S<sup>G</sup>TD<sup>O</sup>E<sup>Q</sup>I<sup>H</sup>LL  
Chimpanzee|H2R3U8|Pan\_troglodytes G<sup>I</sup>LE<sup>H</sup>V<sup>D</sup>S<sup>A</sup>SP<sup>V</sup>ED<sup>T</sup>SN<sup>D</sup>ESS<sup>I</sup>L<sup>G</sup>TD<sup>I</sup>DL<sup>Q</sup>T<sup>I</sup>DN<sup>I</sup>VS<sup>M</sup>E<sup>I</sup>FF<sup>K</sup>AW<sup>L</sup>H<sup>N</sup>S<sup>G</sup>TD<sup>O</sup>E<sup>Q</sup>I<sup>H</sup>LL  
Cat|A0A337RXR8|Felis\_catus G<sup>V</sup>LE<sup>C</sup>MD<sup>S</sup>V<sup>S</sup>P<sup>V</sup>EP<sup>S</sup>DS<sup>S</sup>VL<sup>G</sup>TD<sup>I</sup>DL<sup>Q</sup>T<sup>I</sup>DN<sup>I</sup>V<sup>S</sup>M<sup>E</sup>I<sup>F</sup>FF<sup>K</sup>AW<sup>L</sup>H<sup>N</sup>S<sup>G</sup>TD<sup>O</sup>E<sup>H</sup>I<sup>H</sup>LL  
Wild\_boar|A0A5G2QVF2|Sus\_scrofa G<sup>V</sup>LD<sup>C</sup>VD<sup>S</sup>AS<sup>P</sup>VE<sup>P</sup>S<sup>N</sup>E<sup>S</sup>S<sup>V</sup>L<sup>G</sup>TD<sup>I</sup>DL<sup>Q</sup>T<sup>I</sup>DN<sup>I</sup>V<sup>S</sup>M<sup>E</sup>I<sup>F</sup>FF<sup>K</sup>AW<sup>L</sup>Q<sup>N</sup>S<sup>G</sup>TD<sup>O</sup>E<sup>H</sup>I<sup>H</sup>LL  
Bovine|E1BF42|Bos\_taurus G<sup>V</sup>LE<sup>C</sup>M<sup>N</sup>S<sup>A</sup>SP<sup>V</sup>EP<sup>S</sup>S<sup>N</sup>E<sup>S</sup>S<sup>V</sup>L<sup>A</sup>T<sup>D</sup>I<sup>D</sup>L<sup>Q</sup>T<sup>I</sup>D<sup>S</sup>I<sup>V</sup>S<sup>M</sup>E<sup>I</sup>FF<sup>K</sup>AW<sup>L</sup>H<sup>N</sup>S<sup>G</sup>TD<sup>O</sup>E<sup>H</sup>I<sup>H</sup>LL  
Mouse|Q9Z0E1|Mus\_musculus G<sup>I</sup>Q<sup>E</sup>RS<sup>D</sup>SP<sup>S</sup>PT<sup>E</sup>EP<sup>S</sup>SN<sup>D</sup>ESS<sup>I</sup>LE<sup>A</sup>DI<sup>V</sup>LE<sup>T</sup>LD<sup>N</sup>D<sup>V</sup>S<sup>M</sup>EV<sup>F</sup>FF<sup>K</sup>AW<sup>L</sup>H<sup>N</sup>S<sup>E</sup>TD<sup>O</sup>EN<sup>I</sup>H<sup>L</sup>L

250 260 270 280 290 300  
Human|Q8TC57|Homo\_sapiens L<sup>S</sup>S<sup>Q</sup>CF<sup>S</sup>SN<sup>I</sup>SR<sup>P</sup>RD<sup>N</sup>P<sup>M</sup>CL<sup>K</sup>CD<sup>L</sup>Q<sup>E</sup>RL<sup>L</sup>SP<sup>S</sup>LL<sup>A</sup>GT<sup>A</sup>D<sup>S</sup>SL<sup>R</sup>MD<sup>D</sup>PK<sup>G</sup>DF<sup>I</sup>TL<sup>Y</sup>Q<sup>M</sup>AS<sup>S</sup>Q<sup>S</sup>  
Chimpanzee|H2R3U8|Pan\_troglodytes L<sup>S</sup>S<sup>Q</sup>CF<sup>S</sup>SN<sup>I</sup>SR<sup>P</sup>RD<sup>N</sup>P<sup>M</sup>CL<sup>K</sup>CD<sup>L</sup>Q<sup>E</sup>RL<sup>L</sup>SP<sup>S</sup>LL<sup>A</sup>GT<sup>A</sup>D<sup>S</sup>SL<sup>R</sup>MD<sup>D</sup>PK<sup>G</sup>DF<sup>I</sup>TL<sup>Y</sup>Q<sup>M</sup>AS<sup>S</sup>Q<sup>S</sup>  
Cat|A0A337RXR8|Felis\_catus L<sup>P</sup>SR<sup>C</sup>FS<sup>SN</sup>IS<sup>R</sup>S<sup>G</sup>DS<sup>M</sup>CL<sup>K</sup>CD<sup>L</sup>Q<sup>E</sup>RL<sup>L</sup>SP<sup>S</sup>LL<sup>P</sup>GT<sup>A</sup>D<sup>G</sup>SL<sup>R</sup>MD<sup>D</sup>PK<sup>G</sup>DF<sup>S</sup>TL<sup>Y</sup>Q<sup>M</sup>AS<sup>S</sup>Q<sup>S</sup>  
Wild\_boar|A0A5G2QVF2|Sus\_scrofa L<sup>P</sup>SR<sup>S</sup>FS<sup>SN</sup>IS<sup>R</sup>ARD<sup>N</sup>P<sup>M</sup>CL<sup>K</sup>CD<sup>L</sup>Q<sup>E</sup>RL<sup>L</sup>SP<sup>S</sup>LL<sup>P</sup>GT<sup>A</sup>D<sup>G</sup>SL<sup>R</sup>MD<sup>D</sup>PK<sup>G</sup>DF<sup>S</sup>TL<sup>Y</sup>Q<sup>M</sup>V<sup>S</sup>Q<sup>P</sup>  
Bovine|E1BF42|Bos\_taurus L<sup>P</sup>SR<sup>S</sup>IS<sup>SN</sup>IS<sup>R</sup>T<sup>R</sup>DS<sup>M</sup>CL<sup>K</sup>CD<sup>L</sup>Q<sup>E</sup>RL<sup>L</sup>SP<sup>S</sup>LL<sup>P</sup>GT<sup>A</sup>D<sup>G</sup>SL<sup>R</sup>MD<sup>D</sup>PK<sup>G</sup>DF<sup>S</sup>TL<sup>Y</sup>Q<sup>M</sup>V<sup>S</sup>Q<sup>S</sup>  
Mouse|Q9Z0E1|Mus\_musculus L<sup>T</sup>P<sup>Q</sup>SL<sup>P</sup>PP<sup>S</sup>RA<sup>K</sup>D<sup>H</sup>P<sup>I</sup>CL<sup>K</sup>CD<sup>L</sup>Q<sup>E</sup>RF<sup>L</sup>SP<sup>S</sup>LL<sup>P</sup>GT<sup>A</sup>D<sup>G</sup>VS<sup>R</sup>ID<sup>D</sup>PK<sup>G</sup>D<sup>I</sup>ST<sup>Y</sup>Q<sup>M</sup>AS<sup>S</sup>LA

☆  
p.Arg266Gln

310 320 330 340 350  
Human|Q8TC57|Homo\_sapiens S<sup>A</sup>SH<sup>Y</sup>...K<sup>L</sup>Q<sup>V</sup>IK<sup>A</sup>L<sup>K</sup>SS<sup>G</sup>VC<sup>E</sup>SL<sup>T</sup>Y<sup>G</sup>LP<sup>F</sup>IL<sup>R</sup>PT<sup>S</sup>WC<sup>W</sup>LD<sup>N</sup>DE<sup>L</sup>ET<sup>N</sup>Q<sup>O</sup>H<sup>F</sup>HAL<sup>C</sup>H<sup>S</sup>L  
Chimpanzee|H2R3U8|Pan\_troglodytes S<sup>A</sup>SH<sup>Y</sup>...K<sup>L</sup>Q<sup>V</sup>IK<sup>A</sup>L<sup>K</sup>SS<sup>G</sup>VC<sup>E</sup>SL<sup>T</sup>Y<sup>G</sup>LP<sup>F</sup>IL<sup>R</sup>PT<sup>S</sup>WC<sup>W</sup>LD<sup>N</sup>DE<sup>L</sup>ET<sup>N</sup>Q<sup>O</sup>H<sup>F</sup>HAL<sup>C</sup>H<sup>S</sup>L  
Cat|A0A337RXR8|Felis\_catus S<sup>A</sup>S<sup>C</sup>Y...K<sup>L</sup>R<sup>V</sup>IK<sup>A</sup>L<sup>N</sup>S<sup>G</sup>VC<sup>E</sup>SL<sup>T</sup>Y<sup>G</sup>LP<sup>F</sup>IL<sup>R</sup>PT<sup>S</sup>WC<sup>W</sup>LD<sup>N</sup>DE<sup>L</sup>ET<sup>N</sup>Q<sup>O</sup>H<sup>F</sup>HAL<sup>C</sup>H<sup>S</sup>L  
Wild\_boar|A0A5G2QVF2|Sus\_scrofa S<sup>A</sup>CH<sup>P</sup>V<sup>I</sup>KL<sup>R</sup>V<sup>I</sup>K<sup>A</sup>L<sup>K</sup>SS<sup>G</sup>VC<sup>E</sup>SL<sup>T</sup>Y<sup>G</sup>LP<sup>F</sup>IL<sup>R</sup>PT<sup>S</sup>WC<sup>W</sup>LD<sup>N</sup>DE<sup>L</sup>ET<sup>N</sup>Q<sup>O</sup>H<sup>F</sup>HAL<sup>C</sup>H<sup>S</sup>L  
Bovine|E1BF42|Bos\_taurus P<sup>A</sup>SC<sup>Y</sup>...K<sup>L</sup>R<sup>V</sup>IK<sup>A</sup>L<sup>K</sup>SS<sup>G</sup>VC<sup>E</sup>SL<sup>T</sup>Y<sup>G</sup>LP<sup>F</sup>IL<sup>R</sup>PT<sup>S</sup>WC<sup>W</sup>LD<sup>N</sup>DE<sup>L</sup>ET<sup>N</sup>Q<sup>O</sup>H<sup>F</sup>HAL<sup>C</sup>H<sup>S</sup>L  
Mouse|Q9Z0E1|Mus\_musculus S<sup>A</sup>SP<sup>Y</sup>...K<sup>L</sup>Q<sup>V</sup>IK<sup>A</sup>L<sup>K</sup>SS<sup>G</sup>VC<sup>E</sup>SL<sup>T</sup>Y<sup>G</sup>LP<sup>F</sup>IL<sup>R</sup>PT<sup>S</sup>WC<sup>W</sup>LD<sup>N</sup>DE<sup>L</sup>ET<sup>N</sup>Q<sup>O</sup>H<sup>F</sup>HAL<sup>C</sup>H<sup>S</sup>L

☆  
p.Gly317Arg

360 370 380 390 400 410  
Human|Q8TC57|Homo\_sapiens L<sup>K</sup>RE<sup>W</sup>LL<sup>L</sup>AK<sup>G</sup>EP<sup>P</sup>GP<sup>G</sup>HS<sup>Q</sup>RI<sup>P</sup>AST<sup>F</sup>Y<sup>V</sup>IM<sup>P</sup>SR<sup>L</sup>SL<sup>L</sup>LV<sup>K</sup>AV<sup>A</sup>TREL<sup>M</sup>LP<sup>S</sup>TF<sup>P</sup>LL<sup>P</sup>ED  
Chimpanzee|H2R3U8|Pan\_troglodytes L<sup>K</sup>RE<sup>W</sup>LL<sup>L</sup>AK<sup>G</sup>EP<sup>L</sup>GP<sup>G</sup>HS<sup>Q</sup>RI<sup>P</sup>AST<sup>F</sup>Y<sup>V</sup>IM<sup>P</sup>SR<sup>L</sup>SL<sup>L</sup>LV<sup>K</sup>AV<sup>A</sup>TREL<sup>M</sup>LP<sup>S</sup>TF<sup>P</sup>LL<sup>P</sup>ED  
Cat|A0A337RXR8|Felis\_catus L<sup>K</sup>RE<sup>W</sup>LL<sup>L</sup>AK<sup>G</sup>EP<sup>L</sup>SG<sup>G</sup>HS<sup>L</sup>T<sup>P</sup>AST<sup>F</sup>Y<sup>V</sup>IV<sup>I</sup>PS<sup>R</sup>SL<sup>L</sup>TL<sup>L</sup>V<sup>K</sup>AV<sup>A</sup>TREL<sup>M</sup>LP<sup>S</sup>TF<sup>P</sup>LL<sup>P</sup>ED  
Wild\_boar|A0A5G2QVF2|Sus\_scrofa L<sup>K</sup>RE<sup>W</sup>LL<sup>L</sup>AK<sup>G</sup>EP<sup>L</sup>SP<sup>G</sup>PS<sup>L</sup>REP<sup>A</sup>ST<sup>F</sup>Y<sup>V</sup>IM<sup>V</sup>PS<sup>R</sup>SP<sup>L</sup>LL<sup>V</sup>KAV<sup>A</sup>TREL<sup>M</sup>LP<sup>S</sup>TF<sup>P</sup>LL<sup>P</sup>ED  
Bovine|E1BF42|Bos\_taurus L<sup>K</sup>RE<sup>W</sup>LL<sup>L</sup>AK<sup>G</sup>EP<sup>L</sup>LN<sup>R</sup>E<sup>H</sup>K<sup>I</sup>REP<sup>A</sup>ST<sup>F</sup>Y<sup>V</sup>IL<sup>P</sup>SP<sup>S</sup>TL<sup>L</sup>V<sup>K</sup>AV<sup>A</sup>TREL<sup>M</sup>LP<sup>S</sup>TF<sup>P</sup>LL<sup>P</sup>ED  
Mouse|Q9Z0E1|Mus\_musculus L<sup>K</sup>RD<sup>W</sup>LL<sup>L</sup>AK<sup>G</sup>EPI<sup>I</sup>H<sup>K</sup>N<sup>Q</sup>SL<sup>I</sup>PAC<sup>S</sup>F<sup>V</sup>IT<sup>P</sup>SP<sup>S</sup>SL<sup>L</sup>TL<sup>L</sup>V<sup>K</sup>AV<sup>A</sup>TREL<sup>M</sup>LP<sup>S</sup>TF<sup>P</sup>LL<sup>S</sup>ED

☆  
p.Pro389Leu

420 430 440 450 460 470  
Human|Q8TC57|Homo\_sapiens P<sup>H</sup>DD<sup>S</sup>L<sup>K</sup>N<sup>V</sup>ES<sup>M</sup>LD<sup>S</sup>LE<sup>L</sup>EP<sup>T</sup>YN<sup>P</sup>L<sup>H</sup>V<sup>Q</sup>SH<sup>L</sup>Y<sup>S</sup>H<sup>L</sup>SS<sup>I</sup>Y<sup>A</sup>K<sup>P</sup>Q<sup>R</sup>L<sup>H</sup>PH<sup>W</sup>ES<sup>R</sup>AP<sup>R</sup>K<sup>H</sup>PC  
Chimpanzee|H2R3U8|Pan\_troglodytes P<sup>H</sup>DD<sup>S</sup>L<sup>K</sup>N<sup>V</sup>ES<sup>M</sup>LD<sup>S</sup>LE<sup>L</sup>EP<sup>T</sup>YN<sup>P</sup>L<sup>H</sup>V<sup>Q</sup>SH<sup>L</sup>Y<sup>S</sup>H<sup>L</sup>SS<sup>I</sup>Y<sup>A</sup>K<sup>P</sup>Q<sup>R</sup>L<sup>H</sup>PH<sup>W</sup>ES<sup>R</sup>AP<sup>R</sup>K<sup>H</sup>PC  
Cat|A0A337RXR8|Felis\_catus P<sup>T</sup>DV<sup>S</sup>L<sup>K</sup>T<sup>V</sup>ER<sup>V</sup>LD<sup>S</sup>LE<sup>L</sup>EP<sup>T</sup>YN<sup>P</sup>L<sup>H</sup>V<sup>Q</sup>SH<sup>L</sup>Y<sup>S</sup>H<sup>L</sup>SS<sup>N</sup>TL<sup>T</sup>K<sup>L</sup>Q<sup>R</sup>I<sup>Q</sup>PS<sup>L</sup>ES<sup>R</sup>AL<sup>R</sup>K<sup>H</sup>PC  
Wild\_boar|A0A5G2QVF2|Sus\_scrofa P<sup>M</sup>DA<sup>S</sup>L<sup>K</sup>T<sup>V</sup>EM<sup>M</sup>LD<sup>L</sup>LE<sup>L</sup>DS<sup>I</sup>YN<sup>P</sup>L<sup>Q</sup>V<sup>W</sup>SH<sup>L</sup>Y<sup>S</sup>H<sup>L</sup>SS<sup>N</sup>TF<sup>A</sup>K<sup>P</sup>Q<sup>R</sup>L<sup>Q</sup>PS<sup>S</sup>W<sup>A</sup>L<sup>R</sup>PP<sup>R</sup>  
Bovine|E1BF42|Bos\_taurus P<sup>P</sup>DA<sup>S</sup>L<sup>K</sup>T<sup>V</sup>ES<sup>M</sup>LD<sup>L</sup>LE<sup>L</sup>ES<sup>I</sup>YN<sup>P</sup>L<sup>E</sup>V<sup>W</sup>SH<sup>L</sup>Y<sup>S</sup>H<sup>L</sup>SS<sup>N</sup>TF<sup>A</sup>NP<sup>H</sup>GR<sup>F</sup>PH<sup>S</sup>SK<sup>S</sup>RA<sup>V</sup>R<sup>K</sup>...  
Mouse|Q9Z0E1|Mus\_musculus P<sup>P</sup>ED<sup>S</sup>L<sup>K</sup>I<sup>E</sup>ST<sup>L</sup>LD<sup>L</sup>GL<sup>T</sup>YN<sup>P</sup>L<sup>H</sup>V<sup>Q</sup>SH<sup>L</sup>Y<sup>S</sup>H<sup>L</sup>SS<sup>A</sup>H<sup>A</sup>K<sup>P</sup>Q<sup>R</sup>L<sup>Y</sup>T<sup>S</sup>CA<sup>S</sup>R<sup>G</sup>L<sup>R</sup>K

☆  
p.Leu430Pro

480 490 500 510 520  
Human|Q8TC57|Homo\_sapiens K<sup>T</sup>G<sup>Q</sup>L<sup>Q</sup>T<sup>N</sup>RR<sup>A</sup>V<sup>A</sup>PL<sup>P</sup>MT<sup>P</sup>VP<sup>G</sup>RA<sup>S</sup>K<sup>M</sup>PA<sup>A</sup>SK<sup>S</sup>SS<sup>D</sup>AF<sup>F</sup>LP<sup>S</sup>EW<sup>E</sup>K...D<sup>P</sup>SR  
Chimpanzee|H2R3U8|Pan\_troglodytes K<sup>T</sup>G<sup>Q</sup>L<sup>Q</sup>T<sup>N</sup>RR<sup>A</sup>V<sup>A</sup>PL<sup>P</sup>MT<sup>P</sup>VP<sup>G</sup>RA<sup>S</sup>K<sup>M</sup>PA<sup>A</sup>SK<sup>S</sup>SS<sup>D</sup>AF<sup>F</sup>LP<sup>S</sup>EW<sup>E</sup>K...D<sup>P</sup>SR  
Cat|A0A337RXR8|Felis\_catus K<sup>A</sup>G<sup>Q</sup>L<sup>Q</sup>T<sup>N</sup>RR<sup>V</sup>RA<sup>V</sup>AP<sup>L</sup>PM<sup>T</sup>VP<sup>G</sup>RA<sup>P</sup>R<sup>M</sup>PA<sup>A</sup>SK<sup>S</sup>SS<sup>D</sup>AF<sup>F</sup>LP<sup>S</sup>EW<sup>E</sup>K...Y<sup>P</sup>SG  
Wild\_boar|A0A5G2QVF2|Sus\_scrofa K<sup>A</sup>G<sup>Q</sup>L<sup>Q</sup>T<sup>N</sup>SR<sup>V</sup>RA<sup>V</sup>AP<sup>L</sup>PM<sup>T</sup>VP<sup>G</sup>RA<sup>P</sup>R<sup>M</sup>PA<sup>A</sup>SK<sup>S</sup>SS<sup>D</sup>AF<sup>F</sup>LP<sup>S</sup>EW<sup>E</sup>K...KEE<sup>W</sup>SG  
Bovine|E1BF42|Bos\_taurus .A<sup>Q</sup>P<sup>L</sup>Q<sup>I</sup>IN<sup>R</sup>VR<sup>A</sup>V<sup>A</sup>PL<sup>P</sup>MT<sup>P</sup>VP<sup>G</sup>RA<sup>P</sup>GR<sup>M</sup>PA<sup>A</sup>SK<sup>A</sup>SS<sup>E</sup>V<sup>F</sup>FP<sup>M</sup>EE<sup>K</sup>EEEE<sup>E</sup>EE<sup>V</sup>PL<sup>G</sup>  
Mouse|Q9Z0E1|Mus\_musculus .G<sup>Q</sup>L<sup>Q</sup>T<sup>N</sup>RR<sup>V</sup>RA<sup>V</sup>AP<sup>L</sup>VP<sup>A</sup>PP<sup>R</sup>RA<sup>L</sup>K<sup>M</sup>TA<sup>A</sup>SK<sup>A</sup>SS<sup>A</sup>AF<sup>L</sup>.P<sup>S</sup>D<sup>S</sup>E<sup>G</sup>...EE<sup>E</sup>R<sup>P</sup>SH

530

Human|Q8TC57|Homo\_sapiens P  
Chimpanzee|H2R3U8|Pan\_troglodytes P  
Cat|A0A337RXR8|Felis\_catus P  
Wild\_boar|A0A5G2QVF2|Sus\_scrofa P  
Bovine|E1BF42|Bos\_taurus P  
Mouse|Q9Z0E1|Mus\_musculus T
