# Supplementary material for: Structural analysis of M1AP variants associated with severely impaired spermatogenesis causing male infertility
Source: PeerJ journal article supplement (doi:10.7717/peerj.12947), 2022-03-21

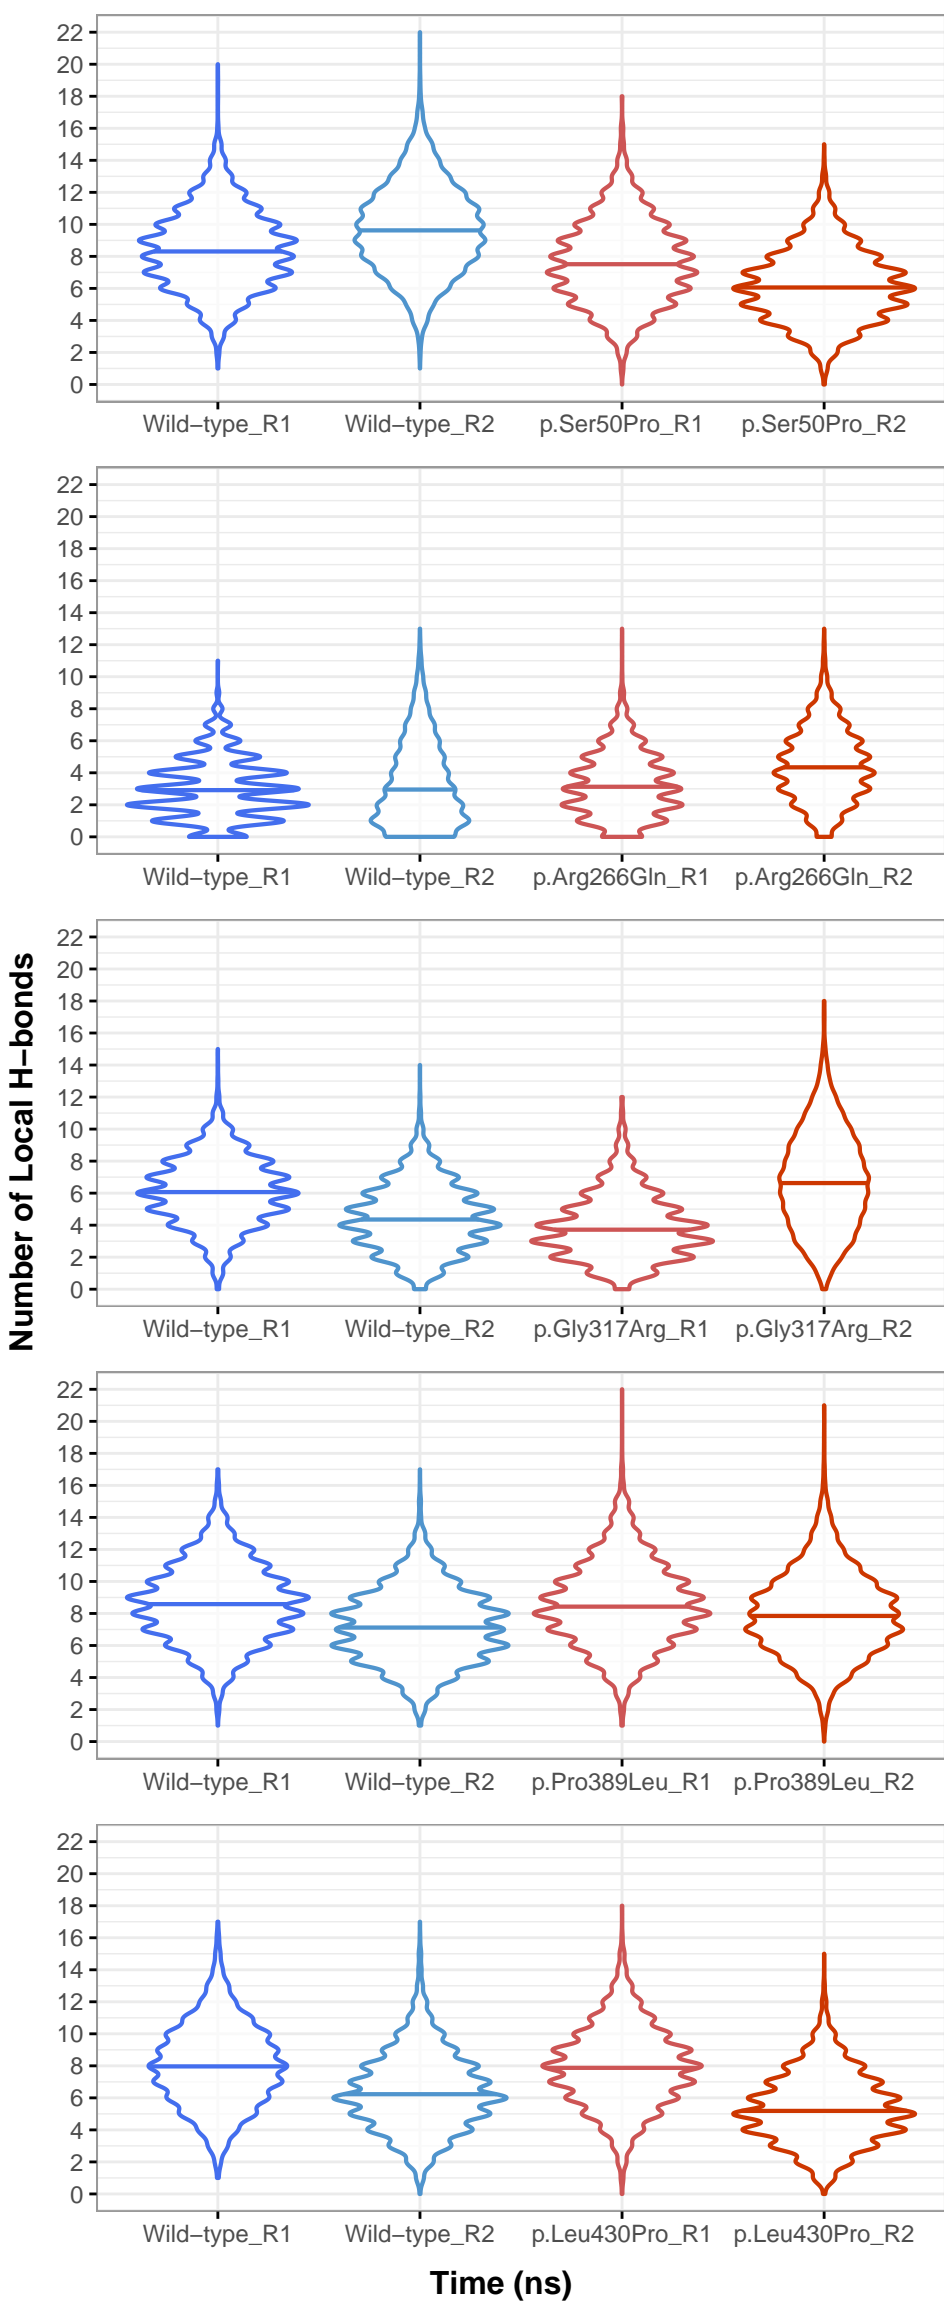

Supplement: Figure_S7_numberOfLocalHbonds.pdf [file Figure_S7_numberOfLocalHbonds.pdf]
