# Supplementary material for: Structural analysis of M1AP variants associated with severely impaired spermatogenesis causing male infertility
Source: PeerJ journal article supplement (doi:10.7717/peerj.12947), 2022-03-21

p.Ser50Pro Wild-type

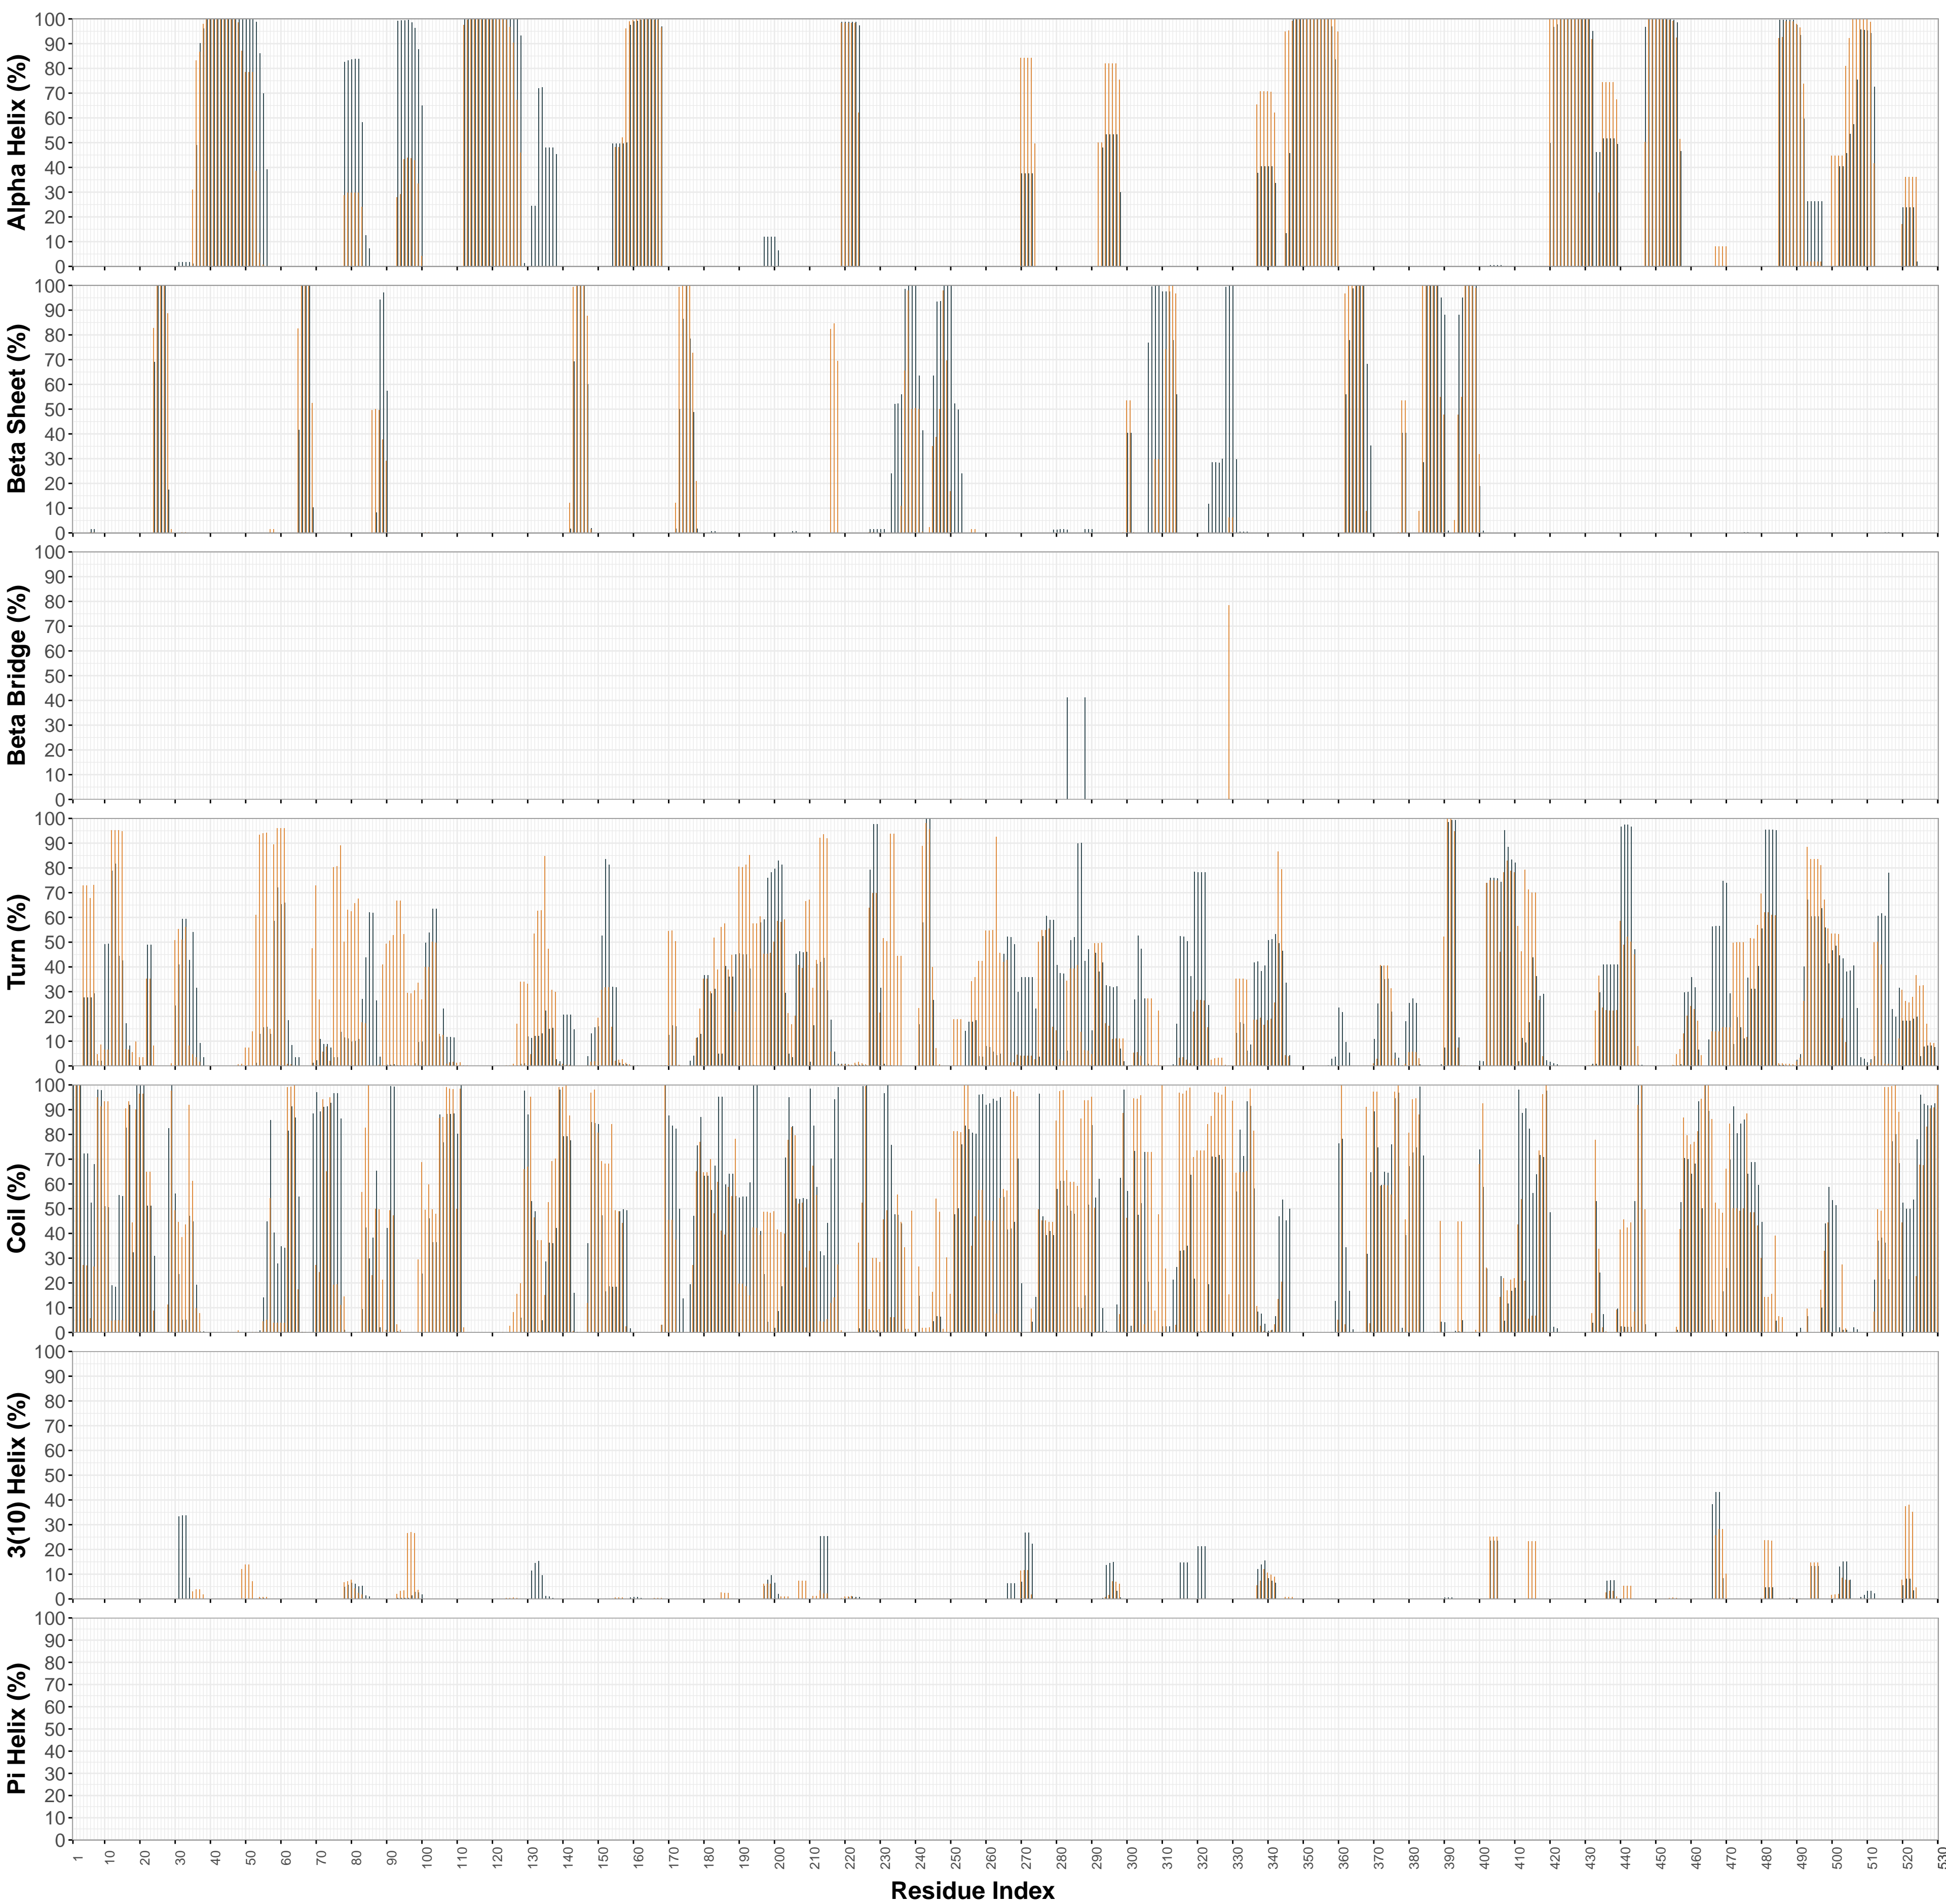

p.Arg266Gln Wild-type

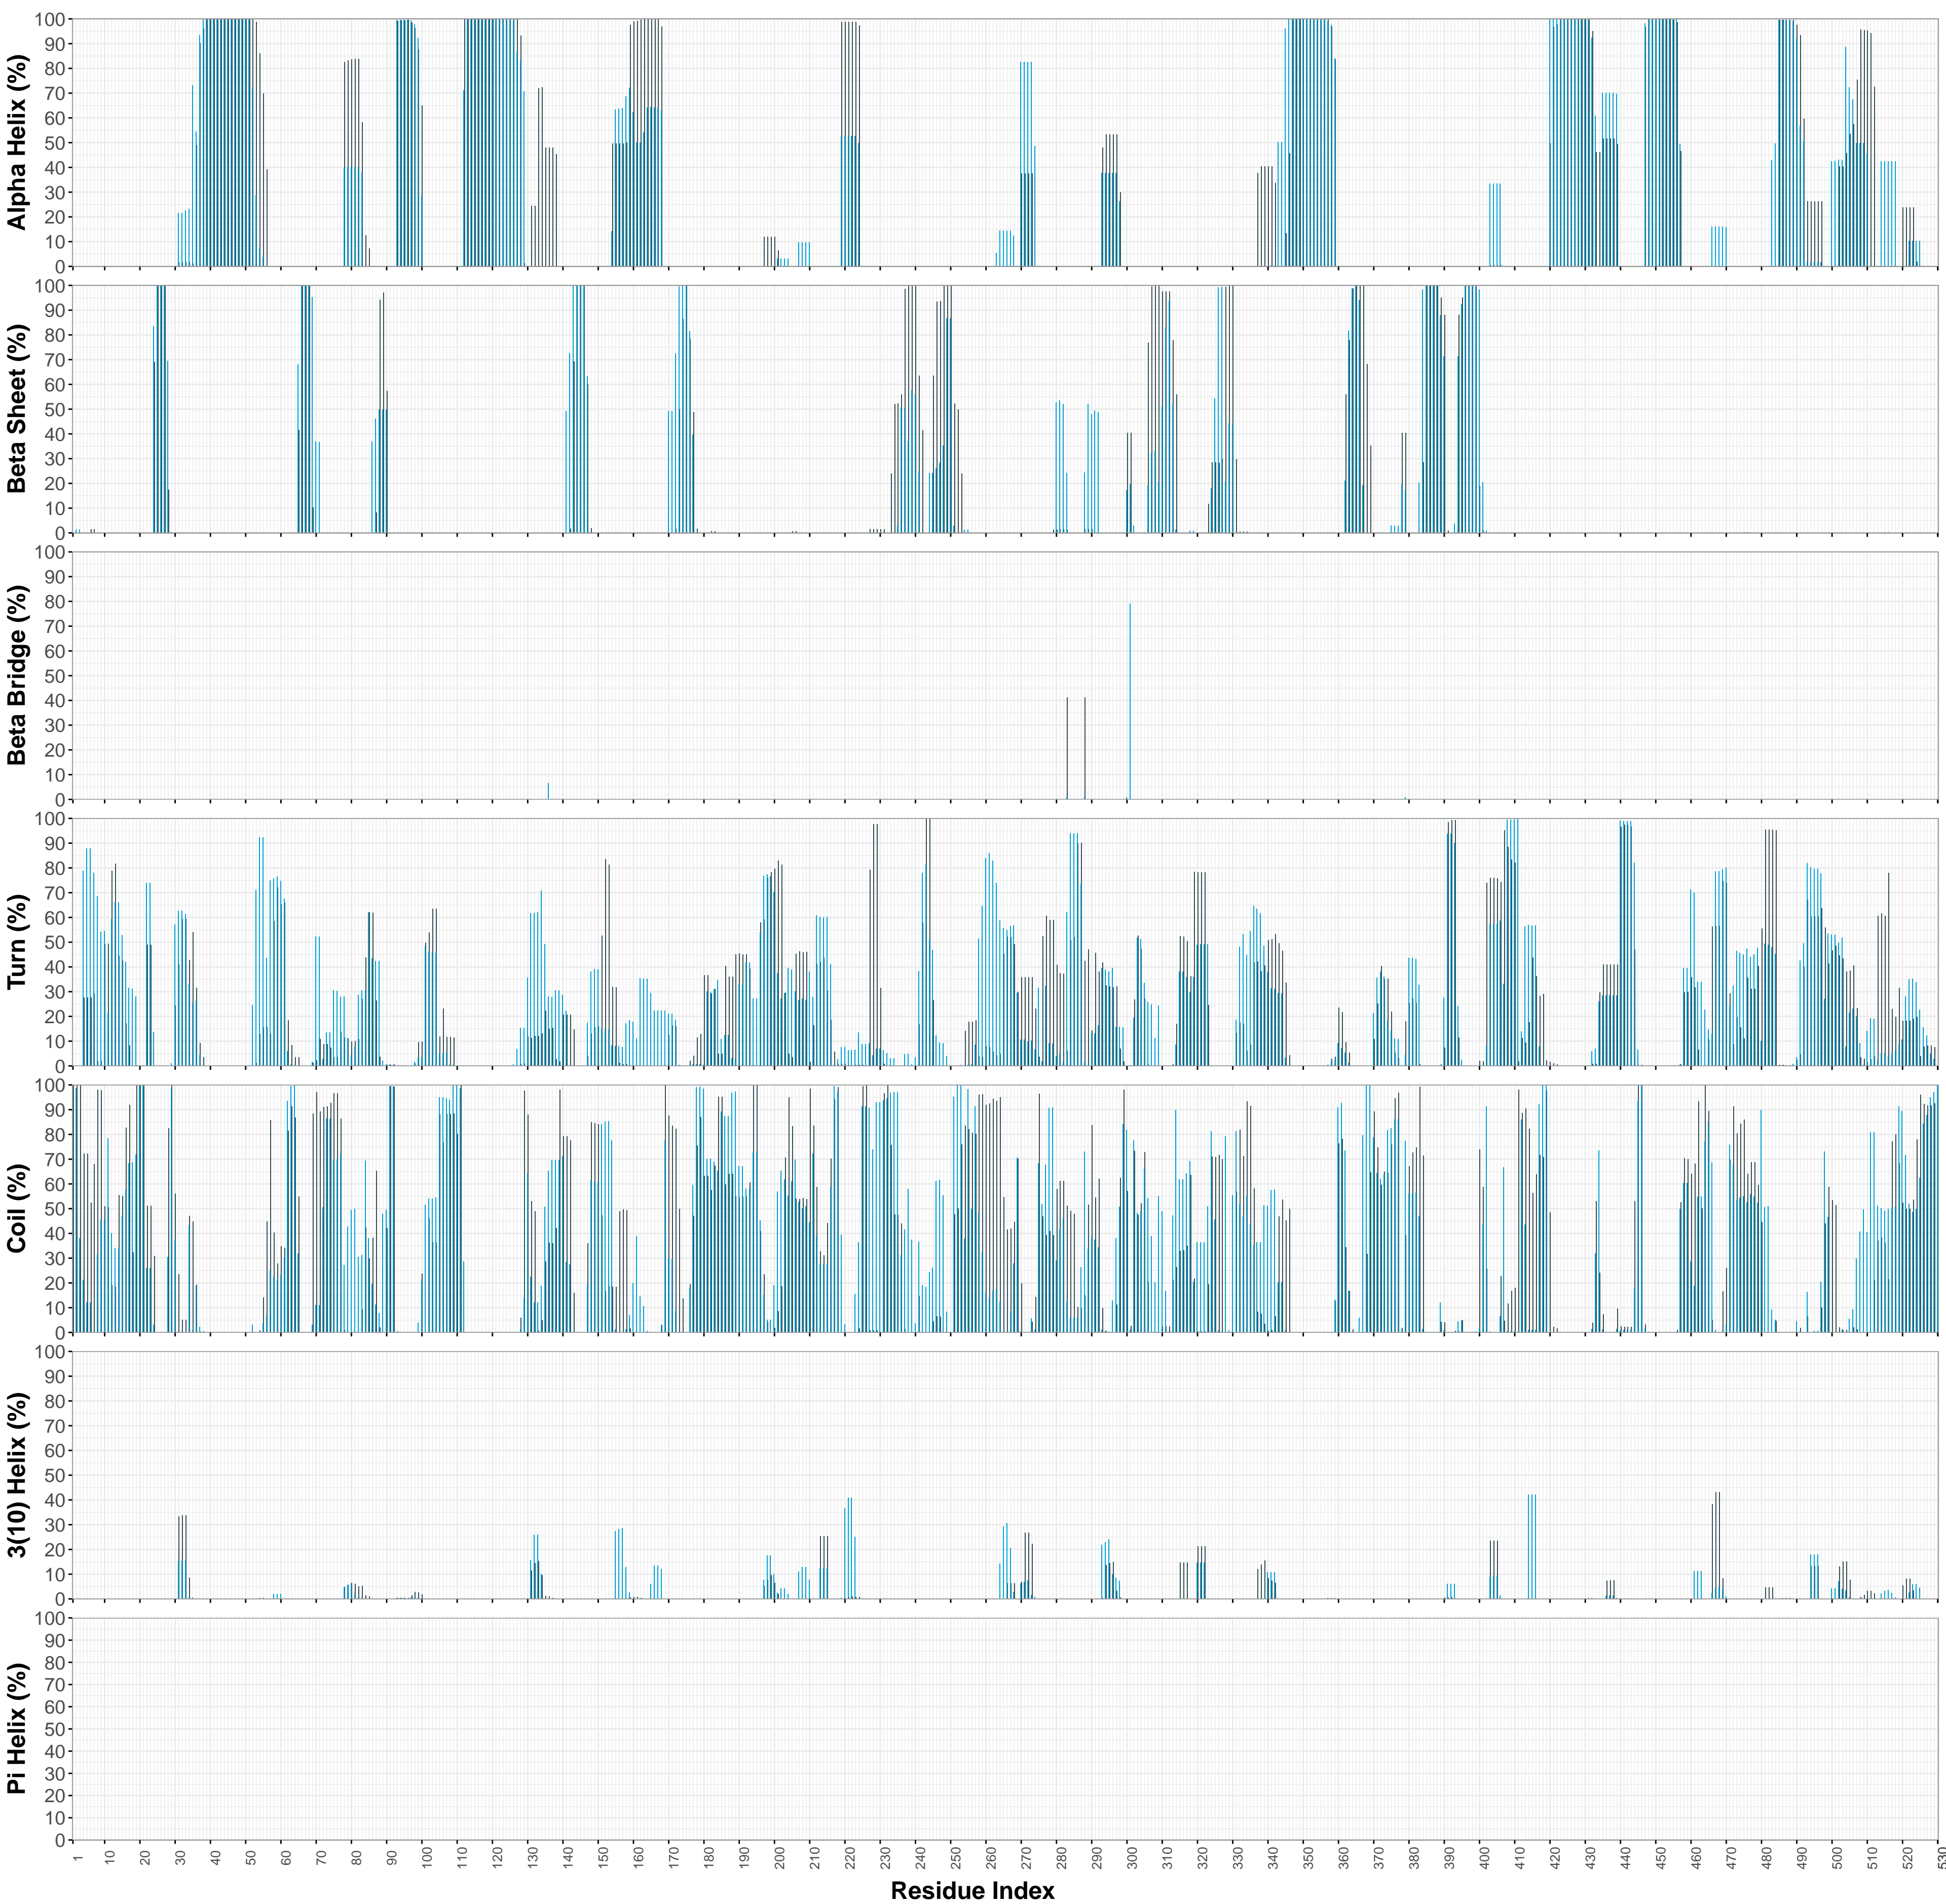

p.Gly317Arg Wild-type

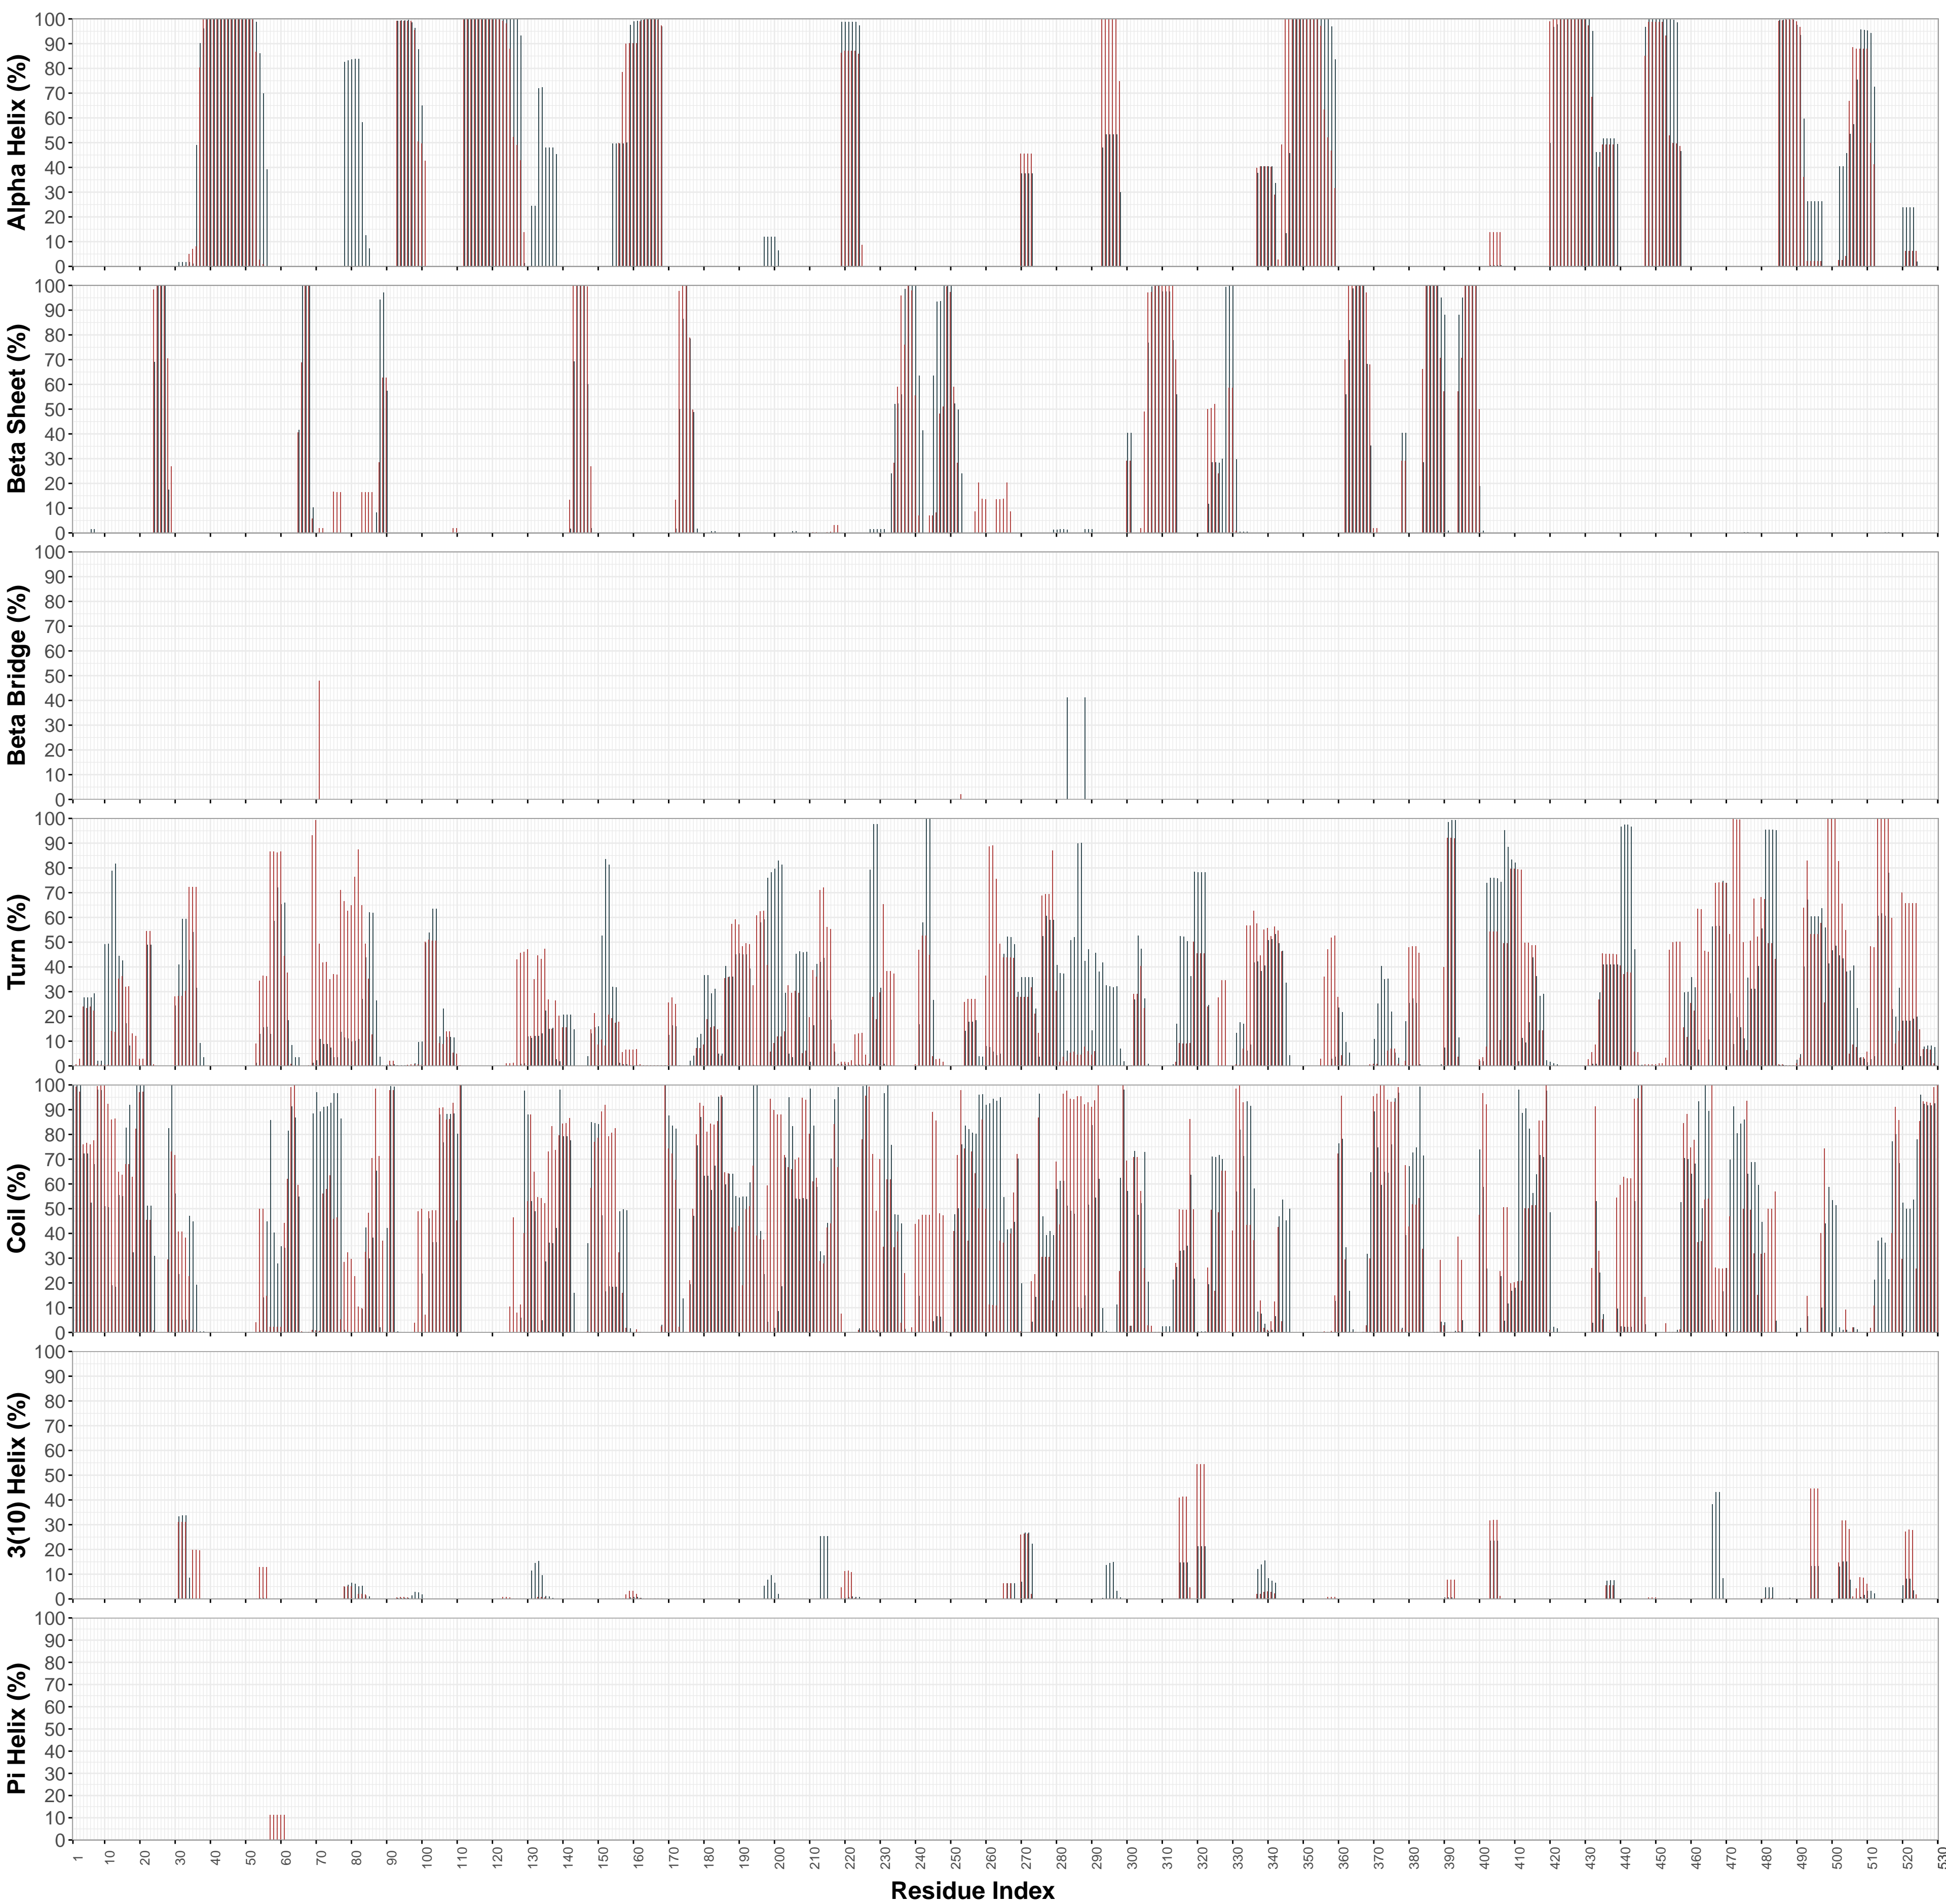

p.Pro389Leu Wild-type

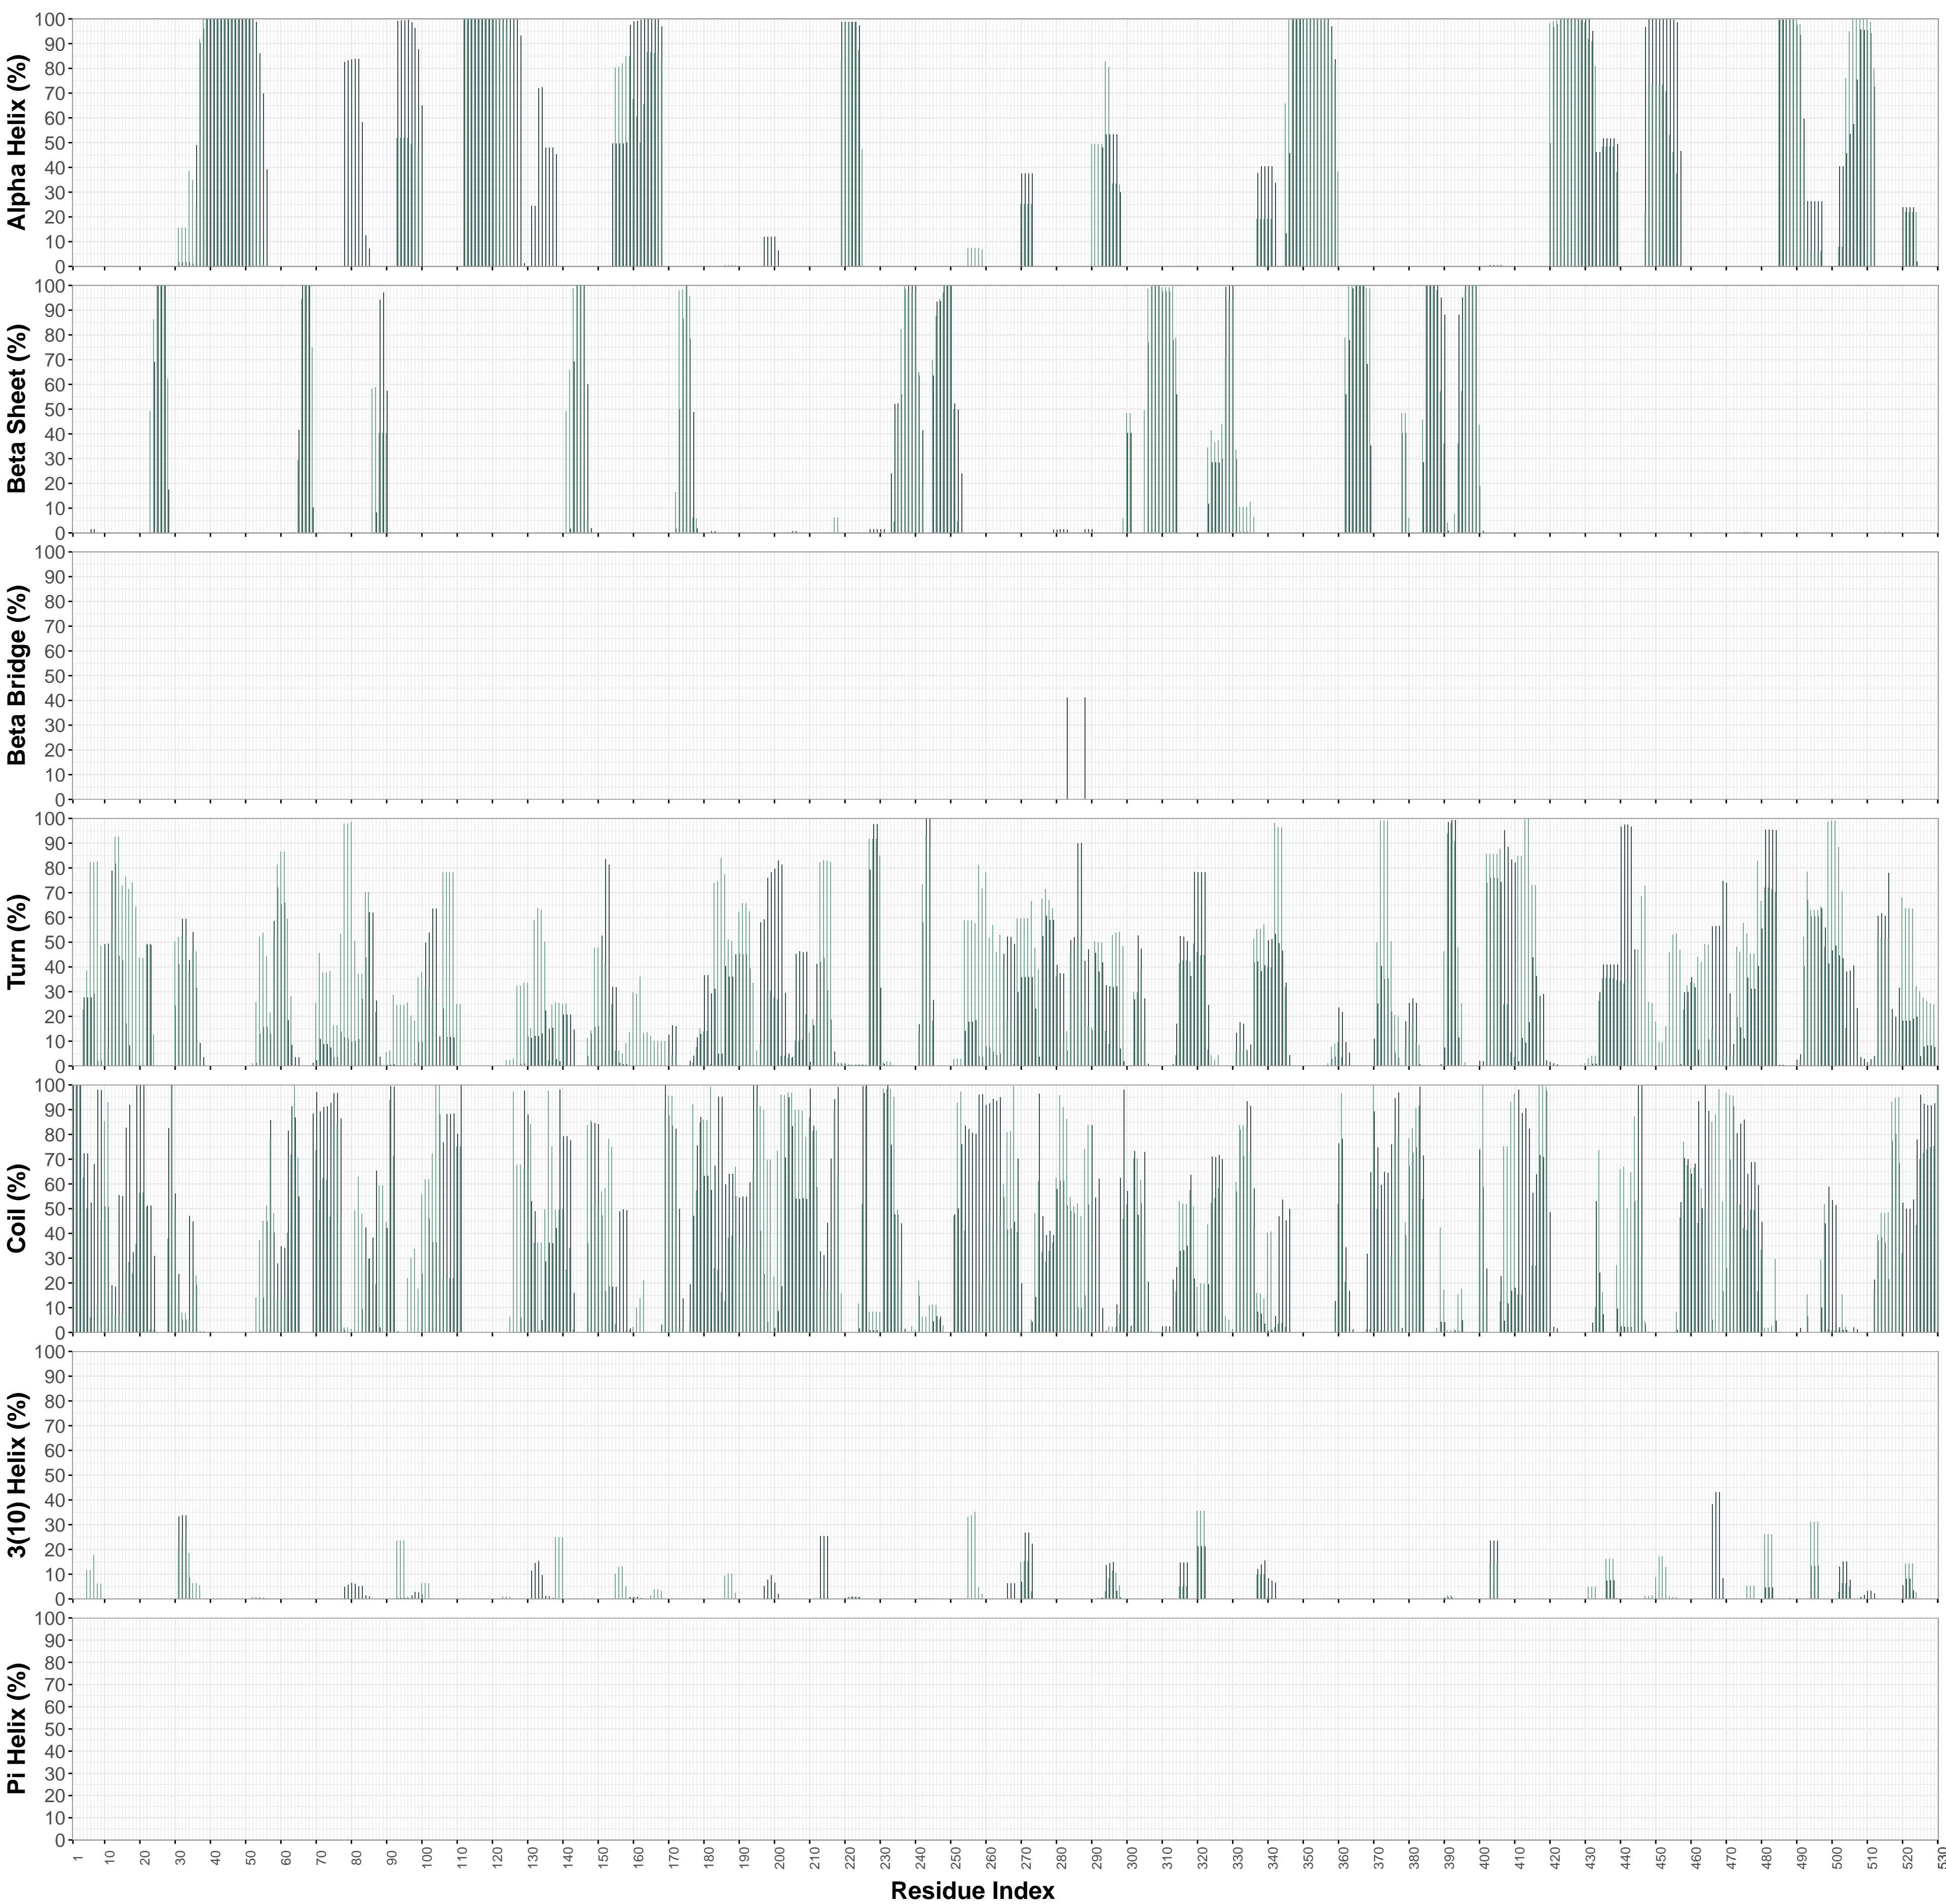

p.Leu430Pro Wild-type

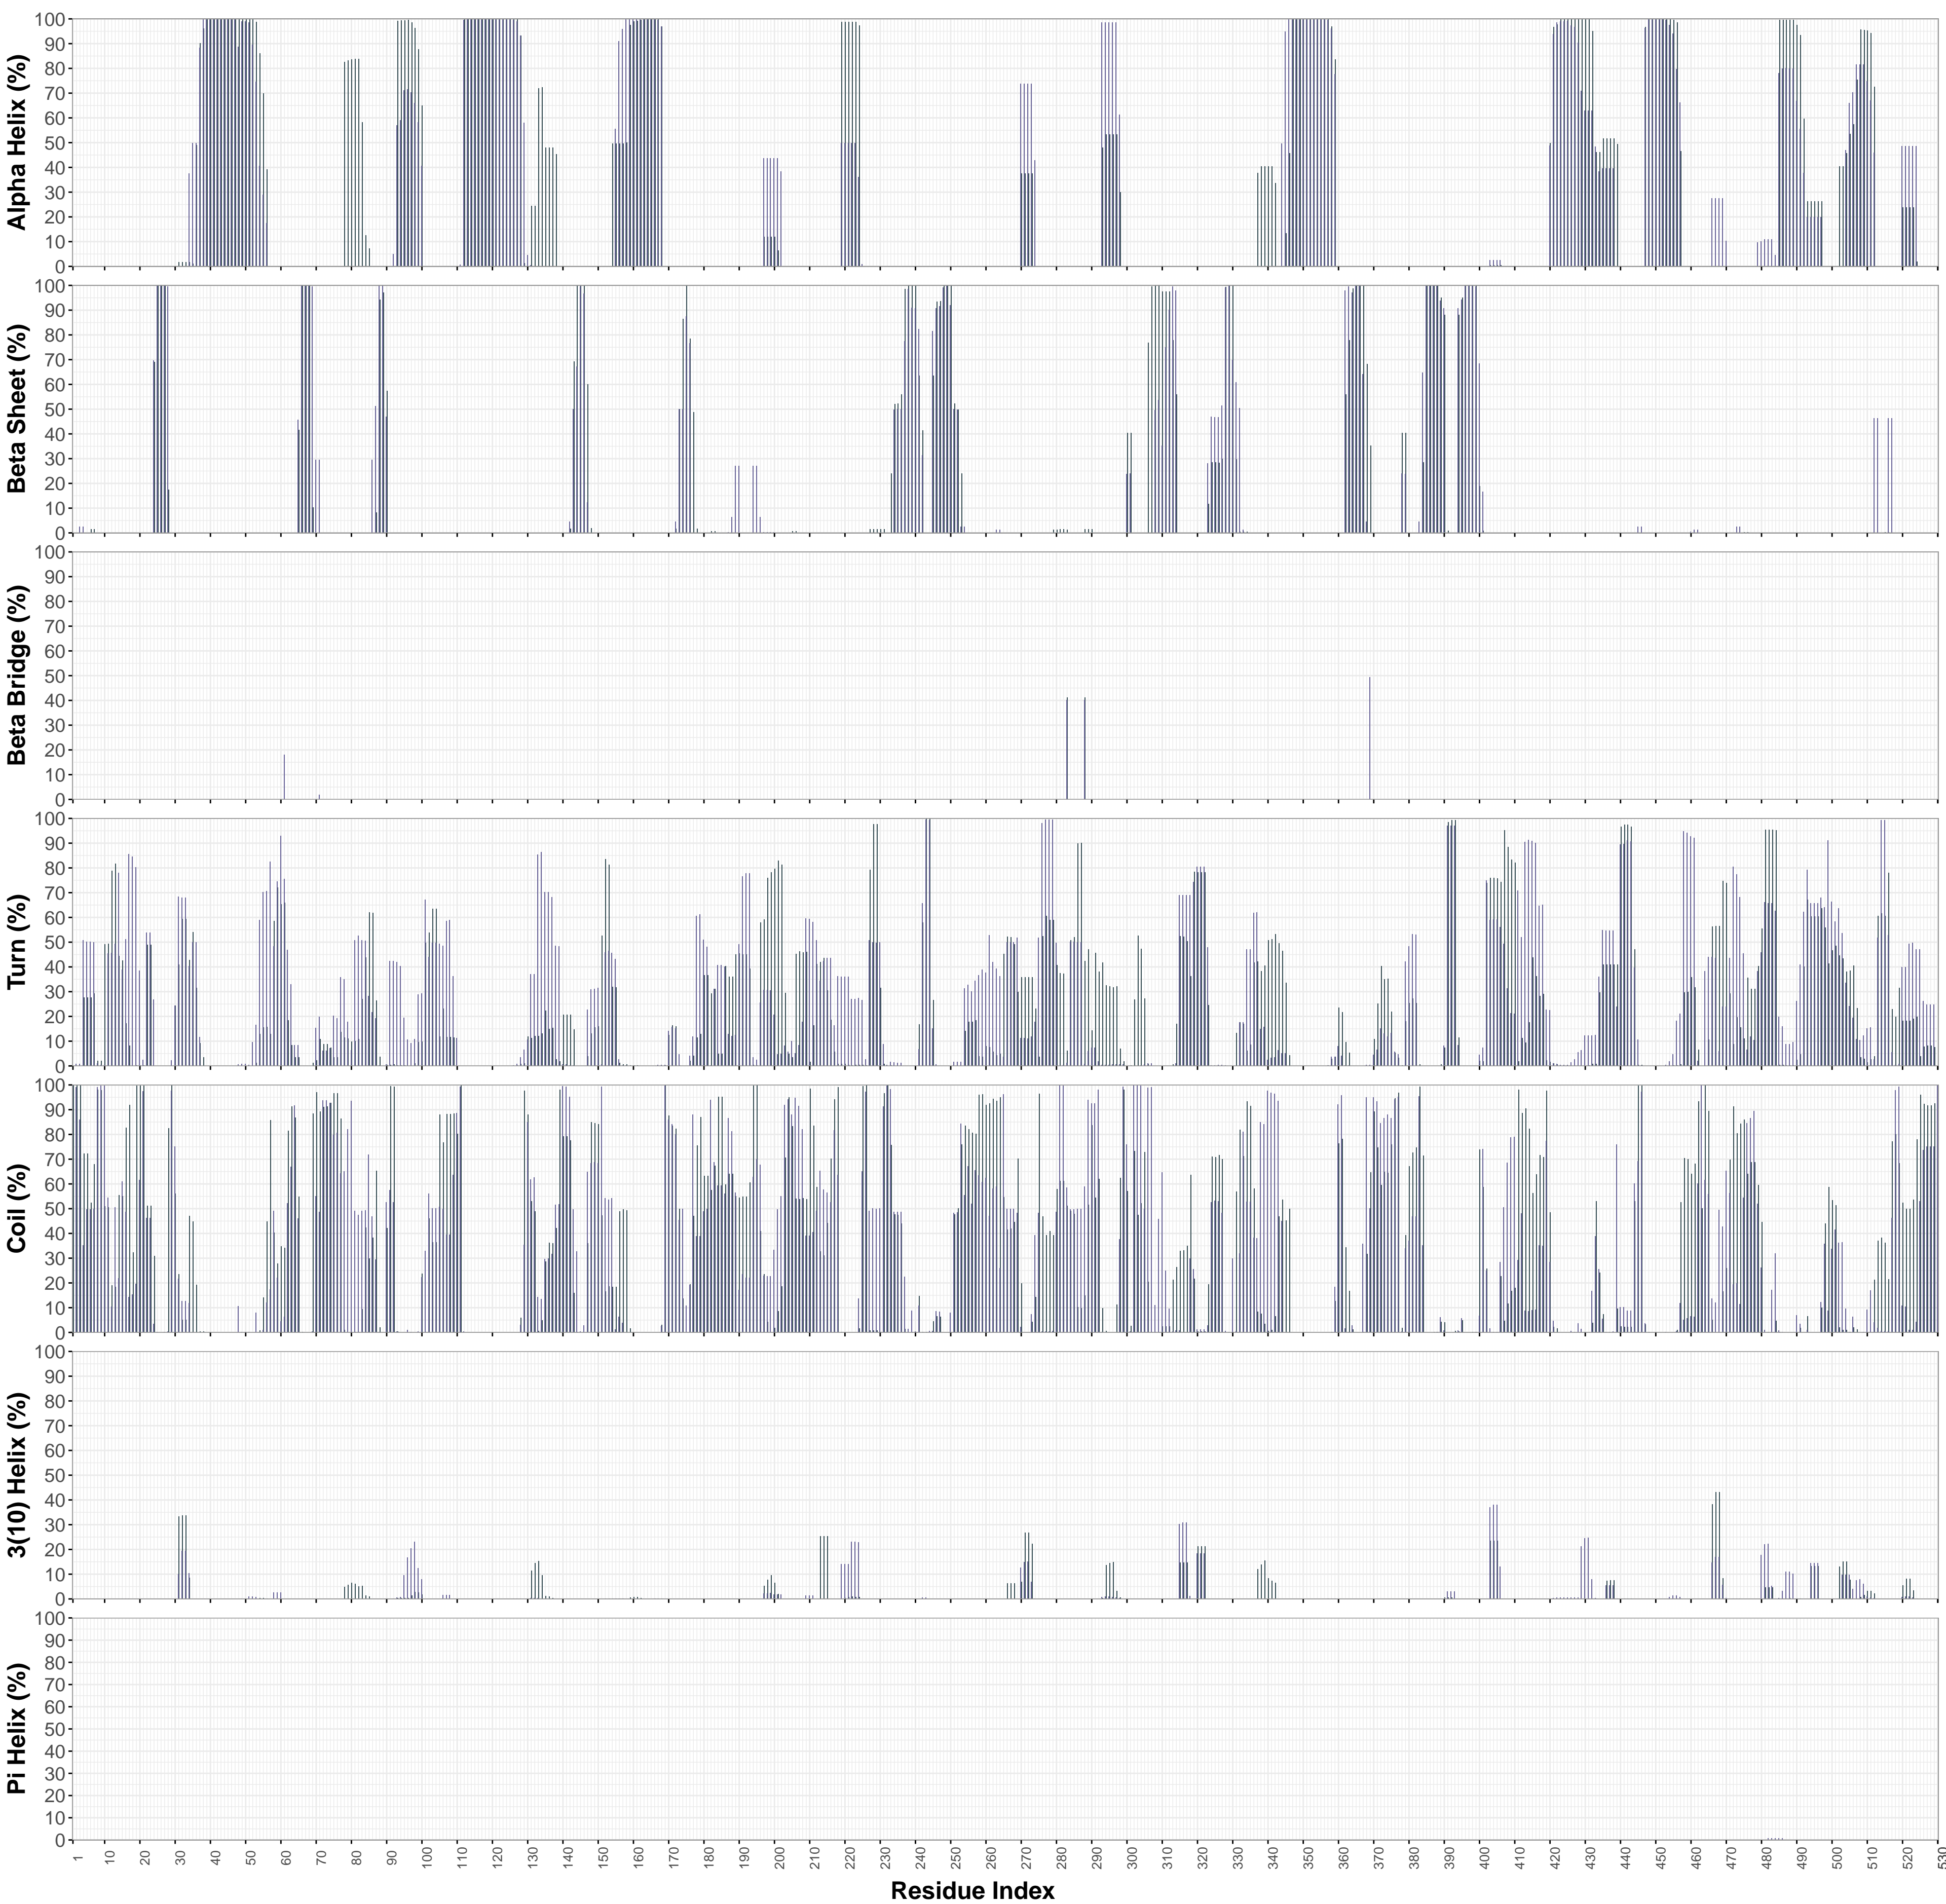

Supplement: Figure_S9_allResiduesSecondaryStructures_last75ns.pdf [file Figure_S9_allResiduesSecondaryStructures_last75ns.pdf]
